# Supplementary material for: Transcriptome analysis revealed that AcWRKY75 transcription factor reduced the resistance of kiwifruit to Pseudomonas syringae pv. actinidiae
Source: Front Plant Sci. 2024 Oct 24;15:1488572. doi: 10.3389/fpls.2024.1488572 (PMC11540699; doi:10.3389/fpls.2024.1488572)
Supplement: Supplementary file 5 [file Table1.xlsx]

## Sheet: Table S1
Table S1 RNA sequencing data analysis.
Sample	Total reads	Clean Reads	mapped rate	Uniquely mapped rate	Q30	GC Content (%)
HR1	43334596	21667298	35530997(81.99%)	34231456(78.99%)	0.9655	0.4616
HR2	40532646	20266323	32991746(81.40%)	31769767(78.38%)	0.9622	0.4591
HR3	40662554	20331277	33240729(81.75%)	32004790(78.71%)	0.9634	0.4592
HS1	58758038	29379019	43709978(74.39%)	42084274(71.62%)	0.9023	0.4629
HS2	40371400	20185700	33157537(82.13%)	31878685(78.96%)	0.9641	0.4617
HS3	43611084	21805542	36198604(83.00%)	34789534(79.77%)	0.9578	0.465

## Sheet: Table S2
Table S2 The Summary of 563 differentially expressed genes of RNA sequencing.
Gene_id	HR3_Count	HR2_Count	HR1_Count	HS3_Count	HS2_Count	HS1_Count	HR3_FPKM	HR2_FPKM	HR1_FPKM	HS3_FPKM	HS2_FPKM	HS1_FPKM	FDR	log2FC	regulated	COG_class	COG_class_annotation	GO_annotation	KEGG_annotation	KEGG_pathway_annotation	KOG_class	KOG_class_annotation	Pfam_annotation	Swiss-Prot_annotation	eggNOG_class	eggNOG_class_annotation	NR_annotation
gene-CEY00_Acc00864	108	65	90	424	365	466	1.79335	1.09392	1.40556	6.46399	6.079	5.89027	6.65e-33	1.9063	up	[QV]	Secondary metabolites biosynthesis, transport and catabolism;; Defense mechanisms	Molecular Function: monooxygenase activity (GO:0004497);; Molecular Function: iron ion binding (GO:0005506);; Cellular Component: integral component of membrane (GO:0016021);; Molecular Function: oxidoreductase activity, acting on paired donors, with incorporation or reduction of molecular oxygen (GO:0016705);; Molecular Function: heme binding (GO:0020037);;	K20667|1.6e-245|sind:105173756|K20667 beta-amyrin 28-monooxygenase [EC:1.14.14.126] | (RefSeq) beta-amyrin 28-oxidase-like	--	[QI]	Secondary metabolites biosynthesis, transport and catabolism;; Lipid transport and metabolism	Cytochrome P450	Beta-amyrin 28-monooxygenase OS=Vitis vinifera OX=29760 GN=CYP716A15 PE=1 SV=1	Q	Secondary metabolites biosynthesis, transport and catabolism	Beta-amyrin 28-oxidase [Actinidia chinensis var. chinensis]
gene-CEY00_Acc06063	69	83	124	250	257	307	1.5949	1.93978	2.66835	5.25363	5.91895	5.34936	1.08e-11	1.24837	up	[IR]	Lipid transport and metabolism;; General function prediction only	Molecular Function: hydrolase activity, acting on ester bonds (GO:0016788);;	K00679|1.4e-50|cic:CICLE_v10027727mg|K00679 phospholipid:diacylglycerol acyltransferase [EC:2.3.1.158] | (RefSeq) hypothetical protein	Glycerolipid metabolism (ko00561)	--	--	GDSL-like Lipase/Acylhydrolase	GDSL esterase/lipase At2g23540 OS=Arabidopsis thaliana OX=3702 GN=At2g23540 PE=2 SV=1	S	Function unknown	GDSL esterase/lipase [Actinidia chinensis var. chinensis]
gene-CEY00_Acc19207	0	0	0	124	82	74	0	0	0	3.12662	2.26375	1.54551	1.21e-27	2.82105	up	[Q]	Secondary metabolites biosynthesis, transport and catabolism	Molecular Function: metal ion binding (GO:0046872);; Molecular Function: dioxygenase activity (GO:0051213);;	K23947|3.0e-112|sind:105176872|K23947 2-oxoglutarate-dependent dioxygenase [EC:1.14.11.-] | (RefSeq) 2-oxoglutarate-dependent dioxygenase DAO	Tryptophan metabolism (ko00380)	[QR]	Secondary metabolites biosynthesis, transport and catabolism;; General function prediction only	2OG-Fe(II) oxygenase superfamily	2-oxoglutarate-dependent dioxygenase DAO OS=Oryza sativa subsp. indica OX=39946 GN=DAO PE=3 SV=1	Q	Secondary metabolites biosynthesis, transport and catabolism	2-oxoglutarate-dependent dioxygenase [Actinidia chinensis var. chinensis]
gene-CEY00_Acc31453	606	635	781	270	163	259	11.4589	12.1635	13.7857	4.64457	3.06382	3.69744	4.2e-26	-1.53483	down	--	--	Biological Process: signal transduction (GO:0007165);;	--	--	--	--	Putative nuclear localisation signal	Ninja-family protein AFP2 OS=Arabidopsis thaliana OX=3702 GN=AFP2 PE=1 SV=1	S	Function unknown	Ninja-family protein [Actinidia chinensis var. chinensis]
gene-CEY00_Acc02337	18	34	30	115	80	76	0.567377	1.14118	0.913289	3.47073	2.64343	1.9068	8.02e-06	1.13791	up	--	--	Molecular Function: calcium ion binding (GO:0005509);; Cellular Component: integral component of membrane (GO:0016021);;	K02183|2.1e-29|vvi:100249271|K02183 calmodulin | (RefSeq) probable calcium-binding protein CML45	MAPK signaling pathway - plant (ko04016);; Phosphatidylinositol signaling system (ko04070);; Plant-pathogen interaction (ko04626)	[T]	Signal transduction mechanisms	EF hand	Probable calcium-binding protein CML46 OS=Arabidopsis thaliana OX=3702 GN=CML46 PE=1 SV=1	T	Signal transduction mechanisms	Calcium-binding protein CML45 [Actinidia chinensis var. chinensis]
Actinidia_chinensis_newGene_2968	22	19	12	58	45	69	0.250847	0.247112	0.118649	0.656471	0.525429	0.711635	0.000115944	1.03349	up	--	--	Molecular Function: DNA binding (GO:0003677);; Molecular Function: DNA helicase activity (GO:0003678);; Molecular Function: ATP binding (GO:0005524);; Biological Process: nucleobase-containing compound metabolic process (GO:0006139);; Biological Process: regulation of transcription, DNA-templated (GO:0006355);;	K11136|1.2e-07|cic:CICLE_v10024801mg|K11136 regulator of telomere elongation helicase 1 [EC:3.6.4.12] | (RefSeq) hypothetical protein	--	--	--	--	--	--	--	Regulator of telomere elongation helicase [Actinidia chinensis var. chinensis]
gene-CEY00_Acc04606	83	54	72	189	162	197	1.5044	0.990028	1.2108	3.1304	2.93411	2.69647	1.64e-08	1.08686	up	[C]	Energy production and conversion	Biological Process: cytokinin metabolic process (GO:0009690);; Molecular Function: cytokinin dehydrogenase activity (GO:0019139);; Molecular Function: FAD binding (GO:0071949);;	K00279|6.0e-262|tcc:18591458|K00279 cytokinin dehydrogenase [EC:1.5.99.12] | (RefSeq) cytokinin dehydrogenase 5	Zeatin biosynthesis (ko00908)	[C]	Energy production and conversion	Cytokinin dehydrogenase 1, FAD and cytokinin binding	Cytokinin dehydrogenase 5 OS=Arabidopsis thaliana OX=3702 GN=CKX5 PE=2 SV=1	C	Energy production and conversion	Cytokinin dehydrogenase [Actinidia chinensis var. chinensis]
gene-CEY00_Acc21833	858	869	997	420	419	496	40.1474	41.1868	43.5706	17.8759	19.5161	17.5298	3.37e-24	-1.09839	down	--	--	Biological Process: lipid transport (GO:0006869);;	--	--	--	--	Probable lipid transfer	Probable non-specific lipid-transfer protein AKCS9 OS=Vigna unguiculata OX=3917 PE=2 SV=1	--	--	Non-specific lipid-transfer protein [Actinidia chinensis var. chinensis]
gene-CEY00_Acc11148	19	19	13	63	48	57	0.13641	0.137642	0.089093	0.414792	0.349363	0.314342	8.26e-05	1.05431	up	--	--	Molecular Function: calmodulin binding (GO:0005516);;	--	--	--	--	Plant calmodulin-binding domain	Calmodulin binding protein PICBP OS=Arabidopsis thaliana OX=3702 GN=PICBP PE=2 SV=1	S	Function unknown	Dentin sialoprotein [Actinidia chinensis var. chinensis]
Actinidia_chinensis_newGene_100	206	218	166	38	56	68	2.46682	2.61554	1.86897	0.390774	0.657064	0.606793	5.67e-17	-1.65843	down	--	--	--	--	--	--	--	--	--	--	--	hypothetical protein PanWU01x14_113810 [Parasponia andersonii]
gene-CEY00_Acc12235	14	6	6	35	42	46	0.290953	0.128589	0.120715	0.698959	0.909024	0.754111	4.58e-05	1.14562	up	--	--	Molecular Function: DNA binding (GO:0003677);; Molecular Function: transcription factor activity, sequence-specific DNA binding (GO:0003700);; Cellular Component: nucleus (GO:0005634);;	K12900|1.3e-29|lang:109341833|K12900 FUS-interacting serine-arginine-rich protein 1 | (RefSeq) serine/arginine-rich SC35-like splicing factor SCL30A	Spliceosome (ko03040)	--	--	AP2 domain	Ethylene-responsive transcription factor ERF110 OS=Arabidopsis thaliana OX=3702 GN=ERF110 PE=2 SV=2	K	Transcription	Ethylene-responsive transcription factor [Actinidia chinensis var. chinensis]
gene-CEY00_Acc19573	80	105	88	41	11	41	1.96643	2.62608	2.01475	0.917951	0.266575	0.752824	3.68e-06	-1.18648	down	--	--	Cellular Component: nucleus (GO:0005634);; Biological Process: response to water deprivation (GO:0009414);; Biological Process: response to salt stress (GO:0009651);; Biological Process: abscisic acid-activated signaling pathway (GO:0009738);; Biological Process: regulation of seed germination (GO:0010029);; Biological Process: vegetative to reproductive phase transition of meristem (GO:0010228);;	--	--	[O]	Posttranslational modification, protein turnover, chaperones	--	EID1-like F-box protein 3 OS=Arabidopsis thaliana OX=3702 GN=EDL3 PE=2 SV=1	O	Posttranslational modification, protein turnover, chaperones	EID1-like F-box protein [Actinidia chinensis var. chinensis]
gene-CEY00_Acc03601	35	54	52	120	138	117	0.921895	1.4366	1.2704	2.85888	3.60917	2.32858	6.92e-06	1.02875	up	--	--	Molecular Function: DNA binding (GO:0003677);; Molecular Function: transcription factor activity, sequence-specific DNA binding (GO:0003700);; Cellular Component: nucleus (GO:0005634);;	K09286|2.0e-67|sind:105160656|K09286 EREBP-like factor | (RefSeq) ethylene-responsive transcription factor 5-like	--	--	--	AP2 domain	Ethylene-responsive transcription factor 5 OS=Nicotiana tabacum OX=4097 GN=ERF5 PE=2 SV=1	K	Transcription	Ethylene-responsive transcription factor 5 like [Actinidia chinensis var. chinensis]
gene-CEY00_Acc08453	8	10	5	58	50	68	0.141559	0.188162	0.082238	1.0178	0.944851	0.983148	3.08e-10	1.65758	up	--	--	Molecular Function: UDP-glycosyltransferase activity (GO:0008194);;	K13496|8.7e-186|vvi:100248767|K13496 UDP-glucosyltransferase 73C [EC:2.4.1.-] | (RefSeq) UDP-glycosyltransferase 73C2	Zeatin biosynthesis (ko00908)	[GC]	Carbohydrate transport and metabolism;; Energy production and conversion	UDP-glucoronosyl and UDP-glucosyl transferase	UDP-glycosyltransferase 73C2 OS=Arabidopsis thaliana OX=3702 GN=UGT73C2 PE=3 SV=1	--	--	UDP-glycosyltransferase [Actinidia chinensis var. chinensis]
Actinidia_chinensis_newGene_1714	38	34	44	109	96	296	4.79744	4.43725	5.22086	12.7158	12.2875	28.8684	2.91e-08	1.3711	up	--	--	Molecular Function: structural constituent of ribosome (GO:0003735);; Cellular Component: ribosome (GO:0005840);; Biological Process: translation (GO:0006412);;	K02976|3.1e-13|adu:107468725|K02976 small subunit ribosomal protein S26e | (RefSeq) 40S ribosomal protein S26-2	Ribosome (ko03010)	[J]	Translation, ribosomal structure and biogenesis	Ribosomal protein S26e	40S ribosomal protein S26 OS=Oryza sativa subsp. japonica OX=39947 GN=RPS26 PE=2 SV=2	J	Translation, ribosomal structure and biogenesis	hypothetical protein CICLE_v10002735mg [Citrus clementina]
gene-CEY00_Acc22141	41	65	32	174	161	110	0.906954	1.47242	0.666535	3.56603	3.60645	1.87397	2.26e-06	1.16507	up	--	--	Molecular Function: transcription factor activity, sequence-specific DNA binding (GO:0003700);; Cellular Component: nucleus (GO:0005634);; Molecular Function: sequence-specific DNA binding (GO:0043565);;	K18834|8.5e-17|jre:108994063|K18834 WRKY transcription factor 1 | (RefSeq) WRKY transcription factor 1	Plant-pathogen interaction (ko04626)	--	--	WRKY DNA -binding domain	Probable WRKY transcription factor 40 OS=Arabidopsis thaliana OX=3702 GN=WRKY40 PE=1 SV=1	K	Transcription	WRKY transcription factor [Actinidia chinensis var. chinensis]
Actinidia_chinensis_newGene_6412	17	11	11	50	41	66	0.575255	0.358976	0.350311	1.54578	1.38084	1.6872	1.36e-05	1.17438	up	--	--	--	K15255|9.6e-22|nsy:104233171|K15255 ATP-dependent DNA helicase PIF1 [EC:3.6.4.12] | (RefSeq) ATP-dependent DNA helicase PIF1-like	--	--	--	Ferritin-like domain	Desiccation-related protein PCC13-62 OS=Craterostigma plantagineum OX=4153 PE=2 SV=1	S	Function unknown	Desiccation-related protein like [Actinidia chinensis var. chinensis]
gene-CEY00_Acc09804	38	40	33	111	96	130	1.49493	1.5592	1.21044	3.9599	3.76656	3.84501	6.6e-08	1.18016	up	--	--	Biological Process: G-protein coupled receptor signaling pathway (GO:0007186);;	--	--	--	--	GGL domain	Guanine nucleotide-binding protein subunit gamma 3 OS=Arabidopsis thaliana OX=3702 GN=GG3 PE=2 SV=1	S	Function unknown	Guanine nucleotide-binding protein subunit gamma 3 like [Actinidia chinensis var. chinensis]
gene-CEY00_Acc17293	14	5	14	83	102	107	0.630013	0.236704	0.578114	3.52824	4.74345	3.7809	3.48e-16	2.01093	up	--	--	Molecular Function: DNA binding (GO:0003677);; Molecular Function: transcription factor activity, sequence-specific DNA binding (GO:0003700);; Cellular Component: nucleus (GO:0005634);;	K13433|4.1e-43|qsu:112020158|K13433 pathogenesis-related genes transcriptional activator PTI5 | (RefSeq) pathogenesis-related genes transcriptional activator PTI5-like	Plant-pathogen interaction (ko04626)	--	--	AP2 domain	Pathogenesis-related genes transcriptional activator PTI5 OS=Solanum lycopersicum OX=4081 GN=PTI5 PE=2 SV=1	K	Transcription	Pathogenesis-related transcriptional activator like [Actinidia chinensis var. chinensis]
gene-CEY00_Acc22439	25	32	22	120	83	148	0.653427	0.854894	0.537111	2.8623	2.18285	2.9351	2.35e-11	1.52688	up	--	--	Molecular Function: transcription factor activity, sequence-specific DNA binding (GO:0003700);; Cellular Component: nucleus (GO:0005634);; Molecular Function: sequence-specific DNA binding (GO:0043565);;	K13424|4.4e-20|csat:104768914|K13424 WRKY transcription factor 33 | (RefSeq) probable WRKY transcription factor 26 isoform X1	MAPK signaling pathway - plant (ko04016);; Plant-pathogen interaction (ko04626)	--	--	WRKY DNA -binding domain	Probable WRKY transcription factor 40 OS=Arabidopsis thaliana OX=3702 GN=WRKY40 PE=1 SV=1	K	Transcription	WRKY transcription factor 40 [Actinidia chinensis var. chinensis]
gene-CEY00_Acc07612	117	89	102	296	181	279	1.55909	1.19814	1.26173	3.59705	2.41112	2.81465	4.48e-08	1.01352	up	[T]	Signal transduction mechanisms	Cellular Component: integral component of membrane (GO:0016021);; Molecular Function: oxidoreductase activity (GO:0016491);;	K00521|6.9e-301|nta:107807141|K00521 ferric-chelate reductase [EC:1.16.1.7] | (RefSeq) ferric reduction oxidase 2-like	--	[PQ]	Inorganic ion transport and metabolism;; Secondary metabolites biosynthesis, transport and catabolism	Ferric reductase NAD binding domain	Ferric reduction oxidase 2 OS=Arabidopsis thaliana OX=3702 GN=FRO2 PE=1 SV=2	--	--	Ferric reduction oxidase [Actinidia chinensis var. chinensis]
Actinidia_chinensis_newGene_2633	52	61	69	26	15	8	1.72104	2.02149	2.12426	0.782918	0.477816	0.198419	7.07e-06	-1.21817	down	--	--	Cellular Component: integral component of membrane (GO:0016021);;	--	--	--	--	--	--	--	--	Kinetochore protein NDC80 [Actinidia chinensis var. chinensis]
gene-CEY00_Acc33226	593	618	589	1657	1291	1858	7.79898	8.22321	7.22053	19.8187	16.9095	18.4383	1.68e-34	1.23555	up	--	--	Biological Process: cell morphogenesis (GO:0000902);; Biological Process: cell morphogenesis involved in differentiation (GO:0000904);; Molecular Function: molecular_function (GO:0003674);; Molecular Function: structural molecule activity (GO:0005198);; Molecular Function: structural constituent of cell wall (GO:0005199);; Molecular Function: protein binding (GO:0005515);; Cellular Component: cel…	--	--	--	--	Leucine rich repeat	Leucine-rich repeat extensin-like protein 2 OS=Arabidopsis thaliana OX=3702 GN=LRX2 PE=1 SV=1	S	Function unknown	Leucine-rich repeat extensin-like protein [Actinidia chinensis var. chinensis]
Actinidia_chinensis_newGene_2772	486	447	583	192	236	323	14.3182	13.3288	16.0356	5.13337	6.91509	7.17888	2.05e-12	-1.04813	down	--	--	--	--	--	--	--	--	--	--	--	Rop guanine nucleotide exchange factor like [Actinidia chinensis var. chinensis]
gene-CEY00_Acc21852	102	86	98	335	236	300	2.02471	1.72389	1.81269	6.07314	4.67273	4.5056	1.39e-14	1.31464	up	[QV]	Secondary metabolites biosynthesis, transport and catabolism;; Defense mechanisms	Molecular Function: monooxygenase activity (GO:0004497);; Molecular Function: iron ion binding (GO:0005506);; Molecular Function: oxidoreductase activity, acting on paired donors, with incorporation or reduction of molecular oxygen (GO:0016705);; Molecular Function: heme binding (GO:0020037);;	K20562|1.1e-128|thj:104815260|K20562 biphenyl-4-hydroxylase | (RefSeq) cytochrome P450 CYP736A12-like	--	[Q]	Secondary metabolites biosynthesis, transport and catabolism	Cytochrome P450	Cytochrome P450 CYP736A12 OS=Panax ginseng OX=4054 PE=2 SV=1	Q	Secondary metabolites biosynthesis, transport and catabolism	Cytochrome P450 CYP736A12 like [Actinidia chinensis var. chinensis]
gene-CEY00_Acc12414	7	2	14	89	67	80	0.212234	0.060742	0.391051	2.44098	2.0054	1.8188	1.49e-13	1.91716	up	--	--	Molecular Function: transcription factor activity, sequence-specific DNA binding (GO:0003700);; Cellular Component: nucleus (GO:0005634);; Molecular Function: sequence-specific DNA binding (GO:0043565);;	K18834|1.5e-16|mtr:MTR_5g097490|K18834 WRKY transcription factor 1 | (RefSeq) WRKY family transcription factor	Plant-pathogen interaction (ko04626)	--	--	WRKY DNA -binding domain	WRKY transcription factor WRKY71 OS=Oryza sativa subsp. indica OX=39946 GN=WRKY71 PE=1 SV=1	K	Transcription	WRKY transcription factor [Actinidia chinensis var. chinensis]
gene-CEY00_Acc02911	13	32	26	96	79	134	0.69443	1.72599	1.28189	4.67539	4.20076	5.42142	4.61e-09	1.4253	up	--	--	Biological Process: fatty acid biosynthetic process (GO:0006633);; Cellular Component: membrane (GO:0016020);; Molecular Function: transferase activity, transferring acyl groups other than amino-acyl groups (GO:0016747);;	K15397|1.6e-79|hbr:110658063|K15397 3-ketoacyl-CoA synthase [EC:2.3.1.199] | (RefSeq) 3-ketoacyl-CoA synthase 19-like	Fatty acid elongation (ko00062);; Plant-pathogen interaction (ko04626)	--	--	FAE1/Type III polyketide synthase-like protein	3-ketoacyl-CoA synthase 19 OS=Arabidopsis thaliana OX=3702 GN=KCS19 PE=2 SV=1	I	Lipid transport and metabolism	3-ketoacyl-CoA synthase, partial [Actinidia chinensis var. chinensis]
gene-CEY00_Acc21376	9	19	17	62	41	67	0.426592	0.928206	0.768092	2.77873	2.03503	2.52597	2.78e-05	1.13171	up	--	--	--	--	--	--	--	--	--	--	--	Transcription factor bHLH13 like [Actinidia chinensis var. chinensis]
gene-CEY00_Acc26782	377	350	404	174	178	233	7.92791	7.45002	7.94597	3.32829	3.72842	3.69635	2.28e-13	-1.00262	down	[QV]	Secondary metabolites biosynthesis, transport and catabolism;; Defense mechanisms	Molecular Function: monooxygenase activity (GO:0004497);; Molecular Function: iron ion binding (GO:0005506);; Molecular Function: oxidoreductase activity, acting on paired donors, with incorporation or reduction of molecular oxygen (GO:0016705);; Molecular Function: heme binding (GO:0020037);;	K20617|8.1e-160|egr:104423680|K20617 cytochrome P450 family 71 subfamily A | (RefSeq) cytochrome P450 71A26	--	[Q]	Secondary metabolites biosynthesis, transport and catabolism	Cytochrome P450	Cytochrome P450 736A117 OS=Prunus mume OX=102107 GN=CYP736A117 PE=2 SV=1	Q	Secondary metabolites biosynthesis, transport and catabolism	cytochrome P450, family 71, subfamily A protein [Actinidia chinensis var. chinensis]
gene-CEY00_Acc26007	451	457	519	218	217	255	12.0461	12.3558	12.9234	5.2973	5.77696	5.13218	1.12e-17	-1.09661	down	[G]	Carbohydrate transport and metabolism	Molecular Function: fructose-bisphosphate aldolase activity (GO:0004332);; Biological Process: glycolytic process (GO:0006096);;	K01623|1.9e-179|oeu:111378620|K01623 fructose-bisphosphate aldolase, class I [EC:4.1.2.13] | (RefSeq) fructose-bisphosphate aldolase, cytoplasmic isozyme 1	Glycolysis / Gluconeogenesis (ko00010);; Pentose phosphate pathway (ko00030);; Fructose and mannose metabolism (ko00051);; Carbon fixation in photosynthetic organisms (ko00710);; Carbon metabolism (ko01200);; Biosynthesis of amino acids (ko01230)	[G]	Carbohydrate transport and metabolism	Fructose-bisphosphate aldolase class-I	Fructose-bisphosphate aldolase 5, cytosolic OS=Arabidopsis thaliana OX=3702 GN=FBA5 PE=1 SV=1	G	Carbohydrate transport and metabolism	Fructose-bisphosphate aldolase [Actinidia chinensis var. chinensis]
gene-CEY00_Acc07955	12	18	14	116	60	78	0.544483	0.861502	0.598723	5.13973	2.8938	2.88095	9.16e-10	1.56996	up	--	--	--	--	--	--	--	--	--	--	--	hypothetical protein CEY00_Acc07955 [Actinidia chinensis var. chinensis]
gene-CEY00_Acc16500	45	58	69	153	172	194	0.771746	0.99955	1.10192	2.39779	2.95723	2.51658	4.36e-10	1.23881	up	[QV]	Secondary metabolites biosynthesis, transport and catabolism;; Defense mechanisms	Molecular Function: monooxygenase activity (GO:0004497);; Molecular Function: iron ion binding (GO:0005506);; Molecular Function: oxidoreductase activity, acting on paired donors, with incorporation or reduction of molecular oxygen (GO:0016705);; Molecular Function: heme binding (GO:0020037);;	K15401|9.4e-260|sind:105165168|K15401 long-chain fatty acid omega-monooxygenase [EC:1.14.14.80] | (RefSeq) cytochrome P450 86A1	Fatty acid degradation (ko00071);; Cutin, suberine and wax biosynthesis (ko00073)	[QI]	Secondary metabolites biosynthesis, transport and catabolism;; Lipid transport and metabolism	Cytochrome P450	Cytochrome P450 86A1 OS=Arabidopsis thaliana OX=3702 GN=CYP86A1 PE=1 SV=2	Q	Secondary metabolites biosynthesis, transport and catabolism	Cytochrome P450 86A1 like [Actinidia chinensis var. chinensis]
gene-CEY00_Acc10529	105	91	115	251	245	345	1.69633	1.48389	1.72583	3.68754	3.94918	4.21558	3.1e-13	1.17413	up	[G]	Carbohydrate transport and metabolism	Molecular Function: 6-phosphofructokinase activity (GO:0003872);; Molecular Function: ATP binding (GO:0005524);; Cellular Component: cytoplasm (GO:0005737);; Biological Process: fructose 6-phosphate metabolic process (GO:0006002);; Molecular Function: metal ion binding (GO:0046872);;	K00850|8.7e-269|hbr:110644063|K00850 6-phosphofructokinase 1 [EC:2.7.1.11] | (RefSeq) ATP-dependent 6-phosphofructokinase 5, chloroplastic-like isoform X1	Glycolysis / Gluconeogenesis (ko00010);; Pentose phosphate pathway (ko00030);; Fructose and mannose metabolism (ko00051);; Galactose metabolism (ko00052);; Carbon metabolism (ko01200);; Biosynthesis of amino acids (ko01230);; RNA degradation (ko03018)	[G]	Carbohydrate transport and metabolism	Phosphofructokinase	ATP-dependent 6-phosphofructokinase 5, chloroplastic OS=Arabidopsis thaliana OX=3702 GN=PFK5 PE=1 SV=1	G	Carbohydrate transport and metabolism	ATP-dependent 6-phosphofructokinase [Actinidia chinensis var. chinensis]
gene-CEY00_Acc15702	37	33	25	152	112	143	1.41864	1.24709	0.879276	5.31282	4.26508	4.12934	7.79e-13	1.55807	up	--	--	--	K12173|4.5e-20|gmx:100794341|K12173 BRCA1-A complex subunit BRE | (RefSeq) BRISC and BRCA1-A complex member 2	Homologous recombination (ko03440)	--	--	Thaumatin family	Thaumatin-like protein OS=Olea europaea OX=4146 PE=1 SV=1	S	Function unknown	Thaumatin-like protein [Actinidia chinensis var. chinensis]
gene-CEY00_Acc25182	9	7	5	120	74	136	0.113708	0.090923	0.054328	1.41895	0.956801	1.33396	2.91e-23	2.4333	up	[O]	Posttranslational modification, protein turnover, chaperones	Molecular Function: serine-type endopeptidase activity (GO:0004252);;	K15333|3.4e-83|nsy:104224633|K15333 tRNA guanosine-2'-O-methyltransferase [EC:2.1.1.34] | (RefSeq) uncharacterized protein LOC104224633	--	--	--	Subtilase family	Subtilisin-like protease SBT5.6 OS=Arabidopsis thaliana OX=3702 GN=SBT5.6 PE=2 SV=1	G	Carbohydrate transport and metabolism	Subtilisin-like protease [Actinidia chinensis var. chinensis]
gene-CEY00_Acc30864	448	563	506	251	188	274	3.88053	4.94352	4.09599	1.97691	1.61993	1.78984	5.59e-16	-1.13003	down	--	--	Cellular Component: trans-Golgi network (GO:0005802);; Biological Process: intracellular cholesterol transport (GO:0032367);;	--	--	[T]	Signal transduction mechanisms	--	--	T	Signal transduction mechanisms	LisH domain and HEAT repeat-containing protein [Actinidia chinensis var. chinensis]
gene-CEY00_Acc27172	18	9	6	55	41	47	0.520287	0.253163	0.15675	1.46732	1.20443	1.04062	4.83e-05	1.13442	up	--	--	Molecular Function: protein phosphatase inhibitor activity (GO:0004864);; Biological Process: defense response (GO:0006952);; Biological Process: abscisic acid-activated signaling pathway (GO:0009738);; Molecular Function: abscisic acid binding (GO:0010427);; Molecular Function: signaling receptor activity (GO:0038023);;	--	--	--	--	Pathogenesis-related protein Bet v 1 family	Major allergen Pru ar 1 OS=Prunus armeniaca OX=36596 PE=1 SV=1	S	Function unknown	Major allergen Pru ar like [Actinidia chinensis var. chinensis]
gene-CEY00_Acc07953	14	19	11	123	52	62	0.599436	0.828125	0.421845	4.92964	2.25833	2.04327	2.42e-07	1.38857	up	--	--	--	--	--	--	--	--	--	--	--	Acyl-coenzyme A synthetase [Actinidia chinensis var. chinensis]
gene-CEY00_Acc27164	3	8	7	33	39	55	0.08824	0.350317	0.266503	1.28171	1.69144	1.79548	6.28e-07	1.37575	up	--	--	Molecular Function: protein phosphatase inhibitor activity (GO:0004864);; Biological Process: defense response (GO:0006952);; Biological Process: abscisic acid-activated signaling pathway (GO:0009738);; Molecular Function: abscisic acid binding (GO:0010427);; Molecular Function: signaling receptor activity (GO:0038023);;	K05387|2.2e-10|peq:110030824|K05387 glutamate receptor, ionotropic, plant | (RefSeq) LOW QUALITY PROTEIN: glutamate receptor 2.3-like	--	--	--	Pathogenesis-related protein Bet v 1 family	Major allergen Pru ar 1 OS=Prunus armeniaca OX=36596 PE=1 SV=1	S	Function unknown	Major allergen Pru ar like [Actinidia chinensis var. chinensis]
gene-CEY00_Acc17445	10	16	17	77	37	51	0.18818	0.300458	0.28998	1.33021	0.68992	0.733728	7.62e-05	1.09496	up	[E]	Amino acid transport and metabolism	Molecular Function: tryptophan synthase activity (GO:0004834);;	K01696|3.8e-191|dzi:111281337|K01696 tryptophan synthase beta chain [EC:4.2.1.20] | (RefSeq) tryptophan synthase beta chain 1-like	Glycine, serine and threonine metabolism (ko00260);; Phenylalanine, tyrosine and tryptophan biosynthesis (ko00400);; Biosynthesis of amino acids (ko01230)	[E]	Amino acid transport and metabolism	Pyridoxal-phosphate dependent enzyme	Tryptophan synthase beta chain 2, chloroplastic OS=Camptotheca acuminata OX=16922 GN=TSB PE=2 SV=1	E	Amino acid transport and metabolism	Tryptophan synthase beta chain 2 like [Actinidia chinensis var. chinensis]
gene-CEY00_Acc01138	29	20	17	126	80	84	0.458819	0.321861	0.255063	1.85631	1.29483	1.0294	1.47e-08	1.41325	up	[IQ]	Lipid transport and metabolism;; Secondary metabolites biosynthesis, transport and catabolism	Molecular Function: ligase activity (GO:0016874);;	K23618|1.3e-276|hbr:110666895|K23618 acyl-activating enzyme 11/12 [EC:6.2.1.2 6.2.1.-] | (RefSeq) butyrate--CoA ligase AAE11, peroxisomal-like	--	[I]	Lipid transport and metabolism	AMP-binding enzyme	Butyrate--CoA ligase AAE11, peroxisomal OS=Arabidopsis thaliana OX=3702 GN=AAE11 PE=1 SV=1	I	Lipid transport and metabolism	Butyrate--CoA ligase AAE11, peroxisomal like [Actinidia chinensis var. chinensis]
gene-CEY00_Acc32727	39	37	44	219	223	272	1.03082	0.999326	1.1055	5.34756	5.97228	5.52099	1.2e-30	2.09277	up	[R]	General function prediction only	Molecular Function: chitinase activity (GO:0004568);; Biological Process: carbohydrate metabolic process (GO:0005975);; Biological Process: chitin catabolic process (GO:0006032);; Molecular Function: chitin binding (GO:0008061);; Biological Process: cell wall macromolecule catabolic process (GO:0016998);;	K01183|5.6e-110|nnu:104605246|K01183 chitinase [EC:3.2.1.14] | (RefSeq) endochitinase PR4-like	Amino sugar and nucleotide sugar metabolism (ko00520)	[R]	General function prediction only	Chitinase class I	Endochitinase EP3 OS=Arabidopsis thaliana OX=3702 GN=EP3 PE=1 SV=1	L	Replication, recombination and repair	Endochitinase [Actinidia chinensis var. chinensis]
gene-CEY00_Acc03863	84	111	119	267	242	282	1.49352	2.00298	1.98557	4.35251	4.33248	3.82005	2.54e-10	1.07894	up	--	--	Cellular Component: integral component of membrane (GO:0016021);;	K15015|4.8e-18|nnu:104598123|K15015 solute carrier family 32 (vesicular inhibitory amino acid transporter) | (RefSeq) vacuolar amino acid transporter 1-like	--	[E]	Amino acid transport and metabolism	Transmembrane amino acid transporter protein	Lysine histidine transporter 1 OS=Arabidopsis thaliana OX=3702 GN=LHT1 PE=1 SV=1	E	Amino acid transport and metabolism	Lysine histidine transporter like [Actinidia chinensis var. chinensis]
gene-CEY00_Acc29641	77	82	114	267	234	383	1.50543	1.62046	2.07504	4.7527	4.5699	5.65586	3.12e-15	1.36949	up	--	--	Molecular Function: transferase activity, transferring acyl groups other than amino-acyl groups (GO:0016747);;	K15400|1.4e-216|vvi:100854389|K15400 omega-hydroxypalmitate O-feruloyl transferase [EC:2.3.1.188] | (RefSeq) omega-hydroxypalmitate O-feruloyl transferase	Cutin, suberine and wax biosynthesis (ko00073)	--	--	Transferase family	Omega-hydroxypalmitate O-feruloyl transferase OS=Arabidopsis thaliana OX=3702 GN=HHT1 PE=1 SV=1	S	Function unknown	Omega-hydroxypalmitate O-feruloyl transferase [Actinidia chinensis var. chinensis]
gene-CEY00_Acc02995	72	85	77	221	179	224	1.49019	1.76698	1.49048	4.16903	3.69267	3.50286	2.78e-10	1.1305	up	--	--	Cellular Component: integral component of membrane (GO:0016021);;	K23877|2.3e-38|ats:109753301|K23877 xyloglucan O-acetyltransferase | (RefSeq) LOC109753301; protein ALTERED XYLOGLUCAN 4-like	--	--	--	GDSL/SGNH-like Acyl-Esterase family found in Pmr5 and Cas1p	Protein trichome birefringence-like 3 OS=Arabidopsis thaliana OX=3702 GN=TBL3 PE=2 SV=1	S	Function unknown	Protein trichome birefringence-like [Actinidia chinensis var. chinensis]
gene-CEY00_Acc13521	62	60	35	12	16	19	1.13853	1.11077	0.597461	0.197154	0.284674	0.261498	1.73e-05	-1.1658	down	--	--	Biological Process: reproduction (GO:0000003);; Cellular Component: chromatin (GO:0000785);; Molecular Function: regulatory region nucleic acid binding (GO:0001067);; Biological Process: regionalization (GO:0003002);; Biological Process: developmental process involved in reproduction (GO:0003006);; Molecular Function: molecular_function (GO:0003674);; Molecular Function: nucleic acid binding (GO:…	--	--	--	--	--	--	J	Translation, ribosomal structure and biogenesis	Low affinity vacuolar monovalent cation/H(+) antiporter like [Actinidia chinensis var. chinensis]
gene-CEY00_Acc23548	1591	1494	1604	830	747	901	23.9264	22.7472	22.5266	11.3604	11.1867	10.227	5.62e-28	-1.00777	down	--	--	Biological Process: lipid transport (GO:0006869);; Molecular Function: lipid binding (GO:0008289);; Cellular Component: integral component of membrane (GO:0016021);;	K03511|8.4e-23|apro:F751_1873|K03511 DNA polymerase kappa [EC:2.7.7.7] | (RefSeq) DNA polymerase kappa	--	[R]	General function prediction only	C2 domain	Synaptotagmin-2 OS=Arabidopsis thaliana OX=3702 GN=SYT2 PE=2 SV=1	M	Cell wall/membrane/envelope biogenesis	Synaptotagmin-2 like [Actinidia chinensis var. chinensis]
gene-CEY00_Acc07954	10	13	16	122	67	48	0.454559	0.605347	0.695949	5.37344	3.23637	1.76012	6.08e-08	1.45981	up	--	--	--	--	--	--	--	--	--	--	--	Verprolin like [Actinidia chinensis var. chinensis]
Actinidia_chinensis_newGene_7899	45	44	53	8	7	11	2.01707	2.01337	2.23995	0.307893	0.309674	0.348112	1.17e-08	-1.52102	down	--	--	--	--	--	--	--	--	--	--	--	Threonine synthase-like [Actinidia chinensis var. chinensis]
gene-CEY00_Acc14121	29	37	36	228	131	179	0.658764	0.868929	0.772062	4.85753	3.06443	3.17546	7.01e-17	1.79497	up	--	--	Molecular Function: DNA binding (GO:0003677);; Cellular Component: nucleus (GO:0005634);;	K09422|7.5e-93|tcc:18610359|K09422 transcription factor MYB, plant | (RefSeq) protein ODORANT1	--	[K]	Transcription	Myb-like DNA-binding domain	Transcription factor MYB106 OS=Arabidopsis thaliana OX=3702 GN=MYB106 PE=2 SV=1	--	--	Transcription factor like [Actinidia chinensis var. chinensis]
Actinidia_chinensis_newGene_5839	4	0	0	140	121	130	0.074131	0	0	3.17732	2.9144	2.41403	2.64e-39	3.2297	up	--	--	Molecular Function: protein dimerization activity (GO:0046983);;	--	--	--	--	--	--	--	--	Transcription factor bHLH18 like [Actinidia chinensis var. chinensis]
gene-CEY00_Acc25762	60	46	41	21	11	13	0.973116	0.757508	0.613299	0.299727	0.1745	0.148701	3.53e-05	-1.12946	down	--	--	Molecular Function: protein binding (GO:0005515);; Cellular Component: cellular_component (GO:0005575);; Cellular Component: intracellular (GO:0005622);; Cellular Component: cell (GO:0005623);; Cellular Component: nucleus (GO:0005634);; Cellular Component: cytoplasm (GO:0005737);; Biological Process: biological_process (GO:0008150);; Biological Process: response to radiation (GO:0009314);; Biolog…	--	--	--	--	NPH3 family	Root phototropism protein 2 OS=Arabidopsis thaliana OX=3702 GN=RPT2 PE=1 SV=2	S	Function unknown	Root phototropism protein [Actinidia chinensis var. chinensis]
gene-CEY00_Acc29440	284	324	408	126	145	207	7.78638	8.97582	10.4374	3.13049	3.95251	4.28447	7.1e-11	-1.0896	down	--	--	--	--	--	--	--	--	--	--	--	Glycine-rich cell wall structural protein like [Actinidia chinensis var. chinensis]
gene-CEY00_Acc27431	106	76	88	268	187	285	3.19891	2.33096	2.49092	7.38915	5.64013	6.52732	9.57e-11	1.15824	up	--	--	Biological Process: reproduction (GO:0000003);; Biological Process: regionalization (GO:0003002);; Biological Process: developmental process involved in reproduction (GO:0003006);; Cellular Component: cellular_component (GO:0005575);; Cellular Component: intracellular (GO:0005622);; Cellular Component: cell (GO:0005623);; Cellular Component: nucleus (GO:0005634);; Cellular Component: nucleoplasm …	K13944|7.6e-30|gra:105792299|K13944 LOB domain-containing protein 16 | (RefSeq) LOB domain-containing protein 16	--	--	--	Lateral organ boundaries (LOB) domain	Protein ASYMMETRIC LEAVES 2 OS=Arabidopsis thaliana OX=3702 GN=AS2 PE=1 SV=1	S	Function unknown	LOB domain-containing protein [Actinidia chinensis var. chinensis]
gene-CEY00_Acc11606	0	2	4	37	35	57	0	0.036106	0.08741	0.780867	0.798916	0.991467	1.03e-10	1.75287	up	--	--	Molecular Function: DNA binding (GO:0003677);; Molecular Function: transcription factor activity, sequence-specific DNA binding (GO:0003700);; Cellular Component: nucleus (GO:0005634);;	K12900|8.8e-31|lang:109341833|K12900 FUS-interacting serine-arginine-rich protein 1 | (RefSeq) serine/arginine-rich SC35-like splicing factor SCL30A	Spliceosome (ko03040)	--	--	AP2 domain	Ethylene-responsive transcription factor ERF110 OS=Arabidopsis thaliana OX=3702 GN=ERF110 PE=2 SV=2	K	Transcription	Ethylene-responsive transcription factor [Actinidia chinensis var. chinensis]
gene-CEY00_Acc00550	20	17	10	43	59	91	0.301464	0.256822	0.133103	0.601083	0.898406	1.05491	8.71e-06	1.19528	up	[IQ]	Lipid transport and metabolism;; Secondary metabolites biosynthesis, transport and catabolism	Molecular Function: molecular_function (GO:0003674);; Molecular Function: catalytic activity (GO:0003824);; Biological Process: biological_process (GO:0008150);; Biological Process: response to radiation (GO:0009314);; Biological Process: response to light stimulus (GO:0009416);; Biological Process: response to abiotic stimulus (GO:0009628);; Biological Process: response to endogenous stimulus (G…	K14487|1.9e-282|rcu:8285613|K14487 auxin responsive GH3 gene family | (RefSeq) probable indole-3-acetic acid-amido synthetase GH3.1	Plant hormone signal transduction (ko04075)	--	--	GH3 auxin-responsive promoter	Probable indole-3-acetic acid-amido synthetase GH3.1 OS=Arabidopsis thaliana OX=3702 GN=GH3.1 PE=2 SV=1	S	Function unknown	Indole-3-acetic acid-amido synthetase [Actinidia chinensis var. chinensis]
gene-CEY00_Acc16343	33	34	45	253	203	242	0.805389	0.8433	1.02656	5.67763	4.98416	4.49965	5.54e-29	2.11654	up	[K]	Transcription	Molecular Function: O-methyltransferase activity (GO:0008171);; Biological Process: methylation (GO:0032259);; Molecular Function: protein dimerization activity (GO:0046983);;	K22588|4.1e-105|eus:EUTSA_v10025519mg|K22588 acetylserotonin O-methyltransferase, plant [EC:2.1.1.4] | (RefSeq) hypothetical protein	Tryptophan metabolism (ko00380)	[R]	General function prediction only	O-methyltransferase domain	Acetylserotonin O-methyltransferase OS=Arabidopsis thaliana OX=3702 GN=ASMT PE=1 SV=1	S	Function unknown	(R,S)-reticuline 7-O-methyltransferase [Actinidia chinensis var. chinensis]
gene-CEY00_Acc05716	370	385	443	1323	946	1079	6.18582	6.52733	6.92282	20.1624	15.7909	13.6389	2.55e-20	1.27039	up	[MDT]	Cell wall/membrane/envelope biogenesis;; Cell cycle control, cell division, chromosome partitioning;; Signal transduction mechanisms	Molecular Function: ATP binding (GO:0005524);;	K08900|2.8e-179|vvi:100252443|K08900 mitochondrial chaperone BCS1 | (RefSeq) AAA-ATPase ASD, mitochondrial	--	[O]	Posttranslational modification, protein turnover, chaperones	Domain associated at C-terminal with AAA	AAA-ATPase ASD, mitochondrial OS=Arabidopsis thaliana OX=3702 GN=AATP1 PE=1 SV=1	O	Posttranslational modification, protein turnover, chaperones	AAA-ATPase [Actinidia chinensis var. chinensis]
gene-CEY00_Acc14463	307	220	276	708	527	650	9.31174	6.76261	7.8117	19.5463	15.9476	14.9018	2.57e-12	1.02407	up	--	--	Biological Process: cellular response to phosphate starvation (GO:0016036);;	K24195|4.2e-07|smo:SELMODRAFT_450458|K24195 xenotropic and polytropic retrovirus receptor 1 | (RefSeq) hypothetical protein	--	[P]	Inorganic ion transport and metabolism	SPX domain	SPX domain-containing protein 2 OS=Arabidopsis thaliana OX=3702 GN=SPX2 PE=2 SV=1	P	Inorganic ion transport and metabolism	SPX domain-containing protein [Actinidia chinensis var. chinensis]
gene-CEY00_Acc13518	361	388	483	167	185	192	4.4916	4.89197	5.61003	1.88459	2.28738	1.80647	5.85e-15	-1.17961	down	[T]	Signal transduction mechanisms	Molecular Function: protein serine/threonine kinase activity (GO:0004674);; Molecular Function: ATP binding (GO:0005524);; Molecular Function: carbohydrate binding (GO:0030246);; Biological Process: recognition of pollen (GO:0048544);;	K24104|2.7e-76|thj:104799061|K24104 GPN-loop GTPase | (RefSeq) LOW QUALITY PROTEIN: uncharacterized protein LOC104799061	--	--	--	Protein tyrosine and serine/threonine kinase	G-type lectin S-receptor-like serine/threonine-protein kinase At4g03230 OS=Arabidopsis thaliana OX=3702 GN=At4g03230 PE=3 SV=3	T	Signal transduction mechanisms	G-type lectin S-receptor-like serine/threonine-protein kinase [Actinidia chinensis var. chinensis]
gene-CEY00_Acc24569	4012	3731	3953	2289	1780	1853	190.595	179.435	175.318	98.9374	84.2731	66.4492	2.04e-17	-1.03004	down	--	--	Molecular Function: protein phosphatase inhibitor activity (GO:0004864);; Biological Process: defense response (GO:0006952);; Biological Process: response to biotic stimulus (GO:0009607);; Biological Process: abscisic acid-activated signaling pathway (GO:0009738);; Molecular Function: abscisic acid binding (GO:0010427);; Molecular Function: signaling receptor activity (GO:0038023);;	K05387|2.6e-11|peq:110030824|K05387 glutamate receptor, ionotropic, plant | (RefSeq) LOW QUALITY PROTEIN: glutamate receptor 2.3-like	--	--	--	Pathogenesis-related protein Bet v 1 family	Major allergen Pru ar 1 OS=Prunus armeniaca OX=36596 PE=1 SV=1	S	Function unknown	Major allergen Pru ar like [Actinidia chinensis var. chinensis]
gene-CEY00_Acc02787	467	447	511	260	199	266	12.6836	12.289	12.9475	6.41338	5.39127	5.45188	2.43e-15	-1.02952	down	--	--	Cellular Component: extracellular region (GO:0005576);; Cellular Component: cell wall (GO:0005618);; Biological Process: plant-type cell wall organization (GO:0009664);; Cellular Component: membrane (GO:0016020);;	K20628|6.6e-126|gab:108450287|K20628 expansin | (RefSeq) expansin-A8-like	--	--	--	Expansin C-terminal domain	Expansin-A8 OS=Arabidopsis thaliana OX=3702 GN=EXPA8 PE=2 SV=1	S	Function unknown	Expansin-A8 like [Actinidia chinensis var. chinensis]
gene-CEY00_Acc24383	72	76	101	236	177	200	2.01769	2.15398	2.65906	6.0834	4.98102	4.27047	1.62e-07	1.01543	up	[TK]	Signal transduction mechanisms;; Transcription	Biological Process: phosphorelay signal transduction system (GO:0000160);;	K14492|2.9e-64|zju:107406325|K14492 two-component response regulator ARR-A family | (RefSeq) two-component response regulator ORR9-like	Plant hormone signal transduction (ko04075)	[K]	Transcription	Response regulator receiver domain	Two-component response regulator ORR4 OS=Oryza sativa subsp. indica OX=39946 GN=RR4 PE=2 SV=1	K	Transcription	Two-component response regulator like [Actinidia chinensis var. chinensis]
gene-CEY00_Acc22786	13	21	38	145	79	105	0.476983	0.809859	1.35488	5.04297	3.0045	3.02925	2.95e-08	1.41076	up	--	--	Biological Process: lipid transport (GO:0006869);; Molecular Function: lipid binding (GO:0008289);; Cellular Component: integral component of membrane (GO:0016021);;	--	--	--	--	Probable lipid transfer	Non-specific lipid-transfer protein-like protein At2g13820 OS=Arabidopsis thaliana OX=3702 GN=At2g13820 PE=2 SV=1	O	Posttranslational modification, protein turnover, chaperones	Non-specific lipid-transfer protein-like protein [Actinidia chinensis var. chinensis]
gene-CEY00_Acc00969	68	97	70	27	32	22	2.52541	3.61906	2.40002	0.89966	1.15502	0.605429	3.71e-06	-1.16611	down	--	--	Cellular Component: nucleus (GO:0005634);; Biological Process: regulation of transcription, DNA-templated (GO:0006355);; Molecular Function: sequence-specific DNA binding (GO:0043565);;	K09338|9.4e-73|ccav:112513454|K09338 homeobox-leucine zipper protein | (RefSeq) homeobox-leucine zipper protein ATHB-40	--	[K]	Transcription	Homeodomain	Homeobox-leucine zipper protein ATHB-40 OS=Arabidopsis thaliana OX=3702 GN=ATHB-40 PE=2 SV=3	K	Transcription	Homeobox-leucine zipper protein like [Actinidia chinensis var. chinensis]
Actinidia_chinensis_newGene_4938	1341	1321	1495	418	583	725	63.6921	63.5021	66.2882	18.0459	27.5677	25.9983	3.03e-22	-1.29862	down	--	--	Cellular Component: photosystem II oxygen evolving complex (GO:0009654);; Biological Process: photosynthesis (GO:0015979);; Cellular Component: integral component of membrane (GO:0016021);;	K03541|9.6e-55|gmx:100305752|K03541 photosystem II 10kDa protein | (RefSeq) photosystem II subunit R-like	Photosynthesis (ko00195)	--	--	Photosystem II 10 kDa polypeptide PsbR	Photosystem II 10 kDa polypeptide, chloroplastic OS=Solanum lycopersicum OX=4081 GN=PSBR PE=2 SV=1	S	Function unknown	photosystem II subunit R-like [Glycine max]
gene-CEY00_Acc32094	150	164	174	794	486	680	4.21546	4.68551	4.57699	20.3955	13.6532	14.4843	3.35e-28	1.69986	up	--	--	--	--	--	--	--	--	--	S	Function unknown	Transcription repressor like [Actinidia chinensis var. chinensis]
gene-CEY00_Acc24572	396	305	384	2432	1997	2260	14.4691	11.2776	13.0846	80.9643	72.8039	62.433	2.51e-89	2.3679	up	--	--	Molecular Function: protein phosphatase inhibitor activity (GO:0004864);; Biological Process: defense response (GO:0006952);; Biological Process: response to biotic stimulus (GO:0009607);; Biological Process: abscisic acid-activated signaling pathway (GO:0009738);; Molecular Function: abscisic acid binding (GO:0010427);; Molecular Function: signaling receptor activity (GO:0038023);;	K05387|6.5e-10|peq:110030824|K05387 glutamate receptor, ionotropic, plant | (RefSeq) LOW QUALITY PROTEIN: glutamate receptor 2.3-like	--	--	--	Pathogenesis-related protein Bet v 1 family	Major allergen Pru ar 1 OS=Prunus armeniaca OX=36596 PE=1 SV=1	S	Function unknown	Major allergen Pru ar like [Actinidia chinensis var. chinensis]
gene-CEY00_Acc15400	115	125	117	343	526	598	2.86545	3.14332	2.72056	7.77707	13.0752	11.2686	1.89e-22	1.67976	up	--	--	Molecular Function: zinc ion transmembrane transporter activity (GO:0005385);; Cellular Component: integral component of membrane (GO:0016021);;	K14709|1.4e-145|nau:109231805|K14709 solute carrier family 39 (zinc transporter), member 1/2/3 | (RefSeq) probable zinc transporter 10	--	[P]	Inorganic ion transport and metabolism	ZIP Zinc transporter	Probable zinc transporter 10 OS=Arabidopsis thaliana OX=3702 GN=ZIP10 PE=1 SV=2	P	Inorganic ion transport and metabolism	Fe(2+) transport protein [Actinidia chinensis var. chinensis]
gene-CEY00_Acc22616	260	220	289	804	634	809	4.49046	3.8512	4.66381	12.6569	10.924	10.5697	8.02e-26	1.3369	up	[S]	Function unknown	--	K12486|3.1e-10|han:110942573|K12486 stromal membrane-associated protein | (RefSeq) probable ADP-ribosylation factor GTPase-activating protein AGD5	Endocytosis (ko04144)	--	--	--	IQ domain-containing protein IQM4 OS=Arabidopsis thaliana OX=3702 GN=IQM4 PE=2 SV=1	S	Function unknown	IQ domain-containing protein [Actinidia chinensis var. chinensis]
gene-CEY00_Acc07164	83	93	105	441	419	516	1.49469	1.70344	1.78465	7.30011	7.59726	7.08387	2.37e-43	1.9844	up	--	--	Cellular Component: integral component of membrane (GO:0016021);;	K19476|2.7e-84|cic:CICLE_v10026997mg|K19476 vacuolar protein sorting-associated protein IST1 | (RefSeq) hypothetical protein	Endocytosis (ko04144)	[E]	Amino acid transport and metabolism	Transmembrane amino acid transporter protein	Lysine histidine transporter-like 8 OS=Arabidopsis thaliana OX=3702 GN=AATL1 PE=1 SV=1	E	Amino acid transport and metabolism	Lysine histidine transporter-like [Actinidia chinensis var. chinensis]
Actinidia_chinensis_newGene_6310	63	103	56	22	30	28	0.879633	1.63	0.686268	0.332107	0.345558	0.32823	2.78e-05	-1.09278	down	--	--	Molecular Function: damaged DNA binding (GO:0003684);; Molecular Function: DNA-directed DNA polymerase activity (GO:0003887);; Cellular Component: nucleus (GO:0005634);; Biological Process: response to UV-B (GO:0010224);; Biological Process: error-prone translesion synthesis (GO:0042276);;	--	--	--	--	--	--	--	--	DNA repair protein [Actinidia chinensis var. chinensis]
gene-CEY00_Acc03929	1123	1002	1133	3654	2577	2725	28.333	25.6114	26.7037	83.9408	64.8302	51.9268	3.35e-20	1.25523	up	--	--	Molecular Function: hydrolase activity, hydrolyzing O-glycosyl compounds (GO:0004553);; Biological Process: carbohydrate metabolic process (GO:0005975);;	K19893|5.3e-57|vvi:100251609|K19893 glucan endo-1,3-beta-glucosidase 5/6 [EC:3.2.1.39] | (RefSeq) glucan endo-1,3-beta-glucosidase 6	Starch and sucrose metabolism (ko00500)	--	--	Glycosyl hydrolases family 17	Glucan endo-1,3-beta-glucosidase, basic isoform OS=Prunus persica OX=3760 GN=GNS1 PE=3 SV=1	G	Carbohydrate transport and metabolism	Glucan endo-1,3-beta-glucosidase, basic soform like [Actinidia chinensis var. chinensis]
gene-CEY00_Acc16633	656	719	618	254	300	258	27.6925	30.7189	24.3426	9.75395	12.6163	8.1954	4.88e-18	-1.28223	down	[V]	Defense mechanisms	Molecular Function: magnesium ion binding (GO:0000287);; Cellular Component: cytosol (GO:0005829);; Biological Process: dCTP catabolic process (GO:0006253);; Biological Process: DNA protection (GO:0042262);; Molecular Function: dCTP diphosphatase activity (GO:0047840);;	K16904|8.6e-53|hbr:110647948|K16904 dCTP diphosphatase [EC:3.6.1.12] | (RefSeq) dCTP pyrophosphatase 1	Pyrimidine metabolism (ko00240)	--	--	MazG nucleotide pyrophosphohydrolase domain	--	S	Function unknown	DCTP pyrophosphatase [Actinidia chinensis var. chinensis]
gene-CEY00_Acc01193	18	27	9	126	95	61	0.736154	1.15986	0.335008	4.84947	3.99762	1.94105	1.74e-07	1.39737	up	--	--	Molecular Function: kinase activity (GO:0016301);;	--	--	--	--	--	--	--	--	CAMP-dependent protein kinase catalytic subunit like [Actinidia chinensis var. chinensis]
gene-CEY00_Acc12085	27	35	34	116	117	115	0.844107	1.11494	1.00626	3.34312	3.684	2.74537	9.33e-10	1.3657	up	--	--	--	--	--	[R]	General function prediction only	C2H2-type zinc finger	Zinc finger protein ZAT10 OS=Arabidopsis thaliana OX=3702 GN=ZAT10 PE=2 SV=1	S	Function unknown	Zinc finger protein [Actinidia chinensis var. chinensis]
gene-CEY00_Acc07934	68	55	63	252	208	242	1.39422	1.13959	1.20793	4.72679	4.26966	3.77365	2.56e-18	1.56063	up	--	--	Molecular Function: transferase activity, transferring acyl groups other than amino-acyl groups (GO:0016747);;	K15400|4.6e-32|dcr:108217537|K15400 omega-hydroxypalmitate O-feruloyl transferase [EC:2.3.1.188] | (RefSeq) omega-hydroxypalmitate O-feruloyl transferase-like	Cutin, suberine and wax biosynthesis (ko00073)	--	--	Transferase family	Acyl transferase 9 OS=Oryza sativa subsp. japonica OX=39947 GN=AT9 PE=2 SV=1	S	Function unknown	Shikimate O-hydroxycinnamoyltransferase [Actinidia chinensis var. chinensis]
gene-CEY00_Acc00338	1959	1828	1992	9375	6968	9560	55.5508	52.4902	52.7417	241.978	196.928	204.71	8.21e-103	1.97062	up	[R]	General function prediction only	Molecular Function: chitinase activity (GO:0004568);; Biological Process: carbohydrate metabolic process (GO:0005975);; Biological Process: chitin catabolic process (GO:0006032);; Molecular Function: chitin binding (GO:0008061);; Biological Process: cell wall macromolecule catabolic process (GO:0016998);;	K01183|2.7e-104|dcr:108196653|K01183 chitinase [EC:3.2.1.14] | (RefSeq) endochitinase EP3	Amino sugar and nucleotide sugar metabolism (ko00520)	[R]	General function prediction only	Chitinase class I	Endochitinase EP3 OS=Arabidopsis thaliana OX=3702 GN=EP3 PE=1 SV=1	L	Replication, recombination and repair	Endochitinase [Actinidia chinensis var. chinensis]
gene-CEY00_Acc19285	113	93	110	53	35	48	1.87805	1.55853	1.70191	0.799014	0.578746	0.60054	9.62e-07	-1.07707	down	--	--	--	K14552|3.4e-40|ini:109157147|K14552 NET1-associated nuclear protein 1 (U3 small nucleolar RNA-associated protein 17) | (RefSeq) WD repeat-containing protein 75	Ribosome biogenesis in eukaryotes (ko03008)	[R]	General function prediction only	--	--	S	Function unknown	WD repeat-containing protein [Actinidia chinensis var. chinensis]
gene-CEY00_Acc13728	1165	1146	1221	450	443	569	28.6064	28.4721	27.9758	10.0433	10.8295	10.5472	1.96e-44	-1.34817	down	[Q]	Secondary metabolites biosynthesis, transport and catabolism	Molecular Function: metal ion binding (GO:0046872);; Molecular Function: dioxygenase activity (GO:0051213);;	K23947|4.0e-109|sind:105176872|K23947 2-oxoglutarate-dependent dioxygenase [EC:1.14.11.-] | (RefSeq) 2-oxoglutarate-dependent dioxygenase DAO	Tryptophan metabolism (ko00380)	[QR]	Secondary metabolites biosynthesis, transport and catabolism;; General function prediction only	2OG-Fe(II) oxygenase superfamily	2-oxoglutarate-dependent dioxygenase DAO OS=Oryza sativa subsp. indica OX=39946 GN=DAO PE=3 SV=1	Q	Secondary metabolites biosynthesis, transport and catabolism	2-oxoglutarate-dependent dioxygenase [Actinidia chinensis var. chinensis]
gene-CEY00_Acc30626	2787	2615	3138	1022	936	1344	88.5621	84.1329	93.1035	29.5529	29.6313	32.2319	1.25e-58	-1.45397	down	[P]	Inorganic ion transport and metabolism	Molecular Function: carbonate dehydratase activity (GO:0004089);; Molecular Function: zinc ion binding (GO:0008270);; Biological Process: carbon utilization (GO:0015976);;	K01673|5.8e-118|jre:108997114|K01673 carbonic anhydrase [EC:4.2.1.1] | (RefSeq) carbonic anhydrase 2-like isoform X1	Nitrogen metabolism (ko00910)	[P]	Inorganic ion transport and metabolism	Carbonic anhydrase	Carbonic anhydrase, chloroplastic OS=Nicotiana tabacum OX=4097 PE=2 SV=1	P	Inorganic ion transport and metabolism	Carbonic anhydrase [Actinidia chinensis var. chinensis]
gene-CEY00_Acc21168	9	23	17	115	95	121	0.088196	0.220815	0.149339	1.03356	0.926428	0.900925	2.51e-15	1.8777	up	[T]	Signal transduction mechanisms	Molecular Function: protein serine/threonine kinase activity (GO:0004674);; Molecular Function: ATP binding (GO:0005524);; Cellular Component: integral component of membrane (GO:0016021);;	K00924|7.1e-91|lang:109334483|K00924 kinase [EC:2.7.1.-] | (RefSeq) receptor-like protein kinase HSL1	--	--	--	Protein kinase domain	Receptor-like protein kinase 7 OS=Arabidopsis thaliana OX=3702 GN=RLK7 PE=1 SV=1	T	Signal transduction mechanisms	Receptor-like protein kinase [Actinidia chinensis var. chinensis]
gene-CEY00_Acc10053	47	43	46	111	99	144	0.801566	0.733948	0.731547	1.71235	1.67927	1.84628	1.54e-06	1.02388	up	[P]	Inorganic ion transport and metabolism	Molecular Function: N,N-dimethylaniline monooxygenase activity (GO:0004499);; Molecular Function: flavin adenine dinucleotide binding (GO:0050660);; Molecular Function: NADP binding (GO:0050661);;	K11816|1.2e-15|zju:107422611|K11816 indole-3-pyruvate monooxygenase [EC:1.14.13.168] | (RefSeq) probable indole-3-pyruvate monooxygenase YUCCA7	Tryptophan metabolism (ko00380)	[Q]	Secondary metabolites biosynthesis, transport and catabolism	Flavin-binding monooxygenase-like	Probable flavin-containing monooxygenase 1 OS=Arabidopsis thaliana OX=3702 GN=FMO1 PE=2 SV=1	Q	Secondary metabolites biosynthesis, transport and catabolism	Flavin-containing monooxygenase [Actinidia chinensis var. chinensis]
gene-CEY00_Acc09546	15	27	22	58	63	90	0.981413	1.74224	1.34562	3.48136	4.11023	4.46283	1.8e-05	1.10377	up	--	--	--	--	--	--	--	Rapid ALkalinization Factor (RALF)	Protein RALF-like 4 OS=Arabidopsis thaliana OX=3702 GN=RALFL4 PE=1 SV=1	S	Function unknown	Protein RALF-like [Actinidia chinensis var. chinensis]
gene-CEY00_Acc31239	12	24	23	80	62	51	0.357439	0.732643	0.643503	2.22361	1.87551	1.16383	0.000137531	1.03664	up	--	--	Cellular Component: integral component of membrane (GO:0016021);;	--	--	--	--	--	--	--	--	hypothetical protein CEY00_Acc31239 [Actinidia chinensis var. chinensis]
gene-CEY00_Acc17995	29	48	55	135	119	182	0.606496	1.01334	1.08083	2.58699	2.48485	2.88674	3.28e-09	1.27732	up	--	--	Molecular Function: transferase activity, transferring acyl groups other than amino-acyl groups (GO:0016747);;	K15400|6.3e-217|vvi:100854389|K15400 omega-hydroxypalmitate O-feruloyl transferase [EC:2.3.1.188] | (RefSeq) omega-hydroxypalmitate O-feruloyl transferase	Cutin, suberine and wax biosynthesis (ko00073)	--	--	Transferase family	Omega-hydroxypalmitate O-feruloyl transferase OS=Arabidopsis thaliana OX=3702 GN=HHT1 PE=1 SV=1	S	Function unknown	Omega-hydroxypalmitate O-feruloyl transferase [Actinidia chinensis var. chinensis]
gene-CEY00_Acc15788	92	88	98	242	182	246	2.58416	2.49346	2.5685	6.19583	5.09174	5.2132	4.79e-09	1.01413	up	[F]	Nucleotide transport and metabolism	Molecular Function: adenine phosphoribosyltransferase activity (GO:0003999);; Cellular Component: cytoplasm (GO:0005737);; Biological Process: adenine salvage (GO:0006168);; Biological Process: nucleoside metabolic process (GO:0009116);;	K00759|6.0e-92|vvi:100264315|K00759 adenine phosphoribosyltransferase [EC:2.4.2.7] | (RefSeq) adenine phosphoribosyltransferase 3	Purine metabolism (ko00230)	[F]	Nucleotide transport and metabolism	Phosphoribosyl transferase domain	Adenine phosphoribosyltransferase 3 OS=Arabidopsis thaliana OX=3702 GN=APT3 PE=1 SV=1	F	Nucleotide transport and metabolism	Adenine phosphoribosyltransferase [Actinidia chinensis var. chinensis]
gene-CEY00_Acc02151	7	9	16	40	46	58	0.186398	0.276571	0.436497	1.12157	1.39997	1.33117	1.25e-05	1.20135	up	--	--	Molecular Function: kinase activity (GO:0016301);;	K03283|5.4e-15|zju:107413482|K03283 heat shock 70kDa protein 1/2/6/8 | (RefSeq) heat shock cognate 70 kDa protein 2-like isoform X1	Spliceosome (ko03040);; Protein processing in endoplasmic reticulum (ko04141);; Endocytosis (ko04144)	--	--	C1 domain	--	S	Function unknown	Diacylglycerol kinase [Actinidia chinensis var. chinensis]
gene-CEY00_Acc26999	120	105	110	353	296	401	2.0431	1.8076	1.73985	5.483	5.02826	5.16337	6.45e-21	1.38934	up	--	--	Molecular Function: DNA binding (GO:0003677);; Molecular Function: transcription factor activity, sequence-specific DNA binding (GO:0003700);; Cellular Component: nucleus (GO:0005634);;	K09285|5.0e-155|tcc:18596215|K09285 AP2-like factor, ANT lineage | (RefSeq) AP2-like ethylene-responsive transcription factor AIL1	--	--	--	AP2 domain	AP2-like ethylene-responsive transcription factor AIL1 OS=Arabidopsis thaliana OX=3702 GN=AIL1 PE=2 SV=1	K	Transcription	AP2-like ethylene-responsive transcription factor [Actinidia chinensis var. chinensis]
gene-CEY00_Acc19149	1394	1278	1335	557	606	606	23.297	21.6181	20.8336	8.47387	10.0865	7.64257	1.95e-27	-1.2278	down	[QV]	Secondary metabolites biosynthesis, transport and catabolism;; Defense mechanisms	Molecular Function: monooxygenase activity (GO:0004497);; Molecular Function: iron ion binding (GO:0005506);; Cellular Component: integral component of membrane (GO:0016021);; Molecular Function: oxidoreductase activity, acting on paired donors, with incorporation or reduction of molecular oxygen (GO:0016705);; Molecular Function: heme binding (GO:0020037);;	K20617|2.7e-158|jre:108986006|K20617 cytochrome P450 family 71 subfamily A | (RefSeq) cytochrome P450 71A1-like	--	[Q]	Secondary metabolites biosynthesis, transport and catabolism	Cytochrome P450	Phenylacetaldehyde oxime monooxygenase CYP71AN24 OS=Prunus mume OX=102107 GN=CYP71AN24 PE=1 SV=1	Q	Secondary metabolites biosynthesis, transport and catabolism	Cytochrome P450 71A1 like [Actinidia chinensis var. chinensis]
gene-CEY00_Acc16306	18	21	11	119	94	121	0.686075	0.809685	0.393444	4.20096	3.6339	3.54575	5.59e-16	1.89405	up	--	--	Molecular Function: kinase activity (GO:0016301);;	K13418|9.2e-30|hbr:110642931|K13418 somatic embryogenesis receptor kinase 1 [EC:2.7.10.1 2.7.11.1] | (RefSeq) LOW QUALITY PROTEIN: somatic embryogenesis receptor kinase 2-like	--	--	--	Leucine rich repeat N-terminal domain	Leucine-rich repeat protein 1 OS=Capsicum annuum OX=4072 GN=LRR1 PE=1 SV=2	T	Signal transduction mechanisms	BRASSINOSTEROID INSENSITIVE 1-associated receptor kinase [Actinidia chinensis var. chinensis]
Actinidia_chinensis_newGene_7551	13	10	19	39	57	51	0.542879	0.424607	0.748916	1.54016	2.45742	1.66331	0.000195181	1.03512	up	--	--	Molecular Function: protein kinase activity (GO:0004672);; Molecular Function: ATP binding (GO:0005524);; Cellular Component: integral component of membrane (GO:0016021);;	--	--	--	--	Leucine Rich repeats (2 copies)	Probable LRR receptor-like serine/threonine-protein kinase At1g53430 OS=Arabidopsis thaliana OX=3702 GN=At1g53430 PE=1 SV=1	T	Signal transduction mechanisms	Leucine-rich repeat receptor-like serine/threonine-protein kinase, partial [Actinidia chinensis var. chinensis]
gene-CEY00_Acc02955	290	390	459	1193	753	1095	4.45059	6.05879	6.58226	16.6957	11.5385	12.7113	1.21e-13	1.1686	up	[DPM]	Cell cycle control, cell division, chromosome partitioning;; Inorganic ion transport and metabolism;; Cell wall/membrane/envelope biogenesis	Molecular Function: copper ion binding (GO:0005507);; Biological Process: lignin catabolic process (GO:0046274);; Cellular Component: apoplast (GO:0048046);; Molecular Function: hydroquinone:oxygen oxidoreductase activity (GO:0052716);;	K05909|4.3e-258|vvi:100251157|K05909 laccase [EC:1.10.3.2] | (RefSeq) laccase-7	--	[Q]	Secondary metabolites biosynthesis, transport and catabolism	Multicopper oxidase	Laccase-7 OS=Arabidopsis thaliana OX=3702 GN=LAC7 PE=2 SV=1	Q	Secondary metabolites biosynthesis, transport and catabolism	Laccase-7 like [Actinidia chinensis var. chinensis]
gene-CEY00_Acc02870	536	590	590	1581	1158	1580	14.9107	16.6154	15.32	40.0655	32.1323	33.2043	1.48e-24	1.14803	up	--	--	Cellular Component: mitochondrial matrix (GO:0005759);;	K15414|1.4e-94|sly:101257446|K15414 complement component 1 Q subcomponent-binding protein, mitochondrial | (RefSeq) uncharacterized protein At2g39795, mitochondrial	--	[C]	Energy production and conversion	Mitochondrial glycoprotein	Uncharacterized protein At2g39795, mitochondrial OS=Arabidopsis thaliana OX=3702 GN=At2g39795 PE=1 SV=1	C	Energy production and conversion	Mitochondrial glycoprotein [Actinidia chinensis var. chinensis]
Actinidia_chinensis_newGene_5862	132	137	130	389	248	362	3.4288	3.59748	3.16232	9.23172	6.44032	7.12347	1.28e-10	1.06988	up	--	--	Biological Process: reproduction (GO:0000003);; Biological Process: regionalization (GO:0003002);; Biological Process: developmental process involved in reproduction (GO:0003006);; Biological Process: regulation of transcription, DNA-templated (GO:0006355);; Biological Process: multicellular organism development (GO:0007275);; Biological Process: pattern specification process (GO:0007389);; Biolo…	K13944|1.5e-28|egu:105043062|K13944 LOB domain-containing protein 16 | (RefSeq) LOB domain-containing protein 16-like	--	--	--	Lateral organ boundaries (LOB) domain	LOB domain-containing protein 36 OS=Arabidopsis thaliana OX=3702 GN=LBD36 PE=2 SV=1	S	Function unknown	LOB domain-containing protein [Actinidia chinensis var. chinensis]
gene-CEY00_Acc18800	852	864	817	433	276	356	12.9773	13.318	11.6119	5.99594	4.18804	4.09122	6.06e-20	-1.26912	down	[E]	Amino acid transport and metabolism	Cellular Component: integral component of membrane (GO:0016021);; Molecular Function: transmembrane transporter activity (GO:0022857);;	K14638|5.1e-233|oeu:111411776|K14638 solute carrier family 15 (peptide/histidine transporter), member 3/4 | (RefSeq) protein NRT1/ PTR FAMILY 4.5-like	--	[E]	Amino acid transport and metabolism	POT family	Protein NRT1/ PTR FAMILY 4.5 OS=Arabidopsis thaliana OX=3702 GN=NPF4.5 PE=2 SV=1	E	Amino acid transport and metabolism	Protein NRT1/ PTR FAMILY 4.5 like, partial [Actinidia chinensis var. chinensis]
gene-CEY00_Acc19196	150	166	141	325	339	416	5.9291	6.63442	5.18721	11.6805	13.3627	12.4043	6.56e-12	1.02223	up	[O]	Posttranslational modification, protein turnover, chaperones	Molecular Function: transferase activity (GO:0016740);;	K00799|1.0e-87|pmum:103325843|K00799 glutathione S-transferase [EC:2.5.1.18] | (RefSeq) probable glutathione S-transferase parC	Glutathione metabolism (ko00480)	[O]	Posttranslational modification, protein turnover, chaperones	Glutathione S-transferase, N-terminal domain	Glutathione S-transferase 3 OS=Glycine max OX=3847 GN=GST3 PE=1 SV=1	O	Posttranslational modification, protein turnover, chaperones	Glutathione S-transferase, partial [Actinidia chinensis var. chinensis]
gene-CEY00_Acc14204	597	589	673	216	157	222	10.1542	10.1402	10.6789	3.33048	2.65546	2.84189	2.35e-39	-1.65734	down	[G]	Carbohydrate transport and metabolism	Molecular Function: polygalacturonase activity (GO:0004650);; Cellular Component: extracellular region (GO:0005576);; Biological Process: carbohydrate metabolic process (GO:0005975);; Biological Process: cell wall organization (GO:0071555);;	K01184|6.9e-173|pmum:103329840|K01184 polygalacturonase [EC:3.2.1.15] | (RefSeq) polygalacturonase At1g48100	Pentose and glucuronate interconversions (ko00040)	--	--	Glycosyl hydrolases family 28	Polygalacturonase At1g48100 OS=Arabidopsis thaliana OX=3702 GN=At1g48100 PE=2 SV=1	G	Carbohydrate transport and metabolism	Polygalacturonase [Actinidia chinensis var. chinensis]
gene-CEY00_Acc23377	9	16	12	85	79	89	0.097426	0.185476	0.12585	0.894954	0.910696	0.781202	3.35e-13	1.79663	up	--	--	Cellular Component: integral component of membrane (GO:0016021);;	K20890|9.3e-54|oeu:111370894|K20890 xylan alpha-glucuronosyltransferase [EC:2.4.1.-] | (RefSeq) UDP-glucuronate:xylan alpha-glucuronosyltransferase 1-like	--	[R]	General function prediction only	Domain of unknown function	--	L	Replication, recombination and repair	Ankyrin repeat-containing protein [Actinidia chinensis var. chinensis]
gene-CEY00_Acc25199	8349	7586	9354	2517	3260	4373	290.648	267.336	303.975	79.7111	113.073	114.915	2.49e-28	-1.36265	down	--	--	Cellular Component: photosystem I (GO:0009522);; Cellular Component: photosystem II (GO:0009523);; Cellular Component: chloroplast thylakoid membrane (GO:0009535);; Biological Process: photosynthesis, light harvesting (GO:0009765);; Cellular Component: integral component of membrane (GO:0016021);; Molecular Function: chlorophyll binding (GO:0016168);; Biological Process: protein-chromophore linka…	K08912|1.1e-139|gab:108489181|K08912 light-harvesting complex II chlorophyll a/b binding protein 1 | (RefSeq) chlorophyll a-b binding protein of LHCII type 1-like	Photosynthesis - antenna proteins (ko00196)	--	--	Chlorophyll A-B binding protein	Chlorophyll a-b binding protein 40, chloroplastic OS=Nicotiana tabacum OX=4097 GN=CAB40 PE=2 SV=1	C	Energy production and conversion	Chlorophyll a-b binding protein like [Actinidia chinensis var. chinensis]
gene-CEY00_Acc27732	20	26	52	117	89	116	0.363557	0.485909	0.914087	2.00465	1.66993	1.6416	2.48e-06	1.16392	up	--	--	Cellular Component: integral component of membrane (GO:0016021);; Molecular Function: transferase activity, transferring acyl groups (GO:0016746);;	K13508|4.2e-214|vvi:100261491|K13508 glycerol-3-phosphate acyltransferase [EC:2.3.1.15 2.3.1.198] | (RefSeq) glycerol-3-phosphate acyltransferase 5	Glycerolipid metabolism (ko00561);; Glycerophospholipid metabolism (ko00564)	--	--	Acyltransferase	Glycerol-3-phosphate acyltransferase 5 OS=Arabidopsis thaliana OX=3702 GN=GPAT5 PE=1 SV=1	I	Lipid transport and metabolism	Glycerol-3-phosphate acyltransferase [Actinidia chinensis var. chinensis]
gene-CEY00_Acc21847	128	127	131	38	56	63	2.72342	2.7347	2.60837	0.731116	1.1699	1.0092	2.19e-08	-1.16915	down	--	--	Cellular Component: nucleus (GO:0005634);; Molecular Function: zinc ion binding (GO:0008270);;	K12135|3.6e-07|crb:17882893|K12135 zinc finger protein CONSTANS | (RefSeq) zinc finger protein CONSTANS isoform X2	Circadian rhythm - plant (ko04712)	[K]	Transcription	CCT motif	Zinc finger protein CONSTANS-LIKE 16 OS=Arabidopsis thaliana OX=3702 GN=COL16 PE=1 SV=2	K	Transcription	Zinc finger protein like [Actinidia chinensis var. chinensis]
gene-CEY00_Acc07956	32	29	47	258	103	146	1.28596	1.17824	1.77647	9.56164	4.16652	4.49846	6.55e-10	1.50979	up	--	--	Molecular Function: kinase activity (GO:0016301);;	--	--	--	--	--	--	--	--	Tyrosine-protein kinase receptor Tie-1 like [Actinidia chinensis var. chinensis]
gene-CEY00_Acc30197	546	640	759	1864	1258	1657	9.9382	11.7911	12.8971	30.8767	22.8069	22.7662	1.95e-15	1.09309	up	[E]	Amino acid transport and metabolism	Biological Process: oligopeptide transport (GO:0006857);; Cellular Component: integral component of membrane (GO:0016021);; Molecular Function: transmembrane transporter activity (GO:0022857);;	K14638|2.3e-195|pxb:103943783|K14638 solute carrier family 15 (peptide/histidine transporter), member 3/4 | (RefSeq) protein NRT1/ PTR FAMILY 2.6-like	--	[E]	Amino acid transport and metabolism	POT family	Protein NRT1/ PTR FAMILY 2.7 OS=Arabidopsis thaliana OX=3702 GN=NPF2.7 PE=1 SV=1	E	Amino acid transport and metabolism	Protein NRT1/ PTR FAMILY 2.7 like [Actinidia chinensis var. chinensis]
Actinidia_chinensis_newGene_1496	510	465	505	2945	3143	3313	25.6714	23.6872	23.7645	135.1	157.869	126.077	5.32e-123	2.44378	up	--	--	--	--	--	--	--	--	Phylloplanin OS=Nicotiana tabacum OX=4097 PE=1 SV=1	S	Function unknown	Phylloplanin like [Actinidia chinensis var. chinensis]
gene-CEY00_Acc29251	74	67	63	389	432	479	1.48648	1.36285	1.17066	7.11085	8.6562	7.2685	7.63e-48	2.28354	up	--	--	Molecular Function: calmodulin binding (GO:0005516);;	--	--	--	--	Calmodulin binding protein-like	Protein SAR DEFICIENT 1 OS=Arabidopsis thaliana OX=3702 GN=SARD1 PE=1 SV=1	S	Function unknown	Protein SAR DEFICIENT like [Actinidia chinensis var. chinensis]
gene-CEY00_Acc18342	39	37	40	207	102	145	1.05198	0.997311	0.999902	5.1275	2.74593	2.97577	5.87e-10	1.41615	up	--	--	--	--	--	--	--	--	--	--	--	Eukaryotic peptide chain release factor GTP-binding subunit like [Actinidia chinensis var. chinensis]
gene-CEY00_Acc01377	56	55	61	218	148	188	1.82162	1.81557	1.85843	6.53858	4.85231	4.67972	1.81e-11	1.3196	up	--	--	Cellular Component: integral component of membrane (GO:0016021);;	--	--	--	--	Late embryogenesis abundant protein	Late embryogenesis abundant protein At1g64065 OS=Arabidopsis thaliana OX=3702 GN=At1g64065 PE=2 SV=1	S	Function unknown	Late embryogenesis abundant protein [Actinidia chinensis var. chinensis]
gene-CEY00_Acc01296	394	379	429	893	776	1078	14.9732	14.5833	15.2165	30.8731	29.3746	30.93	2.27e-22	1.01991	up	[J]	Translation, ribosomal structure and biogenesis	Molecular Function: structural constituent of ribosome (GO:0003735);; Cellular Component: ribosome (GO:0005840);; Biological Process: translation (GO:0006412);; Molecular Function: rRNA binding (GO:0019843);;	K02940|1.6e-98|csv:101216899|K02940 large subunit ribosomal protein L9e | (RefSeq) 60S ribosomal protein L9	Ribosome (ko03010)	[J]	Translation, ribosomal structure and biogenesis	Ribosomal protein L6	60S ribosomal protein L9 OS=Pisum sativum OX=3888 GN=RPL9 PE=2 SV=1	J	Translation, ribosomal structure and biogenesis	60S ribosomal protein [Actinidia chinensis var. chinensis]
Actinidia_chinensis_newGene_8123	163	139	166	501	549	603	1.86	1.61793	1.75315	5.21707	6.30662	5.1787	1.7e-30	1.57621	up	--	--	Molecular Function: molecular_function (GO:0003674);; Molecular Function: nucleic acid binding (GO:0003676);; Molecular Function: RNA binding (GO:0003723);; Molecular Function: catalytic activity (GO:0003824);; Molecular Function: nuclease activity (GO:0004518);; Molecular Function: endonuclease activity (GO:0004519);; Molecular Function: binding (GO:0005488);; Cellular Component: cellular_compon…	K19090|2.7e-09|fve:101300361|K19090 CRISPR-associated protein Cas5t | (RefSeq) putative pentatricopeptide repeat-containing protein At3g05240	--	[R]	General function prediction only	PPR repeat family	Pentatricopeptide repeat-containing protein At1g31430 OS=Arabidopsis thaliana OX=3702 GN=PCMP-E55 PE=2 SV=1	E	Amino acid transport and metabolism	hypothetical protein C5167_025826 [Papaver somniferum]
gene-CEY00_Acc26868	249	244	253	115	100	125	10.1859	10.0688	9.66502	4.26043	4.07602	3.85142	3.97e-13	-1.13872	down	--	--	--	K10839|7.4e-06|bdi:112271456|K10839 UV excision repair protein RAD23 | (RefSeq) ubiquitin receptor RAD23b-like isoform X1	Nucleotide excision repair (ko03420);; Protein processing in endoplasmic reticulum (ko04141)	--	--	--	--	--	--	MAGUK p55 subfamily member 4 like [Actinidia chinensis var. chinensis]
gene-CEY00_Acc16880	12	20	20	68	58	76	0.137727	0.236637	0.210917	0.725635	0.672602	0.6688	9.34e-07	1.25512	up	[T]	Signal transduction mechanisms	Molecular Function: ATP binding (GO:0005524);; Cellular Component: integral component of membrane (GO:0016021);; Molecular Function: ATPase activity (GO:0016887);;	K05681|1.3e-94|var:108331191|K05681 ATP-binding cassette, subfamily G (WHITE), member 2 | (RefSeq) ABC transporter G family member 5-like	ABC transporters (ko02010)	[Q]	Secondary metabolites biosynthesis, transport and catabolism	ABC-2 type transporter	ABC transporter G family member 20 OS=Arabidopsis thaliana OX=3702 GN=ABCG20 PE=2 SV=1	Q	Secondary metabolites biosynthesis, transport and catabolism	ABC transporter G family member 20 like [Actinidia chinensis var. chinensis]
gene-CEY00_Acc04901	428	444	449	248	188	212	12.2428	12.8844	12.0138	6.46972	5.36355	4.58665	2.2e-13	-1.05499	down	--	--	--	K00020|5.9e-15|mtr:MTR_8g088900|K00020 3-hydroxyisobutyrate dehydrogenase [EC:1.1.1.31] | (RefSeq) 6-phosphogluconate dehydrogenase-like protein	Valine, leucine and isoleucine degradation (ko00280)	--	--	Phosphate-induced protein 1 conserved region	Protein PHOSPHATE-INDUCED 1 OS=Nicotiana tabacum OX=4097 GN=PHI-1 PE=2 SV=1	S	Function unknown	Protein EXORDIUM like [Actinidia chinensis var. chinensis]
gene-CEY00_Acc02746	15	33	38	83	80	85	0.593835	1.37011	1.43701	3.09327	3.27254	2.62444	9.45e-05	1.00401	up	--	--	Molecular Function: electron carrier activity (GO:0009055);; Cellular Component: integral component of membrane (GO:0016021);;	--	--	--	--	Plastocyanin-like domain	Blue copper protein OS=Pisum sativum OX=3888 PE=2 SV=1	S	Function unknown	Blue copper protein [Actinidia chinensis var. chinensis]
gene-CEY00_Acc16578	88	49	75	347	379	548	3.00558	1.69498	2.39825	10.8318	12.9727	14.1964	8.54e-35	2.13497	up	--	--	Biological Process: immune system process (GO:0002376);; Cellular Component: cellular_component (GO:0005575);; Cellular Component: intracellular (GO:0005622);; Cellular Component: cell (GO:0005623);; Cellular Component: cytoplasm (GO:0005737);; Biological Process: response to stress (GO:0006950);; Biological Process: defense response (GO:0006952);; Biological Process: immune response (GO:0006955)…	K12173|4.6e-23|gmx:100794341|K12173 BRCA1-A complex subunit BRE | (RefSeq) BRISC and BRCA1-A complex member 2	Homologous recombination (ko03440)	--	--	Thaumatin family	Osmotin-like protein TPM-1 (Fragment) OS=Solanum lycopersicum OX=4081 GN=TPM-1 PE=2 SV=1	O	Posttranslational modification, protein turnover, chaperones	Osmotin-like protein [Actinidia chinensis var. chinensis]
gene-CEY00_Acc08390	68	102	83	359	220	238	2.28078	3.48014	2.611	11.024	7.39681	6.05254	3.15e-10	1.30045	up	--	--	Cellular Component: integral component of membrane (GO:0016021);;	--	--	--	--	Late embryogenesis abundant protein	NDR1/HIN1-like protein 3 OS=Arabidopsis thaliana OX=3702 GN=NHL3 PE=1 SV=1	S	Function unknown	NDR1/HIN1-Like protein [Actinidia chinensis var. chinensis]
gene-CEY00_Acc23700	25	32	33	93	78	79	0.444019	0.580714	0.553575	1.54237	1.40876	1.08789	3.23e-05	1.01709	up	--	--	Molecular Function: DNA binding (GO:0003677);; Cellular Component: nucleus (GO:0005634);;	K14491|7.6e-07|hbr:110641592|K14491 two-component response regulator ARR-B family | (RefSeq) uncharacterized protein LOC110641592	Plant hormone signal transduction (ko04075)	--	--	Myb-like DNA-binding domain	Probable transcription factor KAN4 OS=Arabidopsis thaliana OX=3702 GN=KAN4 PE=1 SV=1	K	Transcription	Transcription factor KAN4 [Actinidia chinensis var. chinensis]
gene-CEY00_Acc07326	4589	4029	4330	932	1290	1389	240.8	213.994	212.063	44.4868	67.4291	55.0244	1.89e-51	-1.8425	down	--	--	Molecular Function: DNA binding (GO:0003677);; Cellular Component: nucleus (GO:0005634);;	K15397|1.1e-24|cpep:111776416|K15397 3-ketoacyl-CoA synthase [EC:2.3.1.199] | (RefSeq) 3-ketoacyl-CoA synthase 17-like	Fatty acid elongation (ko00062);; Plant-pathogen interaction (ko04626)	[O]	Posttranslational modification, protein turnover, chaperones	Myb-like DNA-binding domain	Protein RADIALIS-like 1 OS=Arabidopsis thaliana OX=3702 GN=RL1 PE=2 SV=1	K	Transcription	Protein RADIALIS-like [Actinidia chinensis var. chinensis]
gene-CEY00_Acc13099	5	0	0	47	57	65	0.090185	0	0	0.789334	1.06011	0.910759	6.59e-15	2.0796	up	[P]	Inorganic ion transport and metabolism	Molecular Function: secondary active sulfate transmembrane transporter activity (GO:0008271);; Cellular Component: integral component of membrane (GO:0016021);;	K17471|2.1e-232|nta:107811699|K17471 sulfate transporter 3 | (RefSeq) probable sulfate transporter 3.5	--	[P]	Inorganic ion transport and metabolism	Sulfate permease family	Probable sulfate transporter 3.5 OS=Arabidopsis thaliana OX=3702 GN=SULTR3;5 PE=2 SV=1	P	Inorganic ion transport and metabolism	Sulfate transporter 3.5 like [Actinidia chinensis var. chinensis]
gene-CEY00_Acc21162	118	125	92	413	434	473	3.175	3.4016	2.30321	10.1361	11.6739	9.63906	3.08e-27	1.67692	up	[S]	Function unknown	Cellular Component: extracellular region (GO:0005576);;	K13449|3.1e-66|vvi:100265141|K13449 pathogenesis-related protein 1 | (RefSeq) basic form of pathogenesis-related protein 1-like	MAPK signaling pathway - plant (ko04016);; Plant hormone signal transduction (ko04075);; Plant-pathogen interaction (ko04626)	[S]	Function unknown	Cysteine-rich secretory protein family	Basic form of pathogenesis-related protein 1 OS=Nicotiana tabacum OX=4097 PE=3 SV=1	S	Function unknown	Basic form of pathogenesis-related protein like [Actinidia chinensis var. chinensis]
gene-CEY00_Acc28493	25	26	26	88	55	87	0.540119	0.580978	0.537218	1.78052	1.21497	1.4564	2.29e-05	1.05551	up	--	--	Molecular Function: DNA binding (GO:0003677);;	K09422|7.8e-86|qsu:112040952|K09422 transcription factor MYB, plant | (RefSeq) transcription factor MYB62-like	--	[K]	Transcription	Myb-like DNA-binding domain	Transcription factor MYB62 OS=Arabidopsis thaliana OX=3702 GN=MYB62 PE=2 SV=1	--	--	Transcription factor like [Actinidia chinensis var. chinensis]
gene-CEY00_Acc01293	134	103	145	71	25	47	2.63177	2.03345	2.65147	1.25587	0.476916	0.683021	1.37e-06	-1.15826	down	[G]	Carbohydrate transport and metabolism	Molecular Function: UDP-glycosyltransferase activity (GO:0008194);;	K13080|6.8e-121|vvi:100244875|K13080 flavanone 7-O-glucoside 2''-O-beta-L-rhamnosyltransferase [EC:2.4.1.236] | (RefSeq) flavanone 7-O-glucoside 2''-O-beta-L-rhamnosyltransferase	Flavonoid biosynthesis (ko00941);; Flavone and flavonol biosynthesis (ko00944)	[GC]	Carbohydrate transport and metabolism;; Energy production and conversion	UDP-glucoronosyl and UDP-glucosyl transferase	UDP-glucosyltransferase 29 OS=Panax ginseng OX=4054 GN=UGT29 PE=1 SV=1	--	--	Beta-D-glucosyl crocetin beta-1,6-glucosyltransferase [Actinidia chinensis var. chinensis]
gene-CEY00_Acc16579	102	115	87	432	322	352	3.57392	4.08086	2.85196	13.8637	11.3023	9.36627	9.11e-19	1.53363	up	--	--	--	K12173|5.9e-10|gmx:100794341|K12173 BRCA1-A complex subunit BRE | (RefSeq) BRISC and BRCA1-A complex member 2	Homologous recombination (ko03440)	--	--	Thaumatin family	Thaumatin-like protein OS=Actinidia deliciosa OX=3627 GN=tlp PE=1 SV=2	S	Function unknown	Thaumatin-like protein, partial [Actinidia chinensis var. chinensis]
gene-CEY00_Acc12738	127	111	121	1305	1159	1295	3.22884	2.86129	2.85376	30.229	29.4111	24.896	3.08e-131	3.05677	up	--	--	Molecular Function: iron ion binding (GO:0005506);; Cellular Component: cytoplasm (GO:0005737);; Biological Process: inositol catabolic process (GO:0019310);; Molecular Function: inositol oxygenase activity (GO:0050113);;	K00469|8.0e-158|jre:109021208|K00469 inositol oxygenase [EC:1.13.99.1] | (RefSeq) inositol oxygenase 1-like	Ascorbate and aldarate metabolism (ko00053);; Inositol phosphate metabolism (ko00562)	[R]	General function prediction only	Myo-inositol oxygenase	Inositol oxygenase 1 OS=Arabidopsis thaliana OX=3702 GN=MIOX1 PE=2 SV=1	L	Replication, recombination and repair	Inositol oxygenase [Actinidia chinensis var. chinensis]
gene-CEY00_Acc12443	118	163	142	437	415	528	2.63905	3.69604	2.96694	8.9306	9.27926	8.95197	1.83e-23	1.44794	up	--	--	Molecular Function: transferase activity, transferring acyl groups other than amino-acyl groups (GO:0016747);;	K13065|3.3e-88|pavi:110771447|K13065 shikimate O-hydroxycinnamoyltransferase [EC:2.3.1.133] | (RefSeq) BAHD acyltransferase At5g47980-like	Phenylpropanoid biosynthesis (ko00940);; Flavonoid biosynthesis (ko00941);; Stilbenoid, diarylheptanoid and gingerol biosynthesis (ko00945)	--	--	Transferase family	Vinorine synthase OS=Rauvolfia serpentina OX=4060 GN=ACT PE=1 SV=2	S	Function unknown	BAHD acyltransferase [Actinidia chinensis var. chinensis]
gene-CEY00_Acc05591	342	320	384	180	112	181	10.9569	10.3765	11.4645	5.23355	3.57248	4.35855	1.19e-13	-1.15636	down	--	--	Biological Process: cell division (GO:0051301);;	K15803|2.0e-06|qsu:111999375|K15803 (-)-germacrene D synthase [EC:4.2.3.75] | (RefSeq) (-)-germacrene D synthase-like	Sesquiterpenoid and triterpenoid biosynthesis (ko00909)	--	--	--	--	S	Function unknown	Biorientation of chromosomes in cell division protein [Actinidia chinensis var. chinensis]
gene-CEY00_Acc04162	12	11	5	55	52	66	0.480263	0.461072	0.197256	2.13285	2.20851	2.10308	1.4e-08	1.50421	up	--	--	Molecular Function: transferase activity (GO:0016740);;	K00799|7.8e-37|tcc:18603221|K00799 glutathione S-transferase [EC:2.5.1.18] | (RefSeq) glutathione transferase GST 23	Glutathione metabolism (ko00480)	[O]	Posttranslational modification, protein turnover, chaperones	--	Glutathione transferase GST 23 OS=Zea mays OX=4577 PE=2 SV=1	O	Posttranslational modification, protein turnover, chaperones	Glutathione S-transferase [Actinidia chinensis var. chinensis]
gene-CEY00_Acc18145	93	107	117	251	241	314	1.54847	1.80775	1.81687	3.82291	4.00992	3.96738	9.08e-12	1.09905	up	[T]	Signal transduction mechanisms	Molecular Function: protein kinase activity (GO:0004672);; Molecular Function: ATP binding (GO:0005524);;	K01968|6.9e-52|psom:113350054|K01968 3-methylcrotonyl-CoA carboxylase alpha subunit [EC:6.4.1.4] | (RefSeq) LOW QUALITY PROTEIN: methylcrotonoyl-CoA carboxylase subunit alpha, mitochondrial-like	Valine, leucine and isoleucine degradation (ko00280)	[T]	Signal transduction mechanisms	Protein tyrosine and serine/threonine kinase	Serine/threonine/tyrosine-protein kinase HT1 OS=Arabidopsis thaliana OX=3702 GN=HT1 PE=1 SV=1	T	Signal transduction mechanisms	Serine/threonine-protein kinase [Actinidia chinensis var. chinensis]
gene-CEY00_Acc23932	637	634	661	2332	1325	1566	17.6359	17.7585	17.092	58.7941	36.5778	32.7538	1.28e-13	1.19126	up	--	--	--	K00020|1.5e-21|mtr:MTR_8g088900|K00020 3-hydroxyisobutyrate dehydrogenase [EC:1.1.1.31] | (RefSeq) 6-phosphogluconate dehydrogenase-like protein	Valine, leucine and isoleucine degradation (ko00280)	--	--	Phosphate-induced protein 1 conserved region	Protein PHOSPHATE-INDUCED 1 OS=Nicotiana tabacum OX=4097 GN=PHI-1 PE=2 SV=1	L	Replication, recombination and repair	Protein EXORDIUM like [Actinidia chinensis var. chinensis]
gene-CEY00_Acc12073	80	85	121	39	37	44	3.84582	4.15581	5.46272	1.70767	1.78546	1.59403	3.69e-06	-1.06899	down	[QV]	Secondary metabolites biosynthesis, transport and catabolism;; Defense mechanisms	Molecular Function: monooxygenase activity (GO:0004497);; Molecular Function: iron ion binding (GO:0005506);; Molecular Function: oxidoreductase activity, acting on paired donors, with incorporation or reduction of molecular oxygen (GO:0016705);; Molecular Function: heme binding (GO:0020037);;	K13260|8.9e-68|cann:107867206|K13260 isoflavone/4'-methoxyisoflavone 2'-hydroxylase [EC:1.14.14.90 1.14.14.89] | (RefSeq) isoflavone 2'-hydroxylase-like	Isoflavonoid biosynthesis (ko00943)	[Q]	Secondary metabolites biosynthesis, transport and catabolism	Cytochrome P450	Cytochrome P450 81Q32 OS=Catharanthus roseus OX=4058 GN=CYP81Q32 PE=2 SV=1	Q	Secondary metabolites biosynthesis, transport and catabolism	Cytochrome P450 81D1 like, partial [Actinidia chinensis var. chinensis]
Actinidia_chinensis_newGene_3031	68	53	64	368	327	445	3.42383	2.68434	2.99017	16.8947	16.4154	16.9271	4.98e-46	2.23377	up	--	--	Molecular Function: protein phosphatase inhibitor activity (GO:0004864);; Biological Process: defense response (GO:0006952);; Biological Process: abscisic acid-activated signaling pathway (GO:0009738);; Molecular Function: abscisic acid binding (GO:0010427);; Molecular Function: signaling receptor activity (GO:0038023);;	K05387|5.3e-12|peq:110030824|K05387 glutamate receptor, ionotropic, plant | (RefSeq) LOW QUALITY PROTEIN: glutamate receptor 2.3-like	--	--	--	Pathogenesis-related protein Bet v 1 family	Major allergen Pru ar 1 OS=Prunus armeniaca OX=36596 PE=1 SV=1	S	Function unknown	Major allergen Pru ar like [Actinidia chinensis var. chinensis]
gene-CEY00_Acc08628	17	17	22	83	55	62	0.265832	0.265124	0.315968	1.2072	0.865311	0.740089	7.59e-06	1.16617	up	[DPM]	Cell cycle control, cell division, chromosome partitioning;; Inorganic ion transport and metabolism;; Cell wall/membrane/envelope biogenesis	Molecular Function: copper ion binding (GO:0005507);; Biological Process: lignin catabolic process (GO:0046274);; Cellular Component: apoplast (GO:0048046);; Molecular Function: hydroquinone:oxygen oxidoreductase activity (GO:0052716);;	K05909|1.8e-272|jre:108994944|K05909 laccase [EC:1.10.3.2] | (RefSeq) laccase-4-like	--	[Q]	Secondary metabolites biosynthesis, transport and catabolism	Multicopper oxidase	Laccase-4 OS=Arabidopsis thaliana OX=3702 GN=IRX12 PE=2 SV=2	Q	Secondary metabolites biosynthesis, transport and catabolism	Laccase-4 like [Actinidia chinensis var. chinensis]
gene-CEY00_Acc29873	34	33	39	149	106	116	1.00287	0.967509	1.06728	4.0049	3.11418	2.58469	3.04e-09	1.32685	up	--	--	Molecular Function: calcium ion binding (GO:0005509);;	K02183|7.6e-19|zju:107429008|K02183 calmodulin | (RefSeq) probable calcium-binding protein CML30	MAPK signaling pathway - plant (ko04016);; Phosphatidylinositol signaling system (ko04070);; Plant-pathogen interaction (ko04626)	[T]	Signal transduction mechanisms	EF hand	Probable calcium-binding protein CML45 OS=Arabidopsis thaliana OX=3702 GN=CML45 PE=2 SV=1	T	Signal transduction mechanisms	Calcium-binding protein CML30 [Actinidia chinensis var. chinensis]
gene-CEY00_Acc03034	89	102	146	44	42	68	3.63381	4.21741	5.58425	1.64652	1.71999	2.08893	1.06e-05	-1.00115	down	--	--	--	--	--	--	--	--	--	S	Function unknown	Transcription factor bHLH61 like [Actinidia chinensis var. chinensis]
gene-CEY00_Acc23528	1079	996	1072	417	394	548	22.7226	21.2265	21.0647	7.98653	8.26613	8.70554	1.16e-37	-1.28909	down	[O]	Posttranslational modification, protein turnover, chaperones	--	K17609|1.7e-182|vvi:100262541|K17609 nucleoredoxin [EC:1.8.1.8] | (RefSeq) probable nucleoredoxin 2	--	[R]	General function prediction only	Thioredoxin-like	Probable nucleoredoxin 2 OS=Oryza sativa subsp. japonica OX=39947 GN=Os01g0794400 PE=2 SV=1	O	Posttranslational modification, protein turnover, chaperones	Nucleoredoxin like [Actinidia chinensis var. chinensis]
gene-CEY00_Acc06816	34	46	39	118	120	154	0.462176	0.639801	0.500502	1.46857	1.63401	1.59949	9.86e-10	1.29259	up	--		Molecular Function: protein kinase activity (GO:0004672);; Molecular Function: ATP binding (GO:0005524);; Cellular Component: integral component of membrane (GO:0016021);; Molecular Function: carbohydrate binding (GO:0030246);;	K22133|1.4e-93|egr:104443802|K22133 oxalate---CoA ligase [EC:6.2.1.8] | (RefSeq) oxalate--CoA ligase	Glyoxylate and dicarboxylate metabolism (ko00630)	--	--	Legume lectin domain	L-type lectin-domain containing receptor kinase IX.1 OS=Arabidopsis thaliana OX=3702 GN=LECRK91 PE=1 SV=1	T	Signal transduction mechanisms	Legume lectin domain protein [Actinidia chinensis var. chinensis]
gene-CEY00_Acc31505	9	4	7	78	39	64	0.226789	0.090314	0.167458	1.85887	1.00948	1.27399	3.31e-10	1.67996	up	--	--	Molecular Function: DNA binding (GO:0003677);; Cellular Component: nucleus (GO:0005634);; Biological Process: regulation of transcription, DNA-templated (GO:0006355);;	K00521|5.1e-42|cmos:111447866|K00521 ferric-chelate reductase [EC:1.16.1.7] | (RefSeq) ferric reduction oxidase 7, chloroplastic-like	--	--	--	No apical meristem (NAM) protein	NAC domain-containing protein 1 OS=Solanum lycopersicum OX=4081 GN=NAP1 PE=2 SV=1	K	Transcription	NAC transcription factor [Actinidia chinensis var. chinensis]
gene-CEY00_Acc27278	9	5	11	44	88	71	0.152265	0.089126	0.180133	0.693744	1.53582	0.943558	6.35e-10	1.6498	up	[C]	Energy production and conversion	Molecular Function: oxidoreductase activity (GO:0016491);; Molecular Function: FAD binding (GO:0071949);;	K22395|3.9e-192|nau:109214673|K22395 cinnamyl-alcohol dehydrogenase [EC:1.1.1.195] | (RefSeq) berberine bridge enzyme-like 28	Phenylpropanoid biosynthesis (ko00940)	--	--	FAD binding domain	Berberine bridge enzyme-like 23 OS=Arabidopsis thaliana OX=3702 GN=At5g44360 PE=2 SV=1	C	Energy production and conversion	Berberine bridge enzyme-like [Actinidia chinensis var. chinensis]
gene-CEY00_Acc28684	2080	1991	2100	5429	4296	5769	44.8121	43.4155	42.226	106.441	92.2222	93.8218	3.92e-43	1.16929	up	--	--	Molecular Function: transferase activity, transferring acyl groups other than amino-acyl groups (GO:0016747);;	K19861|3.5e-149|vvi:100263045|K19861 benzyl alcohol O-benzoyltransferase [EC:2.3.1.196 2.3.1.232] | (RefSeq) methanol O-anthraniloyltransferase	--	--	--	Transferase family	Methanol O-anthraniloyltransferase OS=Vitis labrusca OX=103355 GN=AMAT PE=1 SV=1	S	Function unknown	Methanol O-anthraniloyltransferase [Actinidia chinensis var. chinensis]
gene-CEY00_Acc31512	6	11	10	100	56	68	0.114096	0.218039	0.168342	1.77528	1.09496	1.00613	1.31e-11	1.7639	up	--	--	Molecular Function: DNA binding (GO:0003677);; Cellular Component: nucleus (GO:0005634);;	K09422|5.1e-85|vvi:100253313|K09422 transcription factor MYB, plant | (RefSeq) transcription factor RAX1	--	[K]	Transcription	Myb-like DNA-binding domain	Transcription factor CSA OS=Oryza sativa subsp. japonica OX=39947 GN=CSA PE=2 SV=2	--	--	Transcription factor like [Actinidia chinensis var. chinensis]
gene-CEY00_Acc31410	31	47	48	12	12	14	0.751911	1.1693	1.08793	0.249923	0.28612	0.258897	5.87e-05	-1.11055	down	--	--	Cellular Component: nucleus (GO:0005634);; Biological Process: regulation of transcription, DNA-templated (GO:0006355);; Molecular Function: sequence-specific DNA binding (GO:0043565);;	K09338|2.1e-65|ccaj:109808273|K09338 homeobox-leucine zipper protein | (RefSeq) homeobox-leucine zipper protein HAT5-like	--	[K]	Transcription	Homeodomain	Homeobox-leucine zipper protein HAT5 OS=Arabidopsis thaliana OX=3702 GN=HAT5 PE=1 SV=1	K	Transcription	Homeobox-leucine zipper protein [Actinidia chinensis var. chinensis]
gene-CEY00_Acc03523	1349	1301	1456	742	565	703	23.1208	22.5736	23.2923	11.5722	9.64417	9.09882	3.61e-24	-1.09907	down	[Q]	Secondary metabolites biosynthesis, transport and catabolism	Molecular Function: oxidoreductase activity (GO:0016491);; Molecular Function: metal ion binding (GO:0046872);;	K05282|6.7e-178|nto:104104554|K05282 gibberellin-44 dioxygenase [EC:1.14.11.12] | (RefSeq) gibberellin 20 oxidase 1-like	Diterpenoid biosynthesis (ko00904)	[QR]	Secondary metabolites biosynthesis, transport and catabolism;; General function prediction only	2OG-Fe(II) oxygenase superfamily	Gibberellin 20 oxidase 1 OS=Arabidopsis thaliana OX=3702 GN=GA20OX1 PE=2 SV=2	Q	Secondary metabolites biosynthesis, transport and catabolism	Gibberellin 20 oxidase [Actinidia chinensis var. chinensis]
gene-CEY00_Acc20480	1119	908	1071	610	355	593	22.0465	18.1138	19.7002	10.9267	6.95497	8.81516	2.65e-13	-1.03921	down	--	--	Molecular Function: UDP-glycosyltransferase activity (GO:0008194);;	K13496|6.2e-160|oeu:111381063|K13496 UDP-glucosyltransferase 73C [EC:2.4.1.-] | (RefSeq) UDP-glycosyltransferase 73C5-like	Zeatin biosynthesis (ko00908)	[GC]	Carbohydrate transport and metabolism;; Energy production and conversion	UDP-glucoronosyl and UDP-glucosyl transferase	UDP-glycosyltransferase 73C3 OS=Arabidopsis thaliana OX=3702 GN=UGT73C3 PE=2 SV=1	--	--	UDP-glycosyltransferase [Actinidia chinensis var. chinensis]
gene-CEY00_Acc20977	317	334	355	920	874	1242	6.02496	6.42636	6.30125	15.924	16.5495	17.8343	5.05e-38	1.39481	up	[QV]	Secondary metabolites biosynthesis, transport and catabolism;; Defense mechanisms	Molecular Function: monooxygenase activity (GO:0004497);; Molecular Function: iron ion binding (GO:0005506);; Molecular Function: oxidoreductase activity, acting on paired donors, with incorporation or reduction of molecular oxygen (GO:0016705);; Molecular Function: heme binding (GO:0020037);;	K20667|5.1e-215|sind:105175834|K20667 beta-amyrin 28-monooxygenase [EC:1.14.14.126] | (RefSeq) beta-amyrin 28-oxidase	--	[QI]	Secondary metabolites biosynthesis, transport and catabolism;; Lipid transport and metabolism	Cytochrome P450	Beta-amyrin 28-monooxygenase OS=Medicago truncatula OX=3880 GN=CYP716A12 PE=1 SV=1	Q	Secondary metabolites biosynthesis, transport and catabolism	Beta-amyrin 28-oxidase [Actinidia chinensis var. chinensis]
gene-CEY00_Acc14348	99	85	92	244	163	294	2.51061	2.19187	2.18097	5.65721	4.12199	5.65535	7.17e-09	1.05158	up	[G]	Carbohydrate transport and metabolism	Molecular Function: hydrolase activity, hydrolyzing O-glycosyl compounds (GO:0004553);; Cellular Component: cell wall (GO:0005618);; Biological Process: xyloglucan metabolic process (GO:0010411);; Molecular Function: xyloglucan:xyloglucosyl transferase activity (GO:0016762);; Biological Process: cell wall biogenesis (GO:0042546);; Cellular Component: apoplast (GO:0048046);; Biological Process: ce…	K08235|4.7e-163|mesc:110620112|K08235 xyloglucan:xyloglucosyl transferase [EC:2.4.1.207] | (RefSeq) probable xyloglucan endotransglucosylase/hydrolase protein B	--	--	--	Glycosyl hydrolases family 16	Probable xyloglucan endotransglucosylase/hydrolase protein B OS=Phaseolus angularis OX=3914 GN=XTHB PE=2 SV=1	G	Carbohydrate transport and metabolism	xyloglucan endotransglucosylase/hydrolase 5 [Actinidia deliciosa]
gene-CEY00_Acc18753	58	67	83	325	234	350	0.727055	0.850803	0.970671	3.73281	2.94199	3.33484	1.94e-24	1.75189	up	[M]	Cell wall/membrane/envelope biogenesis	Molecular Function: protein kinase activity (GO:0004672);; Molecular Function: calcium ion binding (GO:0005509);; Molecular Function: ATP binding (GO:0005524);; Molecular Function: polysaccharide binding (GO:0030247);;	K23544|5.9e-143|brp:103842861|K23544 serine incorporator 1/3 | (RefSeq) serine incorporator 3	--	--	--	Protein tyrosine and serine/threonine kinase	Wall-associated receptor kinase-like 22 OS=Arabidopsis thaliana OX=3702 GN=WAKL22 PE=2 SV=1	T	Signal transduction mechanisms	Wall-associated receptor kinase-like [Actinidia chinensis var. chinensis]
gene-CEY00_Acc14394	10	4	7	45	33	57	0.221586	0.090636	0.137455	0.950084	0.745987	0.9978	5.9e-07	1.37179	up	[W]	Extracellular structures	Molecular Function: protein tyrosine kinase activity (GO:0004713);; Molecular Function: ATP binding (GO:0005524);;	K13436|4.3e-142|cmax:111479410|K13436 pto-interacting protein 1 [EC:2.7.11.1] | (RefSeq) PTI1-like tyrosine-protein kinase 3	Plant-pathogen interaction (ko04626)	[T]	Signal transduction mechanisms	Protein tyrosine and serine/threonine kinase	Probable protein kinase At2g41970 OS=Arabidopsis thaliana OX=3702 GN=At2g41970 PE=2 SV=1	T	Signal transduction mechanisms	Protein kinase [Actinidia chinensis var. chinensis]
gene-CEY00_Acc24397	41	47	59	314	250	353	1.05997	1.22714	1.41384	7.38724	6.44576	6.8929	7.49e-37	2.18758	up	[G]	Carbohydrate transport and metabolism	Molecular Function: chitinase activity (GO:0004568);; Biological Process: carbohydrate metabolic process (GO:0005975);; Biological Process: chitin catabolic process (GO:0006032);; Molecular Function: chitin binding (GO:0008061);; Biological Process: cell wall macromolecule catabolic process (GO:0016998);;	K20547|9.7e-154|vvi:100266184|K20547 basic endochitinase B [EC:3.2.1.14] | (RefSeq) basic endochitinase	Amino sugar and nucleotide sugar metabolism (ko00520);; MAPK signaling pathway - plant (ko04016)	[R]	General function prediction only	Chitinase class I	Basic endochitinase OS=Vitis vinifera OX=29760 GN=CHIT1B PE=2 SV=1	U	Intracellular trafficking, secretion, and vesicular transport	Basic endochitinase [Actinidia chinensis var. chinensis]
gene-CEY00_Acc29474	0	0	0	39	38	44	0	0	0	0.337901	0.358933	0.3216	1.6e-13	1.9794	up	--	--	Molecular Function: lipid binding (GO:0008289);;	--	--	--	--	Protein of unknown function (DUF1336)	Protein ENHANCED DISEASE RESISTANCE 2 OS=Arabidopsis thaliana OX=3702 GN=EDR2 PE=2 SV=1	T	Signal transduction mechanisms	Protein ENHANCED DISEASE RESISTANCE like [Actinidia chinensis var. chinensis]
gene-CEY00_Acc25505	33	48	74	184	180	187	1.66235	2.4443	3.48053	8.51929	9.12986	7.16606	1.05e-10	1.38369	up	--	--	Biological Process: response to reactive oxygen species (GO:0000302);; Biological Process: response to acid chemical (GO:0001101);; Biological Process: regulation of response to biotic stimulus (GO:0002831);; Cellular Component: cellular_component (GO:0005575);; Cellular Component: intracellular (GO:0005622);; Cellular Component: cell (GO:0005623);; Cellular Component: nucleus (GO:0005634);; Cell…	--	--	--	--	Late embryogenesis abundant protein	Late embryogenesis abundant protein Lea5 OS=Citrus sinensis OX=2711 GN=LEA5 PE=2 SV=1	S	Function unknown	Late embryogenesis abundant protein like [Actinidia chinensis var. chinensis]
gene-CEY00_Acc30095	9	10	17	83	49	70	0.208138	0.229146	0.356677	1.7375	1.11448	1.22139	1.32e-08	1.48808	up	[IR]	Lipid transport and metabolism;; General function prediction only	Biological Process: lipid metabolic process (GO:0006629);; Molecular Function: lipase activity (GO:0016298);;	K00679|2.2e-159|cic:CICLE_v10027727mg|K00679 phospholipid:diacylglycerol acyltransferase [EC:2.3.1.158] | (RefSeq) hypothetical protein	Glycerolipid metabolism (ko00561)	--	--	GDSL-like Lipase/Acylhydrolase	GDSL esterase/lipase At5g22810 OS=Arabidopsis thaliana OX=3702 GN=At5g22810 PE=3 SV=3	L	Replication, recombination and repair	GDSL esterase/lipase [Actinidia chinensis var. chinensis]
gene-CEY00_Acc26421	41	40	26	145	135	180	0.707961	0.699549	0.424023	2.31555	2.37214	2.39515	1.88e-14	1.59702	up	[V]	Defense mechanisms	Molecular Function: antiporter activity (GO:0015297);; Cellular Component: integral component of membrane (GO:0016021);; Molecular Function: xenobiotic transporter activity (GO:0042910);;	K03327|2.4e-137|jre:109013182|K03327 multidrug resistance protein, MATE family | (RefSeq) protein DETOXIFICATION 18-like	--	[R]	General function prediction only	MatE	Protein DETOXIFICATION 19 OS=Arabidopsis thaliana OX=3702 GN=DTX19 PE=2 SV=1	V	Defense mechanisms	Protein DETOXIFICATION like [Actinidia chinensis var. chinensis]
gene-CEY00_Acc24030	57	37	46	14	18	19	1.38523	0.91447	1.04915	0.294646	0.433062	0.336343	0.000225823	-1.00895	down	--	--	Cellular Component: integral component of membrane (GO:0016021);; Molecular Function: transmembrane transporter activity (GO:0022857);;	K17500|2.9e-58|nto:104085001|K17500 integrin-linked kinase-associated serine/threonine phosphatase 2C [EC:3.1.3.16] | (RefSeq) WAT1-related protein At3g18200 isoform X1	--	--	--	EamA-like transporter family	WAT1-related protein At1g43650 OS=Arabidopsis thaliana OX=3702 GN=At1g43650 PE=2 SV=1	S	Function unknown	WAT1-related protein [Actinidia chinensis var. chinensis]
gene-CEY00_Acc14955	2407	2214	2182	1075	889	1157	42.821	39.868	36.2311	17.3996	15.7475	15.5377	1.9e-38	-1.20777	down	[Q]	Secondary metabolites biosynthesis, transport and catabolism	Molecular Function: cellulase activity (GO:0008810);; Biological Process: cellulose catabolic process (GO:0030245);;	K01179|1.4e-186|fve:101312726|K01179 endoglucanase [EC:3.2.1.4] | (RefSeq) endoglucanase 6	Starch and sucrose metabolism (ko00500)	--	--	Glycosyl hydrolase family 9	Endoglucanase 11 OS=Arabidopsis thaliana OX=3702 GN=At2g32990 PE=2 SV=1	G	Carbohydrate transport and metabolism	Endoglucanase [Actinidia chinensis var. chinensis]
Actinidia_chinensis_newGene_5101	9	15	11	57	75	57	0.385677	0.637743	0.453546	2.30436	3.30892	1.90674	5.93e-08	1.4362	up	--	--	Cellular Component: monolayer-surrounded lipid storage body (GO:0012511);; Cellular Component: integral component of membrane (GO:0016021);;	--	--	--	--	Oleosin	Oleosin L OS=Sesamum indicum OX=4182 PE=1 SV=1	S	Function unknown	Oleosin like [Actinidia chinensis var. chinensis]
Actinidia_chinensis_newGene_2929	70	78	62	25	11	29	1.65358	1.85647	1.35803	0.52761	0.25407	0.504976	5e-07	-1.27559	down	[IQR]	Lipid transport and metabolism;; Secondary metabolites biosynthesis, transport and catabolism;; General function prediction only	Molecular Function: oxidoreductase activity (GO:0016491);;	K08081|3.5e-29|mtr:MTR_7g063270|K08081 tropinone reductase I [EC:1.1.1.206] | (RefSeq) NAD(P)-binding rossmann-fold protein	Tropane, piperidine and pyridine alkaloid biosynthesis (ko00960)	[R]	General function prediction only	Enoyl-(Acyl carrier protein) reductase	NADPH-dependent aldehyde reductase 1, chloroplastic OS=Arabidopsis thaliana OX=3702 GN=ChlADR1 PE=1 SV=1	Q	Secondary metabolites biosynthesis, transport and catabolism	NADPH-dependent aldehyde reductase 1, chloroplastic isoform X2 [Solanum pennellii]
gene-CEY00_Acc24256	148	169	158	484	427	548	2.91329	3.36354	2.90051	8.68904	8.39321	8.16715	1.23e-25	1.39031	up	[R]	General function prediction only	Molecular Function: protein serine/threonine kinase activity (GO:0004674);; Molecular Function: ATP binding (GO:0005524);; Cellular Component: integral component of membrane (GO:0016021);;	K01180|4.0e-62|cmax:111487562|K01180 endo-1,3(4)-beta-glucanase [EC:3.2.1.6] | (RefSeq) uncharacterized protein LOC111487562	--	--	--	Protein kinase domain	Cysteine-rich receptor-like protein kinase 2 OS=Arabidopsis thaliana OX=3702 GN=CRK2 PE=1 SV=1	T	Signal transduction mechanisms	LRR receptor-like serine/threonine-protein kinase [Actinidia chinensis var. chinensis]
gene-CEY00_Acc17359	126	139	146	425	358	435	1.56427	1.74769	1.69896	4.83074	4.44955	4.10374	1.85e-20	1.33035	up	--	--	Molecular Function: magnesium ion binding (GO:0000287);; Molecular Function: terpene synthase activity (GO:0010333);;	K17982|7.4e-277|vvi:100255330|K17982 geranyllinalool synthase [EC:4.2.3.144] | (RefSeq) P(E)-nerolidol/(E,E)-geranyl linalool synthase	Diterpenoid biosynthesis (ko00904)	--	--	Terpene synthase family, metal binding domain	(E,E)-geranyllinalool synthase OS=Arabidopsis thaliana OX=3702 GN=GES PE=1 SV=1	S	Function unknown	(E,E)-geranyllinalool synthase [Actinidia chinensis var. chinensis]
gene-CEY00_Acc13851	108	156	185	39	53	66	4.1823	6.15945	6.7183	1.38307	2.04742	1.91585	2.27e-09	-1.30338	down	--	--	Molecular Function: electron carrier activity (GO:0009055);;	--	--	--	--	Plastocyanin-like domain	Early nodulin-like protein 1 OS=Oryza sativa subsp. japonica OX=39947 GN=ENODL1 PE=1 SV=1	S	Function unknown	Early nodulin-like protein [Actinidia chinensis var. chinensis]
gene-CEY00_Acc22438	1061	933	1127	2968	2076	2397	30.2571	26.9179	29.9935	77.0085	58.964	51.5859	2.58e-16	1.06874	up	--	--	Molecular Function: transcription factor activity, sequence-specific DNA binding (GO:0003700);; Cellular Component: nucleus (GO:0005634);; Molecular Function: sequence-specific DNA binding (GO:0043565);;	K13424|5.2e-18|ccaj:109816325|K13424 WRKY transcription factor 33 | (RefSeq) probable WRKY transcription factor 33	MAPK signaling pathway - plant (ko04016);; Plant-pathogen interaction (ko04626)	--	--	WRKY DNA -binding domain	Probable WRKY transcription factor 40 OS=Arabidopsis thaliana OX=3702 GN=WRKY40 PE=1 SV=1	K	Transcription	WRKY transcription factor 40 [Actinidia chinensis var. chinensis]
gene-CEY00_Acc21205	65	48	65	159	160	189	1.2104	0.904489	1.12888	2.68597	2.96073	2.65395	7.95e-10	1.18592	up	[E]	Amino acid transport and metabolism	Molecular Function: transaminase activity (GO:0008483);; Biological Process: biosynthetic process (GO:0009058);; Molecular Function: pyridoxal phosphate binding (GO:0030170);;	K10206|1.4e-198|dcr:108226101|K10206 LL-diaminopimelate aminotransferase [EC:2.6.1.83] | (RefSeq) aminotransferase ALD1-like	Lysine biosynthesis (ko00300);; Biosynthesis of amino acids (ko01230)	[E]	Amino acid transport and metabolism	Aminotransferase class I and II	Aminotransferase ALD1, chloroplastic OS=Arabidopsis thaliana OX=3702 GN=ALD1 PE=1 SV=2	E	Amino acid transport and metabolism	Aminotransferase [Actinidia chinensis var. chinensis]
gene-CEY00_Acc17110	5856	5529	5749	17853	15605	20215	110.601	105.714	101.355	306.852	293.697	288.253	1.13e-99	1.49287	up	[G]	Carbohydrate transport and metabolism	Molecular Function: hydrolase activity, hydrolyzing O-glycosyl compounds (GO:0004553);; Biological Process: carbohydrate metabolic process (GO:0005975);;	K22279|5.2e-165|qsu:111985157|K22279 vicianin beta-glucosidase [EC:3.2.1.119] | (RefSeq) vicianin hydrolase-like isoform X1	--	[G]	Carbohydrate transport and metabolism	Glycosyl hydrolase family 1	Beta-glucosidase 12 OS=Oryza sativa subsp. japonica OX=39947 GN=BGLU12 PE=1 SV=2	G	Carbohydrate transport and metabolism	Beta-glucosidase, partial [Actinidia chinensis var. chinensis]
gene-CEY00_Acc30592	401	401	413	201	126	189	9.14668	9.26235	8.80581	4.16237	2.84792	3.24702	3.87e-17	-1.24768	down	[IR]	Lipid transport and metabolism;; General function prediction only	Cellular Component: plant-type cell wall (GO:0009505);; Cellular Component: plasmodesma (GO:0009506);; Molecular Function: hydrolase activity, acting on ester bonds (GO:0016788);;	K01206|5.9e-102|thj:104825554|K01206 alpha-L-fucosidase [EC:3.2.1.51] | (RefSeq) alpha-L-fucosidase 3	Other glycan degradation (ko00511)	--	--	GDSL-like Lipase/Acylhydrolase	GDSL esterase/lipase At5g14450 OS=Arabidopsis thaliana OX=3702 GN=At5g14450 PE=2 SV=1	S	Function unknown	GDSL esterase/lipase [Actinidia chinensis var. chinensis]
gene-CEY00_Acc03820	12	13	11	64	63	95	0.485536	0.513506	0.382374	2.37438	2.52533	2.92175	5.36e-11	1.65193	up	--	--	--	--	--	--	--	Gibberellin regulated protein	--	S	Function unknown	GTPase [Actinidia chinensis var. chinensis]
gene-CEY00_Acc29534	85	75	60	207	223	230	1.95445	1.75066	1.29448	4.3575	5.14163	4.0256	1.31e-11	1.26359	up	[Q]	Secondary metabolites biosynthesis, transport and catabolism	Molecular Function: oxidoreductase activity (GO:0016491);; Molecular Function: metal ion binding (GO:0046872);;	K24028|1.4e-26|dzi:111317441|K24028 salicylic acid 3-hydroxylase [EC:1.14.11.-] | (RefSeq) protein DOWNY MILDEW RESISTANCE 6-like	--	[QR]	Secondary metabolites biosynthesis, transport and catabolism;; General function prediction only	2OG-Fe(II) oxygenase superfamily	Probable 2-oxoglutarate-dependent dioxygenase ANS OS=Arabidopsis thaliana OX=3702 GN=ANS PE=2 SV=1	Q	Secondary metabolites biosynthesis, transport and catabolism	Flavonol synthase/flavanone 3-hydroxylase [Actinidia chinensis var. chinensis]
gene-CEY00_Acc18978	21	36	32	104	96	113	0.728078	1.30001	1.04701	3.35525	3.40072	3.05029	1.91e-08	1.2963	up	--	--	Molecular Function: DNA binding (GO:0003677);; Biological Process: regulation of transcription from RNA polymerase II promoter (GO:0006357);; Molecular Function: protein dimerization activity (GO:0046983);;	--	--	--	--	Helix-loop-helix DNA-binding domain	Transcription factor bHLH162 OS=Arabidopsis thaliana OX=3702 GN=BHLH162 PE=1 SV=1	K	Transcription	Transcription factor bHLH36 like [Actinidia chinensis var. chinensis]
Actinidia_chinensis_newGene_1188	96	88	85	34	32	56	1.22611	1.13564	1.0133	0.394107	0.400007	0.540765	1.3e-05	-1.00532	down	--	--	Molecular Function: protein dimerization activity (GO:0046983);;	--	--	--	--	hAT family C-terminal dimerisation region	--	S	Function unknown	uncharacterized protein LOC114300362 [Camellia sinensis]
Actinidia_chinensis_newGene_3508	6	9	15	55	74	81	0.274613	0.414404	0.639239	2.32336	3.39672	2.82319	1.68e-10	1.66135	up	--	--	--	--	--	--	--	Probable lipid transfer	--	S	Function unknown	Lipid transfer-like protein [Actinidia chinensis var. chinensis]
gene-CEY00_Acc27268	777	739	664	381	318	402	7.95657	7.66001	6.34457	3.55157	3.239	3.10993	4.4e-18	-1.04926	down	[G]	Carbohydrate transport and metabolism	Molecular Function: ATP binding (GO:0005524);; Biological Process: pyruvate metabolic process (GO:0006090);; Molecular Function: kinase activity (GO:0016301);; Molecular Function: metal ion binding (GO:0046872);; Molecular Function: pyruvate, phosphate dikinase activity (GO:0050242);;	K01006|0.0e+00|mdm:103453016|K01006 pyruvate, orthophosphate dikinase [EC:2.7.9.1] | (RefSeq) pyruvate, phosphate dikinase, chloroplastic	Glycolysis / Gluconeogenesis (ko00010);; Pyruvate metabolism (ko00620);; Carbon fixation in photosynthetic organisms (ko00710);; Carbon metabolism (ko01200)	--	--	PEP-utilising enzyme, PEP-binding domain	Pyruvate, phosphate dikinase, chloroplastic OS=Mesembryanthemum crystallinum OX=3544 GN=PPD PE=2 SV=1	T	Signal transduction mechanisms	Pyruvate, phosphate dikinase [Actinidia chinensis var. chinensis]
gene-CEY00_Acc05690	151	165	195	72	61	79	3.78568	4.18617	4.58108	1.63362	1.50787	1.49394	1.11e-10	-1.20132	down	--	--	Cellular Component: integral component of membrane (GO:0016021);; Molecular Function: transmembrane transporter activity (GO:0022857);;	K17500|9.7e-38|nto:104085001|K17500 integrin-linked kinase-associated serine/threonine phosphatase 2C [EC:3.1.3.16] | (RefSeq) WAT1-related protein At3g18200 isoform X1	--	--	--	EamA-like transporter family	WAT1-related protein At5g40230 OS=Arabidopsis thaliana OX=3702 GN=At5g40230 PE=3 SV=1	S	Function unknown	WAT1-related protein [Actinidia chinensis var. chinensis]
gene-CEY00_Acc12242	236	266	252	97	57	71	12.5954	14.4062	12.5433	4.7059	3.0139	2.85003	1.54e-18	-1.6051	down	--	--	--	--	--	--	--	ABA/WDS induced protein	--	--	--	Abscisic stress-ripening protein [Actinidia chinensis var. chinensis]
gene-CEY00_Acc14842	108	96	82	39	41	48	2.52334	2.25132	1.78433	0.825856	0.938082	0.84065	7.24e-06	-1.01742	down	[P]	Inorganic ion transport and metabolism	Molecular Function: cation transmembrane transporter activity (GO:0008324);; Cellular Component: integral component of membrane (GO:0016021);;	K14689|9.5e-137|vvi:100255391|K14689 solute carrier family 30 (zinc transporter), member 2 | (RefSeq) metal tolerance protein B	--	[P]	Inorganic ion transport and metabolism	Cation efflux family	Metal tolerance protein 1 OS=Arabidopsis thaliana OX=3702 GN=MTP1 PE=1 SV=2	P	Inorganic ion transport and metabolism	Metal tolerance protein like [Actinidia chinensis var. chinensis]
gene-CEY00_Acc10796	566	530	536	1624	1364	1741	9.03109	8.56034	7.98353	23.5903	21.6912	20.9795	2.23e-44	1.35946	up	--	--	Cellular Component: integral component of membrane (GO:0016021);;	--	--	--	--	Nodulin-like	Protein NUCLEAR FUSION DEFECTIVE 4 OS=Arabidopsis thaliana OX=3702 GN=NFD4 PE=3 SV=1	S	Function unknown	Protein NUCLEAR FUSION DEFECTIVE like [Actinidia chinensis var. chinensis]
gene-CEY00_Acc19200	219	317	272	85	68	59	3.17087	4.6639	3.68281	1.12008	0.976134	0.640931	7.14e-19	-1.71283	down	[Q]	Secondary metabolites biosynthesis, transport and catabolism	Molecular Function: oxidoreductase activity, acting on single donors with incorporation of molecular oxygen, incorporation of two atoms of oxygen (GO:0016702);; Molecular Function: metal ion binding (GO:0046872);;	K09840|1.2e-255|tcc:18594534|K09840 9-cis-epoxycarotenoid dioxygenase [EC:1.13.11.51] | (RefSeq) 9-cis-epoxycarotenoid dioxygenase NCED3, chloroplastic	Carotenoid biosynthesis (ko00906)	[Q]	Secondary metabolites biosynthesis, transport and catabolism	Retinal pigment epithelial membrane protein	9-cis-epoxycarotenoid dioxygenase NCED1, chloroplastic OS=Solanum lycopersicum OX=4081 GN=NCED1 PE=1 SV=2	Q	Secondary metabolites biosynthesis, transport and catabolism	9-cis-epoxycarotenoid dioxygenase [Actinidia chinensis var. chinensis]
gene-CEY00_Acc07188	784	880	994	2744	2052	2719	11.3736	12.9242	13.4604	36.2387	29.6801	29.7918	2.05e-32	1.3117	up	--	--	--	--	--	--	--	Phosphate-induced protein 1 conserved region	Protein EXORDIUM-like 5 OS=Arabidopsis thaliana OX=3702 GN=EXL5 PE=2 SV=1	S	Function unknown	Protein EXORDIUM-like [Actinidia chinensis var. chinensis]
gene-CEY00_Acc12056	65576	59652	61153	207279	157886	196046	1392.42	1282.27	1212.05	4004.9	3340.43	3142.49	1.76e-49	1.41796	up	[O]	Posttranslational modification, protein turnover, chaperones	Molecular Function: cysteine-type peptidase activity (GO:0008234);;	K16290|5.9e-94|nnu:104606845|K16290 xylem cysteine proteinase [EC:3.4.22.-] | (RefSeq) cysteine protease XCP1	--	[O]	Posttranslational modification, protein turnover, chaperones	Papain family cysteine protease	Actinidain OS=Actinidia deliciosa OX=3627 PE=1 SV=1	O	Posttranslational modification, protein turnover, chaperones	Actinidain like [Actinidia chinensis var. chinensis]
gene-CEY00_Acc05439	18	14	17	57	49	49	0.606094	0.477782	0.522576	1.75965	1.64702	1.26451	0.000202439	1.00848	up	[H]	Coenzyme transport and metabolism	Molecular Function: methyltransferase activity (GO:0008168);; Biological Process: methylation (GO:0032259);;	K22438|1.2e-16|qsu:111983315|K22438 trans-aconitate 3-methyltransferase [EC:2.1.1.145] | (RefSeq) trans-aconitate 3-methyltransferase-like	--	[R]	General function prediction only	Methyltransferase domain	--	Q	Secondary metabolites biosynthesis, transport and catabolism	Methyltransferase [Actinidia chinensis var. chinensis]
gene-CEY00_Acc05824	85	71	105	40	38	33	2.01832	1.70633	2.33562	0.861808	0.883236	0.584421	2.08e-05	-1.01889	down	--	--	--	--	--	--	--	Pollen protein Ole e 1 like	--	S	Function unknown	Pollen allergen Che a 1 like [Actinidia chinensis var. chinensis]
gene-CEY00_Acc05550	877	942	892	2044	1661	2439	16.5624	18.0209	15.7197	35.1496	31.2703	34.7885	2.74e-26	1.01115	up	--	--	Biological Process: lipid metabolic process (GO:0006629);; Molecular Function: phosphoric diester hydrolase activity (GO:0008081);;	K18696|5.9e-174|pavi:110764432|K18696 glycerophosphodiester phosphodiesterase [EC:3.1.4.46] | (RefSeq) glycerophosphodiester phosphodiesterase GDPD1, chloroplastic-like	Glycerophospholipid metabolism (ko00564)	[R]	General function prediction only	Glycerophosphoryl diester phosphodiesterase family	Glycerophosphodiester phosphodiesterase GDPD1, chloroplastic OS=Arabidopsis thaliana OX=3702 GN=GDPD1 PE=1 SV=1	C	Energy production and conversion	Glycerophosphodiester phosphodiesterase [Actinidia chinensis var. chinensis]
gene-CEY00_Acc09158	129	118	152	363	288	378	3.85403	3.59183	4.26838	9.92431	8.60773	8.56738	9.76e-14	1.13391	up	[Q]	Secondary metabolites biosynthesis, transport and catabolism	Molecular Function: metal ion binding (GO:0046872);; Molecular Function: dioxygenase activity (GO:0051213);;	K23947|2.1e-110|sind:105176872|K23947 2-oxoglutarate-dependent dioxygenase [EC:1.14.11.-] | (RefSeq) 2-oxoglutarate-dependent dioxygenase DAO	Tryptophan metabolism (ko00380)	[QR]	Secondary metabolites biosynthesis, transport and catabolism;; General function prediction only	2OG-Fe(II) oxygenase superfamily	2-oxoglutarate-dependent dioxygenase DAO OS=Oryza sativa subsp. indica OX=39946 GN=DAO PE=3 SV=1	Q	Secondary metabolites biosynthesis, transport and catabolism	2-oxoglutarate-dependent dioxygenase [Actinidia chinensis var. chinensis]
gene-CEY00_Acc10635	39	43	44	170	154	165	1.02646	1.14686	1.09214	4.1164	4.09264	3.31058	2.27e-14	1.52732	up	[M]	Cell wall/membrane/envelope biogenesis	Molecular Function: catalytic activity (GO:0003824);;	K13265|1.2e-101|adu:107472037|K13265 vestitone reductase [EC:1.1.1.348] | (RefSeq) vestitone reductase	Isoflavonoid biosynthesis (ko00943)	[V]	Defense mechanisms	NAD dependent epimerase/dehydratase family	Vestitone reductase OS=Medicago sativa OX=3879 PE=1 SV=1	V	Defense mechanisms	Vestitone reductase [Actinidia chinensis var. chinensis]
gene-CEY00_Acc27171	26	22	25	112	106	111	0.894994	0.765306	0.784668	3.53161	3.66934	2.90689	3.65e-12	1.57292	up	--	--	Molecular Function: protein phosphatase inhibitor activity (GO:0004864);; Biological Process: defense response (GO:0006952);; Biological Process: abscisic acid-activated signaling pathway (GO:0009738);; Molecular Function: abscisic acid binding (GO:0010427);; Molecular Function: signaling receptor activity (GO:0038023);;	--	--	--	--	Pathogenesis-related protein Bet v 1 family	Major allergen Pru ar 1 OS=Prunus armeniaca OX=36596 PE=1 SV=1	S	Function unknown	Major allergen Pru ar like [Actinidia chinensis var. chinensis]
gene-CEY00_Acc32106	20	30	21	125	102	79	0.477457	0.723809	0.457777	2.71178	2.43643	1.41899	1.28e-08	1.41235	up	--	--	Molecular Function: hydrolase activity, hydrolyzing O-glycosyl compounds (GO:0004553);; Biological Process: carbohydrate metabolic process (GO:0005975);;	K19891|5.1e-72|ath:AT2G01630|K19891 glucan endo-1,3-beta-glucosidase 1/2/3 [EC:3.2.1.39] | (RefSeq) O-Glycosyl hydrolases family 17 protein	Starch and sucrose metabolism (ko00500)	--	--	Glycosyl hydrolases family 17	Glucan endo-1,3-beta-glucosidase 14 OS=Arabidopsis thaliana OX=3702 GN=At2g27500 PE=2 SV=2	G	Carbohydrate transport and metabolism	Glucan endo-1,3-beta-glucosidase [Actinidia chinensis var. chinensis]
Actinidia_chinensis_newGene_1336	123	127	131	34	30	59	1.1073	1.23896	1.11723	0.297091	0.340212	0.496042	1.06e-11	-1.43535	down	--	--	Molecular Function: voltage-gated potassium channel activity (GO:0005249);; Cellular Component: integral component of membrane (GO:0016021);;	K05391|9.8e-140|nnu:104605334|K05391 cyclic nucleotide gated channel, plant | (RefSeq) probable cyclic nucleotide-gated ion channel 14	Plant-pathogen interaction (ko04626)	[PT]	Inorganic ion transport and metabolism;; Signal transduction mechanisms	--	Cyclic nucleotide-gated ion channel 17 OS=Arabidopsis thaliana OX=3702 GN=CNGC17 PE=1 SV=1	P	Inorganic ion transport and metabolism	Cyclic nucleotide-gated ion channel like [Actinidia chinensis var. chinensis]
gene-CEY00_Acc27134	107	113	97	1852	1283	1328	2.60522	2.78666	2.19486	41.2469	31.2837	24.5418	1.59e-98	3.30438	up	--	--	Molecular Function: hydrolase activity, hydrolyzing O-glycosyl compounds (GO:0004553);; Biological Process: carbohydrate metabolic process (GO:0005975);;	K19891|1.7e-50|ath:AT2G01630|K19891 glucan endo-1,3-beta-glucosidase 1/2/3 [EC:3.2.1.39] | (RefSeq) O-Glycosyl hydrolases family 17 protein	Starch and sucrose metabolism (ko00500)	--	--	Glycosyl hydrolases family 17	Lichenase OS=Nicotiana plumbaginifolia OX=4092 GN=GN1 PE=2 SV=3	G	Carbohydrate transport and metabolism	Lichenase like [Actinidia chinensis var. chinensis]
gene-CEY00_Acc08702	5	16	22	49	49	59	0.142976	0.555803	0.723553	1.5874	1.72782	1.59073	0.000223597	1.03441	up	--	--	Biological Process: response to acid chemical (GO:0001101);; Molecular Function: molecular_function (GO:0003674);; Molecular Function: enzyme inhibitor activity (GO:0004857);; Molecular Function: protein phosphatase inhibitor activity (GO:0004864);; Molecular Function: binding (GO:0005488);; Molecular Function: protein binding (GO:0005515);; Cellular Component: cellular_component (GO:0005575);; C…	K14496|3.2e-81|jcu:105648096|K14496 abscisic acid receptor PYR/PYL family | (RefSeq) abscisic acid receptor PYL4	MAPK signaling pathway - plant (ko04016);; Plant hormone signal transduction (ko04075)	--	--	Polyketide cyclase / dehydrase and lipid transport	Abscisic acid receptor PYL4 OS=Arabidopsis thaliana OX=3702 GN=PYL4 PE=1 SV=1	S	Function unknown	Abscisic acid receptor like [Actinidia chinensis var. chinensis]
gene-CEY00_Acc05460	65	56	59	214	132	224	1.78856	1.5638	1.53313	5.42164	3.65513	4.69606	6.16e-11	1.28629	up	--	--	Molecular Function: DNA binding (GO:0003677);; Cellular Component: nucleus (GO:0005634);; Biological Process: regulation of transcription, DNA-templated (GO:0006355);;	K00521|3.5e-41|cmos:111447866|K00521 ferric-chelate reductase [EC:1.16.1.7] | (RefSeq) ferric reduction oxidase 7, chloroplastic-like	--	--	--	No apical meristem (NAM) protein	NAC domain-containing protein 2 OS=Arabidopsis thaliana OX=3702 GN=NAC002 PE=1 SV=2	K	Transcription	NAC domain-containing protein [Actinidia chinensis var. chinensis]
gene-CEY00_Acc13351	9	24	20	68	56	71	0.171856	0.505137	0.375069	1.27208	1.14517	1.1141	1.34e-05	1.15397	up	--	--	Molecular Function: SNAP receptor activity (GO:0005484);; Biological Process: intracellular protein transport (GO:0006886);; Cellular Component: integral component of membrane (GO:0016021);; Biological Process: vesicle-mediated transport (GO:0016192);;	K08486|5.8e-121|rcu:8259763|K08486 syntaxin 1B/2/3 | (RefSeq) syntaxin-121	SNARE interactions in vesicular transport (ko04130)	[U]	Intracellular trafficking, secretion, and vesicular transport	Syntaxin	Syntaxin-121 OS=Arabidopsis thaliana OX=3702 GN=SYP121 PE=1 SV=1	U	Intracellular trafficking, secretion, and vesicular transport	Syntaxin-121 like [Actinidia chinensis var. chinensis]
gene-CEY00_Acc06512	24	44	50	209	181	237	0.614798	1.15474	1.19761	4.94159	4.6888	4.64302	6.56e-21	1.87694	up	[IR]	Lipid transport and metabolism;; General function prediction only	Molecular Function: hydrolase activity, acting on ester bonds (GO:0016788);;	K00679|6.0e-51|cic:CICLE_v10027727mg|K00679 phospholipid:diacylglycerol acyltransferase [EC:2.3.1.158] | (RefSeq) hypothetical protein	Glycerolipid metabolism (ko00561)	--	--	GDSL-like Lipase/Acylhydrolase	GDSL esterase/lipase At1g29670 OS=Arabidopsis thaliana OX=3702 GN=At1g29670 PE=2 SV=1	L	Replication, recombination and repair	GDSL esterase/lipase [Actinidia chinensis var. chinensis]
gene-CEY00_Acc03826	10	13	13	64	53	53	0.25009	0.33636	0.310432	1.51118	1.37691	1.03935	4.83e-07	1.33556	up	[J]	Translation, ribosomal structure and biogenesis	Molecular Function: RNA binding (GO:0003723);;	K12741|2.8e-18|smo:SELMODRAFT_163608|K12741 heterogeneous nuclear ribonucleoprotein A1/A3 | (RefSeq) hypothetical protein	Spliceosome (ko03040)	[R]	General function prediction only	RNA recognition motif. (a.k.a. RRM, RBD, or RNP domain)	Probable RNA-binding protein ARP1 OS=Arabidopsis thaliana OX=3702 GN=ARP1 PE=2 SV=1	A	RNA processing and modification	RNA-binding protein ARP1 [Actinidia chinensis var. chinensis]
gene-CEY00_Acc31852	72	83	76	349	194	248	1.10832	1.29697	1.09552	4.95183	3.01456	2.91642	5.04e-12	1.38184	up	--	--	Molecular Function: transcription factor activity, sequence-specific DNA binding (GO:0003700);; Cellular Component: nucleus (GO:0005634);; Molecular Function: sequence-specific DNA binding (GO:0043565);;	K13424|5.5e-200|vvi:100243352|K13424 WRKY transcription factor 33 | (RefSeq) WRKY transcription factor WRKY24	MAPK signaling pathway - plant (ko04016);; Plant-pathogen interaction (ko04626)	--	--	WRKY DNA -binding domain	WRKY transcription factor WRKY24 OS=Oryza sativa subsp. indica OX=39946 GN=WRKY24 PE=2 SV=1	K	Transcription	WRKY transcription factor [Actinidia chinensis var. chinensis]
gene-CEY00_Acc22935	82	69	69	537	510	547	1.53619	1.29423	1.20449	9.17344	9.53761	7.7582	2.05e-60	2.47469	up	[QV]	Secondary metabolites biosynthesis, transport and catabolism;; Defense mechanisms	Molecular Function: monooxygenase activity (GO:0004497);; Molecular Function: iron ion binding (GO:0005506);; Cellular Component: integral component of membrane (GO:0016021);; Molecular Function: oxidoreductase activity, acting on paired donors, with incorporation or reduction of molecular oxygen (GO:0016705);; Molecular Function: heme binding (GO:0020037);;	K20667|6.7e-244|oeu:111374953|K20667 beta-amyrin 28-monooxygenase [EC:1.14.14.126] | (RefSeq) beta-amyrin 28-oxidase-like	--	[QI]	Secondary metabolites biosynthesis, transport and catabolism;; Lipid transport and metabolism	Cytochrome P450	Beta-amyrin 28-monooxygenase OS=Panax ginseng OX=4054 GN=CYP716A52v2 PE=1 SV=1	Q	Secondary metabolites biosynthesis, transport and catabolism	Beta-amyrin 28-oxidase [Actinidia chinensis var. chinensis]
gene-CEY00_Acc20314	225	335	279	134	116	109	1.35839	2.04736	1.57435	0.73287	0.69474	0.493785	6.61e-10	-1.15246	down	--	--	Biological Process: double-strand break repair via homologous recombination (GO:0000724);; Biological Process: recombinational repair (GO:0000725);; Biological Process: nucleobase-containing compound metabolic process (GO:0006139);; Biological Process: DNA metabolic process (GO:0006259);; Biological Process: DNA repair (GO:0006281);; Biological Process: double-strand break repair (GO:0006302);; B…	K23113|0.0e+00|qsu:112034621|K23113 structural maintenance of chromosomes flexible hinge domain-containing protein 1 | (RefSeq) uncharacterized protein LOC112034621	--	--	--	Histidine kinase-, DNA gyrase B-, and HSP90-like ATPase	Structural maintenance of chromosomes flexible hinge domain-containing protein GMI1 OS=Arabidopsis thaliana OX=3702 GN=GMI1 PE=2 SV=1	S	Function unknown	Protein DEFECTIVE IN MERISTEM SILENCING like [Actinidia chinensis var. chinensis]
gene-CEY00_Acc02912	19	18	14	61	67	56	0.9532	0.930176	0.671001	2.84831	3.39922	2.15509	1.2e-05	1.15562	up	--	--	Biological Process: fatty acid biosynthetic process (GO:0006633);; Cellular Component: membrane (GO:0016020);; Molecular Function: transferase activity, transferring acyl groups other than amino-acyl groups (GO:0016747);;	K15397|6.5e-45|jre:109003016|K15397 3-ketoacyl-CoA synthase [EC:2.3.1.199] | (RefSeq) 3-ketoacyl-CoA synthase 19-like	Fatty acid elongation (ko00062);; Plant-pathogen interaction (ko04626)	--	--	3-Oxoacyl-[acyl-carrier-protein (ACP)] synthase III C terminal	3-ketoacyl-CoA synthase 19 OS=Arabidopsis thaliana OX=3702 GN=KCS19 PE=2 SV=1	I	Lipid transport and metabolism	3-ketoacyl-CoA synthase [Actinidia chinensis var. chinensis]
gene-CEY00_Acc04856	74	69	88	221	155	189	1.8204	1.702	2.01644	4.96175	3.81218	3.51361	2.61e-07	1.00261	up	--	--	Molecular Function: RNA polymerase II regulatory region sequence-specific DNA binding (GO:0000977);; Molecular Function: transcription factor activity, sequence-specific DNA binding (GO:0003700);; Cellular Component: nucleus (GO:0005634);; Biological Process: positive regulation of transcription from RNA polymerase II promoter (GO:0045944);; Molecular Function: protein dimerization activity (GO:0…	K09264|2.7e-33|smo:SELMODRAFT_450937|K09264 MADS-box transcription factor, plant | (RefSeq) MADS6-2; MADS-domain transcription factor	--	[K]	Transcription	SRF-type transcription factor (DNA-binding and dimerisation domain)	MADS-box protein AGL24 OS=Arabidopsis thaliana OX=3702 GN=AGL24 PE=1 SV=1	K	Transcription	SVP2 [Actinidia chinensis]
gene-CEY00_Acc01302	62	43	55	252	179	194	2.85565	1.99075	2.34983	10.6218	8.26849	6.76419	3.02e-14	1.5332	up	[Q]	Secondary metabolites biosynthesis, transport and catabolism	--	K24028|6.4e-68|vvi:100254096|K24028 salicylic acid 3-hydroxylase [EC:1.14.11.-] | (RefSeq) protein DOWNY MILDEW RESISTANCE 6	--	[QR]	Secondary metabolites biosynthesis, transport and catabolism;; General function prediction only	non-haem dioxygenase in morphine synthesis N-terminal	Protein DOWNY MILDEW RESISTANCE 6 OS=Arabidopsis thaliana OX=3702 GN=DMR6 PE=1 SV=1	Q	Secondary metabolites biosynthesis, transport and catabolism	Protein DOWNY MILDEW RESISTANCE like [Actinidia chinensis var. chinensis]
gene-CEY00_Acc00944	42	31	38	90	95	147	2.14292	1.57511	1.80368	4.17488	4.87108	5.67469	5.56e-07	1.13348	up	--	--	--	--	--	--	--	Domain of unknown function (DUF4228)	--	S	Function unknown	Protein of unknown function DUF4228, plant protein [Actinidia chinensis var. chinensis]
gene-CEY00_Acc19908	24	38	17	127	129	176	0.418675	0.683192	0.272625	2.06601	2.29392	2.36425	3.69e-15	1.7659	up	[G]	Carbohydrate transport and metabolism	Molecular Function: trehalose-phosphatase activity (GO:0004805);; Biological Process: trehalose biosynthetic process (GO:0005992);;	K01087|2.2e-159|dzi:111289683|K01087 trehalose 6-phosphate phosphatase [EC:3.1.3.12] | (RefSeq) probable trehalose-phosphate phosphatase F isoform X1	Starch and sucrose metabolism (ko00500)	[G]	Carbohydrate transport and metabolism	Trehalose-phosphatase	Probable trehalose-phosphate phosphatase F OS=Arabidopsis thaliana OX=3702 GN=TPPF PE=2 SV=1	G	Carbohydrate transport and metabolism	Trehalose-phosphate phosphatase [Actinidia chinensis var. chinensis]
gene-CEY00_Acc28194	51	56	35	227	143	203	1.02915	1.15304	0.653211	4.23031	2.90222	3.134	2.12e-13	1.52974	up	[QV]	Secondary metabolites biosynthesis, transport and catabolism;; Defense mechanisms	Molecular Function: monooxygenase activity (GO:0004497);; Molecular Function: iron ion binding (GO:0005506);; Molecular Function: oxidoreductase activity, acting on paired donors, with incorporation or reduction of molecular oxygen (GO:0016705);; Molecular Function: heme binding (GO:0020037);;	K20667|3.7e-218|qsu:111984350|K20667 beta-amyrin 28-monooxygenase [EC:1.14.14.126] | (RefSeq) beta-amyrin 28-oxidase-like	--	[QI]	Secondary metabolites biosynthesis, transport and catabolism;; Lipid transport and metabolism	Cytochrome P450	Beta-amyrin 28-monooxygenase OS=Vitis vinifera OX=29760 GN=CYP716A17 PE=1 SV=2	Q	Secondary metabolites biosynthesis, transport and catabolism	Beta-amyrin 28-oxidase [Actinidia chinensis var. chinensis]
gene-CEY00_Acc27159	10	0	6	46	53	40	0.408418	0	0.237923	1.81025	2.28772	1.30597	3.93e-07	1.40503	up	--	--	Molecular Function: protein phosphatase inhibitor activity (GO:0004864);; Biological Process: defense response (GO:0006952);; Biological Process: abscisic acid-activated signaling pathway (GO:0009738);; Molecular Function: abscisic acid binding (GO:0010427);; Molecular Function: signaling receptor activity (GO:0038023);;	K05387|8.4e-10|peq:110030824|K05387 glutamate receptor, ionotropic, plant | (RefSeq) LOW QUALITY PROTEIN: glutamate receptor 2.3-like	--	--	--	Pathogenesis-related protein Bet v 1 family	Major allergen Pru ar 1 OS=Prunus armeniaca OX=36596 PE=1 SV=1	S	Function unknown	Major allergen Pru ar like [Actinidia chinensis var. chinensis]
gene-CEY00_Acc30460	44	36	33	98	89	124	0.597823	0.492864	0.426112	1.22535	1.21743	1.2933	2.81e-06	1.05464	up	[S]	Function unknown	--	K12486|3.2e-15|han:110942573|K12486 stromal membrane-associated protein | (RefSeq) probable ADP-ribosylation factor GTPase-activating protein AGD5	Endocytosis (ko04144)	--	--	--	IQ domain-containing protein IQM2 OS=Arabidopsis thaliana OX=3702 GN=IQM2 PE=2 SV=1	S	Function unknown	IQ domain-containing protein [Actinidia chinensis var. chinensis]
gene-CEY00_Acc03919	302	396	397	103	166	245	18.6985	24.8399	22.9809	5.81895	10.2458	11.4748	6.28e-08	-1.05253	down	--	--	--	K03860|1.0e-41|nnu:104608881|K03860 phosphatidylinositol N-acetylglucosaminyltransferase subunit Q | (RefSeq) N-acetylglucosaminyl-phosphatidylinositol biosynthetic protein gpi1-like	Glycosylphosphatidylinositol (GPI)-anchor biosynthesis (ko00563)	--	--	Gibberellin regulated protein	Protein GAST1 OS=Solanum lycopersicum OX=4081 GN=GAST1 PE=2 SV=1	S	Function unknown	hypothetical protein CEY00_Acc03919 [Actinidia chinensis var. chinensis]
gene-CEY00_Acc20424	372	395	446	1046	803	967	7.44905	7.99764	8.34236	19.0626	16.0265	14.6286	1.76e-16	1.03323	up	[M]	Cell wall/membrane/envelope biogenesis	Molecular Function: catalytic activity (GO:0003824);;	K09753|2.9e-41|sbi:8077848|K09753 cinnamoyl-CoA reductase [EC:1.2.1.44] | (RefSeq) cinnamoyl-CoA reductase 1	Phenylpropanoid biosynthesis (ko00940)	[V]	Defense mechanisms	NAD dependent epimerase/dehydratase family	--	V	Defense mechanisms	Cinnamoyl-CoA reductase-like [Actinidia chinensis var. chinensis]
gene-CEY00_Acc01225	0	0	3	41	35	48	0	0	0.030868	0.6067	0.562728	0.582423	7.33e-12	1.8493	up	--	--	Biological Process: cell tip growth (GO:0009932);; Molecular Function: hydrolase activity (GO:0016787);; Biological Process: phosphatidylinositol dephosphorylation (GO:0046856);; Biological Process: root hair initiation (GO:0048766);;	K24221|1.9e-88|lsv:111907353|K24221 type I inositol polyphosphate 5-phosphatase IP5P1/2 [EC:3.1.3.56] | (RefSeq) type I inositol polyphosphate 5-phosphatase 2-like isoform X1	Inositol phosphate metabolism (ko00562)	[U]	Intracellular trafficking, secretion, and vesicular transport	Endonuclease/Exonuclease/phosphatase family	Type I inositol polyphosphate 5-phosphatase 5 OS=Arabidopsis thaliana OX=3702 GN=IP5P5 PE=2 SV=1	T	Signal transduction mechanisms	Type I inositol polyphosphate 5-phosphatase [Actinidia chinensis var. chinensis]
gene-CEY00_Acc04762	672	656	669	284	244	316	6.68688	6.60526	6.21314	2.57139	2.42123	2.37188	1.16e-30	-1.30043	down	[T]	Signal transduction mechanisms	Molecular Function: protein serine/threonine kinase activity (GO:0004674);; Molecular Function: ATP binding (GO:0005524);; Cellular Component: integral component of membrane (GO:0016021);;	K20181|1.2e-80|mtr:MTR_5g026090|K20181 vacuolar protein sorting-associated protein 18 | (RefSeq) vacuolar sorting-associated-like protein	--	--	--	Leucine rich repeat	Putative receptor-like protein kinase At3g47110 OS=Arabidopsis thaliana OX=3702 GN=At3g47110 PE=3 SV=1	T	Signal transduction mechanisms	Receptor-like protein kinase [Actinidia chinensis var. chinensis]
gene-CEY00_Acc24608	24	39	39	108	105	149	0.387241	0.633173	0.583738	1.60758	1.71585	1.8422	2.1e-09	1.33185	up	[E]	Amino acid transport and metabolism	Cellular Component: integral component of membrane (GO:0016021);; Molecular Function: transmembrane transporter activity (GO:0022857);;	K03294|1.3e-132|atr:18427195|K03294 basic amino acid/polyamine antiporter, APA family | (RefSeq) cationic amino acid transporter 1 isoform X1	--	[E]	Amino acid transport and metabolism	Amino acid permease	Cationic amino acid transporter 6, chloroplastic OS=Arabidopsis thaliana OX=3702 GN=CAT6 PE=2 SV=1	E	Amino acid transport and metabolism	Cationic amino acid transporter 6 like [Actinidia chinensis var. chinensis]
gene-CEY00_Acc25755	0	2	2	58	61	59	0	0.036586	0.029395	0.962344	1.09532	0.802773	1.78e-17	2.24853	up	[QV]	Secondary metabolites biosynthesis, transport and catabolism;; Defense mechanisms	Molecular Function: monooxygenase activity (GO:0004497);; Molecular Function: iron ion binding (GO:0005506);; Cellular Component: integral component of membrane (GO:0016021);; Molecular Function: oxidoreductase activity, acting on paired donors, with incorporation or reduction of molecular oxygen (GO:0016705);; Molecular Function: heme binding (GO:0020037);;	K20666|9.7e-164|dzi:111309893|K20666 gibberellin 13-oxidase [EC:1.14.-.-] | (RefSeq) cytochrome P450 714B2-like	--	[QI]	Secondary metabolites biosynthesis, transport and catabolism;; Lipid transport and metabolism	Cytochrome P450	Cytochrome P450 714C2 OS=Oryza sativa subsp. japonica OX=39947 GN=CYP714C2 PE=2 SV=1	Q	Secondary metabolites biosynthesis, transport and catabolism	Cytochrome P450 714C2 like [Actinidia chinensis var. chinensis]
gene-CEY00_Acc15612	279	324	305	687	680	1015	6.09352	7.16597	6.22452	13.695	14.8406	16.7806	4.85e-21	1.17882	up	--	--	Molecular Function: DNA binding (GO:0003677);; Molecular Function: transcription factor activity, sequence-specific DNA binding (GO:0003700);; Cellular Component: nucleus (GO:0005634);;	K13434|4.3e-35|mdm:103447258|K13434 pathogenesis-related genes transcriptional activator PTI6 | (RefSeq) pathogenesis-related genes transcriptional activator PTI6-like	Plant-pathogen interaction (ko04626)	--	--	AP2 domain	Ethylene-responsive transcription factor CRF2 OS=Arabidopsis thaliana OX=3702 GN=CRF2 PE=1 SV=1	K	Transcription	Ethylene-responsive transcription factor [Actinidia chinensis var. chinensis]
gene-CEY00_Acc13210	173	156	148	464	331	383	5.90696	5.36624	4.71107	14.4065	11.2417	9.87016	7.09e-11	1.0672	up	[T]	Signal transduction mechanisms	Biological Process: phosphorelay signal transduction system (GO:0000160);;	K14492|1.2e-75|tcc:18598779|K14492 two-component response regulator ARR-A family | (RefSeq) two-component response regulator ARR9	Plant hormone signal transduction (ko04075)	[K]	Transcription	Response regulator receiver domain	Two-component response regulator ARR9 OS=Arabidopsis thaliana OX=3702 GN=ARR9 PE=1 SV=1	K	Transcription	Two-component response regulator like [Actinidia chinensis var. chinensis]
gene-CEY00_Acc19546	32	46	43	222	121	154	1.15391	1.66875	1.43726	7.30501	4.32894	4.18665	3.96e-11	1.48565	up	--	--	Biological Process: megagametogenesis (GO:0009561);;	--	--	--	--	Probable lipid transfer	--	S	Function unknown	hypothetical protein CEY00_Acc19546 [Actinidia chinensis var. chinensis]
gene-CEY00_Acc09299	81	73	83	27	36	19	4.68039	4.27036	4.47605	1.41621	2.02082	0.801915	4.95e-06	-1.15223	down	--	--	Molecular Function: transferase activity, transferring acyl groups (GO:0016746);;	--	--	--	--	--	--	--	--	Glycerol-3-phosphate acyltransferase [Actinidia chinensis var. chinensis]
gene-CEY00_Acc22501	26614	22858	22827	13522	10658	13387	562.884	489.415	450.632	260.215	224.594	213.738	4.37e-25	-1.02655	down	--	--	--	K03097|7.3e-12|aip:107623262|K03097 casein kinase II subunit alpha [EC:2.7.11.1] | (RefSeq) casein kinase II subunit alpha-like isoform X2	Ribosome biogenesis in eukaryotes (ko03008);; Circadian rhythm - plant (ko04712)	--	--	Protein of unknown function (DUF642)	Allergen Act d 3 (Fragments) OS=Actinidia deliciosa OX=3627 PE=1 SV=3	S	Function unknown	Allergen Act d like [Actinidia chinensis var. chinensis]
gene-CEY00_Acc18278	333	291	327	130	117	137	5.72301	5.07048	5.24357	2.03649	1.99561	1.77636	1.31e-18	-1.30606	down	--	--	Molecular Function: DNA binding (GO:0003677);; Cellular Component: nucleus (GO:0005634);; Biological Process: regulation of transcription, DNA-templated (GO:0006355);;	K16222|5.4e-60|csat:104726841|K16222 Dof zinc finger protein DOF5.5 | (RefSeq) cyclic dof factor 1-like	Circadian rhythm - plant (ko04712)	--	--	Dof domain, zinc finger	Cyclic dof factor 3 OS=Arabidopsis thaliana OX=3702 GN=CDF3 PE=1 SV=2	K	Transcription	Cyclic dof factor like [Actinidia chinensis var. chinensis]
gene-CEY00_Acc08218	274	264	258	139	97	84	5.86072	5.70799	5.13752	2.69075	2.05649	1.35254	2.78e-10	-1.21003	down	[G]	Carbohydrate transport and metabolism	Molecular Function: pectate lyase activity (GO:0030570);; Biological Process: pectin catabolic process (GO:0045490);; Molecular Function: metal ion binding (GO:0046872);;	K01728|2.3e-213|vvi:100242302|K01728 pectate lyase [EC:4.2.2.2] | (RefSeq) probable pectate lyase 5	Pentose and glucuronate interconversions (ko00040)	--	--	Pectate lyase	Probable pectate lyase 5 OS=Arabidopsis thaliana OX=3702 GN=At1g67750 PE=2 SV=2	G	Carbohydrate transport and metabolism	Pectate lyase [Actinidia chinensis var. chinensis]
gene-CEY00_Acc02041	783	763	641	230	192	314	12.1589	11.9901	9.28674	3.23866	2.95934	3.67574	4.26e-33	-1.5917	down	[E]	Amino acid transport and metabolism	Cellular Component: integral component of membrane (GO:0016021);; Molecular Function: transmembrane transporter activity (GO:0022857);;	K14638|6.1e-218|pvu:PHAVU_001G163400g|K14638 solute carrier family 15 (peptide/histidine transporter), member 3/4 | (RefSeq) hypothetical protein	--	[E]	Amino acid transport and metabolism	POT family	Protein NRT1/ PTR FAMILY 5.2 OS=Arabidopsis thaliana OX=3702 GN=NPF5.2 PE=2 SV=1	E	Amino acid transport and metabolism	Protein NRT1/ PTR FAMILY 5.2 like [Actinidia chinensis var. chinensis]
gene-CEY00_Acc33364	110	115	131	71	27	35	3.3553	3.56036	3.73511	1.96691	0.809287	0.80935	4.73e-06	-1.12643	down	[I]	Lipid transport and metabolism	Molecular Function: hydrolase activity (GO:0016787);;	K13258|7.9e-100|lang:109331604|K13258 2-hydroxyisoflavanone dehydratase [EC:4.2.1.105] | (RefSeq) 2-hydroxyisoflavanone dehydratase-like	Isoflavonoid biosynthesis (ko00943)	[V]	Defense mechanisms	alpha/beta hydrolase fold	2-hydroxyisoflavanone dehydratase OS=Glycyrrhiza echinata OX=46348 GN=HIDM PE=1 SV=1	V	Defense mechanisms	2-hydroxyisoflavanone dehydratase [Actinidia chinensis var. chinensis]
gene-CEY00_Acc02171	100	82	60	32	26	42	1.65957	1.36726	0.929255	0.479968	0.427319	0.51653	2.4e-05	-1.04334	down	[P]	Inorganic ion transport and metabolism	Molecular Function: copper ion binding (GO:0005507);; Biological Process: lignin catabolic process (GO:0046274);; Cellular Component: apoplast (GO:0048046);; Molecular Function: hydroquinone:oxygen oxidoreductase activity (GO:0052716);;	K05909|1.7e-289|vvi:100251850|K05909 laccase [EC:1.10.3.2] | (RefSeq) laccase-17	--	[Q]	Secondary metabolites biosynthesis, transport and catabolism	Multicopper oxidase	Laccase-17 OS=Arabidopsis thaliana OX=3702 GN=LAC17 PE=2 SV=1	Q	Secondary metabolites biosynthesis, transport and catabolism	Laccase-17 like [Actinidia chinensis var. chinensis]
gene-CEY00_Acc29722	40	43	40	132	106	103	1.41073	1.52872	1.31495	4.224	3.70775	2.73118	2.4e-06	1.07231	up	--	--	--	--	--	--	--	Late embryogenesis abundant protein	Late embryogenesis abundant protein Lea5 OS=Citrus sinensis OX=2711 GN=LEA5 PE=2 SV=1	S	Function unknown	Late embryogenesis abundant protein like [Actinidia chinensis var. chinensis]
gene-CEY00_Acc18962	4	4	0	102	102	144	0.082851	0.077653	0	1.9334	2.1284	2.26466	7.93e-33	2.94169	up	[E]	Amino acid transport and metabolism	Biological Process: cellular amino acid metabolic process (GO:0006520);; Molecular Function: transaminase activity (GO:0008483);; Biological Process: biosynthetic process (GO:0009058);; Molecular Function: pyridoxal phosphate binding (GO:0030170);;	K00815|1.3e-195|oeu:111395464|K00815 tyrosine aminotransferase [EC:2.6.1.5] | (RefSeq) tyrosine aminotransferase-like	Ubiquinone and other terpenoid-quinone biosynthesis (ko00130);; Cysteine and methionine metabolism (ko00270);; Tyrosine metabolism (ko00350);; Phenylalanine metabolism (ko00360);; Phenylalanine, tyrosine and tryptophan biosynthesis (ko00400);; Isoquinoline alkaloid biosynthesis (ko00950);; Tropane, piperidine and pyridine alkaloid biosynthesis (ko00960)	[E]	Amino acid transport and metabolism	Aminotransferase class I and II	Nicotianamine aminotransferase 1 OS=Oryza sativa subsp. japonica OX=39947 GN=NAAT1 PE=1 SV=1	E	Amino acid transport and metabolism	Tyrosine aminotransferase [Actinidia chinensis var. chinensis]
Actinidia_chinensis_newGene_6030	91	114	80	30	38	56	1.51796	1.8895	1.16481	0.532087	0.575769	0.610294	1.44e-05	-1.02832	down	--	--	--	--	--	[S]	Function unknown	--	Protein SWEETIE OS=Arabidopsis thaliana OX=3702 GN=SWEETIE PE=1 SV=2	P	Inorganic ion transport and metabolism	HEAT repeat-containing protein isoform 1 [Actinidia chinensis var. chinensis]
gene-CEY00_Acc26692	31181	28872	33327	15668	14639	19711	521.349	488.698	520.127	238.361	243.876	248.789	1.45e-43	-1.00736	down	--	--	Cellular Component: photosystem I (GO:0009522);; Cellular Component: photosystem II (GO:0009523);; Cellular Component: chloroplast thylakoid membrane (GO:0009535);; Biological Process: photosynthesis, light harvesting (GO:0009765);; Cellular Component: integral component of membrane (GO:0016021);; Molecular Function: chlorophyll binding (GO:0016168);; Biological Process: protein-chromophore linka…	K08910|1.7e-126|csv:101222701|K08910 light-harvesting complex I chlorophyll a/b binding protein 4 | (RefSeq) chlorophyll a-b binding protein P4, chloroplastic	Photosynthesis - antenna proteins (ko00196)	--	--	Chlorophyll A-B binding protein	Chlorophyll a-b binding protein 4, chloroplastic OS=Arabidopsis thaliana OX=3702 GN=LHCA4 PE=1 SV=1	C	Energy production and conversion	Chlorophyll a-b binding protein [Actinidia chinensis var. chinensis]
gene-CEY00_Acc01510	84	95	108	259	237	318	2.58575	2.96183	3.10963	7.24848	7.26214	7.38993	2.25e-14	1.23624	up	--	--	--	--	--	--	--	--	--	--	--	GDSL esterase/lipase [Actinidia chinensis var. chinensis]
gene-CEY00_Acc26220	113	125	105	49	49	61	1.97543	2.20565	1.711	0.76941	0.842654	0.79787	1.36e-06	-1.01955	down	[C]	Energy production and conversion	Biological Process: carotenoid biosynthetic process (GO:0016117);; Molecular Function: oxidoreductase activity, acting on paired donors, with incorporation or reduction of molecular oxygen (GO:0016705);;	K14593|1.7e-234|hbr:110663117|K14593 capsanthin/capsorubin synthase [EC:5.3.99.8] | (RefSeq) capsanthin/capsorubin synthase, chromoplastic-like	Carotenoid biosynthesis (ko00906)	--	--	Lycopene cyclase protein	Capsanthin/capsorubin synthase, chromoplastic OS=Citrus sinensis OX=2711 GN=CCS PE=3 SV=1	S	Function unknown	Capsanthin/capsorubin synthase [Actinidia chinensis var. chinensis]
gene-CEY00_Acc25057	26	32	33	88	72	97	0.234182	0.292916	0.272706	0.723799	0.642047	0.659381	1.02e-05	1.04733	up	[T]	Signal transduction mechanisms	Molecular Function: protein kinase activity (GO:0004672);; Molecular Function: ATP binding (GO:0005524);; Cellular Component: integral component of membrane (GO:0016021);; Molecular Function: carbohydrate binding (GO:0030246);; Biological Process: recognition of pollen (GO:0048544);;	K24104|1.8e-74|thj:104799061|K24104 GPN-loop GTPase | (RefSeq) LOW QUALITY PROTEIN: uncharacterized protein LOC104799061	--	--	--	D-mannose binding lectin	G-type lectin S-receptor-like serine/threonine-protein kinase At4g27290 OS=Arabidopsis thaliana OX=3702 GN=At4g27290 PE=3 SV=4	T	Signal transduction mechanisms	G-type lectin S-receptor-like serine/threonine-protein kinase [Actinidia chinensis var. chinensis]
gene-CEY00_Acc13467	405	374	418	186	165	215	13.0503	12.205	12.5626	5.43217	5.29035	5.23672	1.58e-17	-1.1258	down	--	--	Cellular Component: nucleus (GO:0005634);; Biological Process: regulation of transcription, DNA-templated (GO:0006355);; Biological Process: auxin-activated signaling pathway (GO:0009734);;	K14484|1.4e-93|han:110900225|K14484 auxin-responsive protein IAA | (RefSeq) auxin-responsive protein IAA14-like	Plant hormone signal transduction (ko04075)	--	--	AUX/IAA family	Auxin-responsive protein IAA7 OS=Arabidopsis thaliana OX=3702 GN=IAA7 PE=1 SV=1	K	Transcription	Auxin-responsive protein [Actinidia chinensis var. chinensis]
gene-CEY00_Acc12098	2519	2487	2510	7056	4606	6163	38.582	38.5557	35.8793	98.345	70.2929	71.2651	3.93e-19	1.06364	up	--	--	Molecular Function: ATP binding (GO:0005524);; Cellular Component: nucleus (GO:0005634);; Biological Process: transcription, DNA-templated (GO:0006351);; Biological Process: regulation of transcription, DNA-templated (GO:0006355);; Biological Process: developmental process (GO:0032502);;	K22382|4.0e-11|oeu:111408549|K22382 WD repeat-containing protein 26 | (RefSeq) WD repeat-containing protein 26 homolog	--	--	--	WRC	Growth-regulating factor 6 OS=Oryza sativa subsp. japonica OX=39947 GN=GRF6 PE=2 SV=2	K	Transcription	Growth-regulating factor like [Actinidia chinensis var. chinensis]
gene-CEY00_Acc05745	19	18	41	146	75	113	0.524414	0.509233	1.09201	3.79587	2.12014	2.42528	5.48e-08	1.3704	up	--	--	Molecular Function: DNA binding (GO:0003677);; Cellular Component: nucleus (GO:0005634);;	K09422|7.7e-113|vvi:100257755|K09422 transcription factor MYB, plant | (RefSeq) myb-related protein 306	--	[K]	Transcription	Myb-like DNA-binding domain	Myb-related protein 306 OS=Antirrhinum majus OX=4151 GN=MYB306 PE=2 SV=1	--	--	Myb-related protein [Actinidia chinensis var. chinensis]
gene-CEY00_Acc01459	486	454	480	210	147	215	19.3562	18.2975	17.8241	7.58093	5.81382	6.44178	2.1e-23	-1.33892	down	--	--	Molecular Function: enzyme inhibitor activity (GO:0004857);;	K01051|8.7e-17|jre:109013060|K01051 pectinesterase [EC:3.1.1.11] | (RefSeq) pectinesterase-like	Pentose and glucuronate interconversions (ko00040)	--	--	Plant invertase/pectin methylesterase inhibitor	21 kDa protein OS=Daucus carota OX=4039 PE=2 SV=1	S	Function unknown	Pectinesterase inhibitor domain protein [Actinidia chinensis var. chinensis]
gene-CEY00_Acc11746	1766	1775	1767	316	509	683	79.309	80.6914	74.0893	12.9184	22.7588	23.1412	1.05e-30	-1.76575	down	--	--	--	--	--	--	--	--	--	--	--	Ran-binding protein like [Actinidia chinensis var. chinensis]
gene-CEY00_Acc18546	48	41	48	100	99	177	0.438196	0.378971	0.403157	0.830409	0.893276	1.21677	2.43e-06	1.04822	up	--	--	Cellular Component: integral component of membrane (GO:0016021);; Molecular Function: kinase activity (GO:0016301);;	K17550|6.0e-51|qsu:111989606|K17550 protein phosphatase 1 regulatory subunit 7 | (RefSeq) probable LRR receptor-like serine/threonine-protein kinase At2g24230	--	[R]	General function prediction only	Leucine rich repeat	Receptor-like protein 9b OS=Arabidopsis thaliana OX=3702 GN=RLP9B PE=3 SV=1	A	RNA processing and modification	LRR receptor-like serine/threonine-protein kinase [Actinidia chinensis var. chinensis]
gene-CEY00_Acc12686	347	236	339	684	727	928	6.12682	4.21754	5.60173	11.0156	12.8175	12.3978	3.39e-16	1.13032	up	--	--	Cellular Component: nucleus (GO:0005634);; Biological Process: regulation of transcription, DNA-templated (GO:0006355);; Biological Process: auxin-activated signaling pathway (GO:0009734);;	K14484|1.6e-95|vvi:100266914|K14484 auxin-responsive protein IAA | (RefSeq) auxin-responsive protein IAA18	Plant hormone signal transduction (ko04075)	--	--	AUX/IAA family	Auxin-responsive protein IAA26 OS=Arabidopsis thaliana OX=3702 GN=IAA26 PE=1 SV=2	K	Transcription	Auxin-responsive protein [Actinidia chinensis var. chinensis]
gene-CEY00_Acc11578	381	550	634	2593	1320	1800	11.6714	17.0307	18.1127	72.2624	40.2853	41.6218	8.58e-06	1.17227	up	--	--	--	--	--	--	--	Extensin-like region	--	--	--	Extensin like [Actinidia chinensis var. chinensis]
gene-CEY00_Acc24294	737	689	700	290	255	368	9.43144	8.93514	8.35978	3.37055	3.25381	3.55587	3.27e-30	-1.28486	down	[T]	Signal transduction mechanisms	Cellular Component: integral component of membrane (GO:0016021);; Molecular Function: oxidoreductase activity (GO:0016491);;	K00521|2.1e-300|vvi:100263818|K00521 ferric-chelate reductase [EC:1.16.1.7] | (RefSeq) ferric reduction oxidase 7, chloroplastic	--	[PQ]	Inorganic ion transport and metabolism;; Secondary metabolites biosynthesis, transport and catabolism	FAD-binding domain	Ferric reduction oxidase 6 OS=Arabidopsis thaliana OX=3702 GN=FRO6 PE=2 SV=1	--	--	Ferric reduction oxidase [Actinidia chinensis var. chinensis]
gene-CEY00_Acc08187	37	34	47	171	86	137	0.655514	0.620894	0.796888	2.81876	1.54915	1.87192	9.85e-08	1.23672	up	[V]	Defense mechanisms	Molecular Function: antiporter activity (GO:0015297);; Cellular Component: integral component of membrane (GO:0016021);; Molecular Function: xenobiotic transporter activity (GO:0042910);;	K03327|2.1e-184|vvi:100261384|K03327 multidrug resistance protein, MATE family | (RefSeq) protein DETOXIFICATION 29	--	[R]	General function prediction only	MatE	Protein DETOXIFICATION 29 OS=Arabidopsis thaliana OX=3702 GN=DTX29 PE=1 SV=1	V	Defense mechanisms	Protein DETOXIFICATION like [Actinidia chinensis var. chinensis]
gene-CEY00_Acc13622	409	387	349	195	182	204	13.6066	13.0313	10.8411	5.90043	6.01669	5.11777	1.96e-12	-1.01355	down	[Q]	Secondary metabolites biosynthesis, transport and catabolism	Molecular Function: metal ion binding (GO:0046872);; Molecular Function: dioxygenase activity (GO:0051213);;	K23947|4.8e-110|sind:105176872|K23947 2-oxoglutarate-dependent dioxygenase [EC:1.14.11.-] | (RefSeq) 2-oxoglutarate-dependent dioxygenase DAO	Tryptophan metabolism (ko00380)	[QR]	Secondary metabolites biosynthesis, transport and catabolism;; General function prediction only	2OG-Fe(II) oxygenase superfamily	2-oxoglutarate-dependent dioxygenase DAO OS=Oryza sativa subsp. indica OX=39946 GN=DAO PE=3 SV=1	Q	Secondary metabolites biosynthesis, transport and catabolism	2-oxoglutarate-dependent dioxygenase [Actinidia chinensis var. chinensis]
gene-CEY00_Acc30065	1017	993	1050	510	390	590	18.885	18.6727	18.2012	8.61989	7.20824	8.27287	1.02e-26	-1.1213	down	[Q]	Secondary metabolites biosynthesis, transport and catabolism	Biological Process: lipid metabolic process (GO:0006629);; Molecular Function: fatty-acyl-CoA reductase (alcohol-forming) activity (GO:0080019);;	K13356|5.4e-212|nta:107770654|K13356 alcohol-forming fatty acyl-CoA reductase [EC:1.2.1.84] | (RefSeq) alcohol-forming fatty acyl-CoA reductase-like	Cutin, suberine and wax biosynthesis (ko00073);; Peroxisome (ko04146)	[I]	Lipid transport and metabolism	Male sterility protein	Fatty acyl-CoA reductase 3 OS=Arabidopsis thaliana OX=3702 GN=FAR3 PE=1 SV=1	I	Lipid transport and metabolism	Fatty acyl-CoA reductase [Actinidia chinensis var. chinensis]
gene-CEY00_Acc32068	329	277	331	836	790	1033	6.7187	5.73112	6.31451	15.5508	16.0916	15.9438	1.23e-32	1.31412	up	[S]	Function unknown	Biological Process: malate transport (GO:0015743);; Cellular Component: integral component of membrane (GO:0016021);;	K03695|1.6e-32|egr:104416563|K03695 ATP-dependent Clp protease ATP-binding subunit ClpB | (RefSeq) chaperone protein ClpB1-like	--	[R]	General function prediction only	Aluminium activated malate transporter	Aluminum-activated malate transporter 2 OS=Arabidopsis thaliana OX=3702 GN=ALMT2 PE=2 SV=2	S	Function unknown	Aluminum-activated malate transporter like [Actinidia chinensis var. chinensis]
gene-CEY00_Acc10081	42	46	41	163	117	129	0.840116	0.924766	0.76815	2.97267	2.34884	1.96254	1.01e-08	1.24349	up	--	--	Molecular Function: transferase activity, transferring acyl groups other than amino-acyl groups (GO:0016747);;	K13065|1.2e-167|nnu:104603248|K13065 shikimate O-hydroxycinnamoyltransferase [EC:2.3.1.133] | (RefSeq) shikimate O-hydroxycinnamoyltransferase-like	Phenylpropanoid biosynthesis (ko00940);; Flavonoid biosynthesis (ko00941);; Stilbenoid, diarylheptanoid and gingerol biosynthesis (ko00945)	--	--	Transferase family	Shikimate O-hydroxycinnamoyltransferase OS=Nicotiana tabacum OX=4097 GN=HST PE=1 SV=1	S	Function unknown	Shikimate O-hydroxycinnamoyltransferase [Actinidia chinensis var. chinensis]
gene-CEY00_Acc06220	91	100	113	345	294	426	2.34738	2.60738	2.72218	8.0965	7.5663	8.28997	5.1e-24	1.52482	up	[M]	Cell wall/membrane/envelope biogenesis	Biological Process: galactose metabolic process (GO:0006012);; Molecular Function: inositol 3-alpha-galactosyltransferase activity (GO:0047216);;	K18819|1.7e-169|pop:7473221|K18819 inositol 3-alpha-galactosyltransferase [EC:2.4.1.123] | (RefSeq) galactinol synthase 1	Galactose metabolism (ko00052)	[G]	Carbohydrate transport and metabolism	Glycosyl transferase family 8	Galactinol synthase 1 OS=Ajuga reptans OX=38596 GN=GOLS1 PE=1 SV=1	G	Carbohydrate transport and metabolism	Galactinol synthase [Actinidia chinensis var. chinensis]
gene-CEY00_Acc05801	27	33	40	99	87	98	0.580761	0.703259	0.796675	1.94087	1.84705	1.59078	4.45e-06	1.0725	up	--	--	Molecular Function: transferase activity, transferring acyl groups other than amino-acyl groups (GO:0016747);;	K13264|6.3e-106|lja:Lj2g3v1090790.1|K13264 isoflavone 7-O-glucoside-6''-O-malonyltransferase [EC:2.3.1.115] | (RefSeq) Lj2g3v1090790.1; -	Isoflavonoid biosynthesis (ko00943);; Flavone and flavonol biosynthesis (ko00944)	--	--	Transferase family	Phenolic glucoside malonyltransferase 1 OS=Arabidopsis thaliana OX=3702 GN=PMAT1 PE=1 SV=1	S	Function unknown	Phenolic glucoside malonyltransferase [Actinidia chinensis var. chinensis]
gene-CEY00_Acc33222	0	0	0	88	76	85	0	0	0	1.00991	0.952546	0.806935	2.12e-28	2.84727	up	[P]	Inorganic ion transport and metabolism	Molecular Function: NADPH-hemoprotein reductase activity (GO:0003958);; Cellular Component: endoplasmic reticulum membrane (GO:0005789);; Molecular Function: FMN binding (GO:0010181);; Cellular Component: integral component of membrane (GO:0016021);; Molecular Function: flavin adenine dinucleotide binding (GO:0050660);; Molecular Function: NADP binding (GO:0050661);;	K00327|0.0e+00|vvi:100240979|K00327 NADPH-ferrihemoprotein reductase [EC:1.6.2.4] | (RefSeq) NADPH--cytochrome P450 reductase	--	[C]	Energy production and conversion	FAD binding domain	NADPH--cytochrome P450 reductase OS=Catharanthus roseus OX=4058 GN=CPR PE=2 SV=1	C	Energy production and conversion	NADPH--cytochrome P450 reductase [Actinidia chinensis var. chinensis]
gene-CEY00_Acc17732	1894	1790	1806	4585	4350	5473	46.2422	44.2588	41.1623	101.905	105.849	100.905	1.78e-56	1.23763	up	[R]	General function prediction only	Molecular Function: acid phosphatase activity (GO:0003993);;	K20728|2.5e-57|thj:104814965|K20728 vegetative storage protein 2 | (RefSeq) vegetative storage protein 2-like	MAPK signaling pathway - plant (ko04016)	--	--	HAD superfamily, subfamily IIIB (Acid phosphatase)	Acid phosphatase 1 OS=Solanum lycopersicum OX=4081 GN=APS1 PE=2 SV=1	S	Function unknown	Acid phosphatase [Actinidia chinensis var. chinensis]
gene-CEY00_Acc27132	60	64	51	159	171	141	1.52628	1.62843	1.19389	3.67397	4.31741	2.69038	3.88e-07	1.08295	up	--	--	Molecular Function: hydrolase activity, hydrolyzing O-glycosyl compounds (GO:0004553);; Biological Process: carbohydrate metabolic process (GO:0005975);;	K19891|2.3e-54|ath:AT2G01630|K19891 glucan endo-1,3-beta-glucosidase 1/2/3 [EC:3.2.1.39] | (RefSeq) O-Glycosyl hydrolases family 17 protein	Starch and sucrose metabolism (ko00500)	--	--	Glycosyl hydrolases family 17	Lichenase OS=Nicotiana plumbaginifolia OX=4092 GN=GN1 PE=2 SV=3	G	Carbohydrate transport and metabolism	Lichenase like [Actinidia chinensis var. chinensis]
gene-CEY00_Acc10282	101	150	173	482	333	440	2.2224	3.34592	3.57434	9.70402	7.33949	7.36098	5.45e-13	1.26809	up	--	--	Molecular Function: peroxidase activity (GO:0004601);; Cellular Component: extracellular region (GO:0005576);; Biological Process: response to oxidative stress (GO:0006979);; Molecular Function: heme binding (GO:0020037);; Biological Process: hydrogen peroxide catabolic process (GO:0042744);; Molecular Function: metal ion binding (GO:0046872);;	K00430|1.5e-154|nnu:104611642|K00430 peroxidase [EC:1.11.1.7] | (RefSeq) peroxidase 51-like	Phenylpropanoid biosynthesis (ko00940)	--	--	Peroxidase	Peroxidase 73 OS=Arabidopsis thaliana OX=3702 GN=PER73 PE=1 SV=1	Q	Secondary metabolites biosynthesis, transport and catabolism	Peroxidase [Actinidia chinensis var. chinensis]
gene-CEY00_Acc32082	62	58	88	137	210	181	2.78681	2.67769	3.72399	5.66005	9.52688	6.22488	4.45e-06	1.00612	up	--	--	--	K13206|4.5e-20|ghi:107902778|K13206 coiled-coil domain-containing protein 55 | (RefSeq) LOW QUALITY PROTEIN: nuclear speckle splicing regulatory protein 1	--	--	--	--	Protein GL2-INTERACTING REPRESSOR 1 OS=Arabidopsis thaliana OX=3702 GN=GIR1 PE=1 SV=1	--	--	InaD-like protein [Actinidia chinensis var. chinensis]
gene-CEY00_Acc05715	291	293	314	823	605	757	4.57371	4.67229	4.61065	11.7953	9.49847	9.00381	6.19e-17	1.08867	up	[MDT]	Cell wall/membrane/envelope biogenesis;; Cell cycle control, cell division, chromosome partitioning;; Signal transduction mechanisms	Molecular Function: ATP binding (GO:0005524);;	K08900|6.2e-174|dzi:111299600|K08900 mitochondrial chaperone BCS1 | (RefSeq) AAA-ATPase ASD, mitochondrial-like	--	[O]	Posttranslational modification, protein turnover, chaperones	Domain associated at C-terminal with AAA	AAA-ATPase ASD, mitochondrial OS=Arabidopsis thaliana OX=3702 GN=AATP1 PE=1 SV=1	O	Posttranslational modification, protein turnover, chaperones	AAA-ATPase [Actinidia chinensis var. chinensis]
gene-CEY00_Acc31630	85	111	120	38	36	61	2.10415	2.78396	2.77404	0.845681	0.888998	1.12754	1.51e-06	-1.08225	down	--	--	Cellular Component: integral component of membrane (GO:0016021);; Molecular Function: hydrolase activity, acting on ester bonds (GO:0016788);;	K01206|2.0e-76|eus:EUTSA_v10018726mg|K01206 alpha-L-fucosidase [EC:3.2.1.51] | (RefSeq) hypothetical protein	Other glycan degradation (ko00511)	--	--	GDSL-like Lipase/Acylhydrolase	GDSL esterase/lipase At1g54790 OS=Arabidopsis thaliana OX=3702 GN=At1g54790 PE=2 SV=1	S	Function unknown	GDSL esterase/lipase [Actinidia chinensis var. chinensis]
gene-CEY00_Acc17107	2827	2879	2713	9523	8794	11253	45.4879	46.8899	40.7444	139.443	140.994	136.704	9.02e-103	1.64752	up	[G]	Carbohydrate transport and metabolism	Molecular Function: hydrolase activity, hydrolyzing O-glycosyl compounds (GO:0004553);; Biological Process: carbohydrate metabolic process (GO:0005975);;	K22279|1.5e-193|pop:18094968|K22279 vicianin beta-glucosidase [EC:3.2.1.119] | (RefSeq) vicianin hydrolase	--	[G]	Carbohydrate transport and metabolism	Glycosyl hydrolase family 1	Beta-glucosidase 12 OS=Oryza sativa subsp. indica OX=39946 GN=BGLU12 PE=3 SV=1	G	Carbohydrate transport and metabolism	Beta-glucosidase [Actinidia chinensis var. chinensis]
gene-CEY00_Acc04624	2210	2393	2816	6253	4885	6190	60.6016	66.4176	72.0848	156.023	133.476	128.148	4.74e-24	1.05861	up	[R]	General function prediction only	Cellular Component: cellular_component (GO:0005575);; Cellular Component: cell (GO:0005623);; Cellular Component: plasma membrane (GO:0005886);; Biological Process: response to stress (GO:0006950);; Biological Process: response to oxidative stress (GO:0006979);; Biological Process: biological_process (GO:0008150);; Biological Process: response to inorganic substance (GO:0010035);; Biological Proc…	K23050|8.0e-151|oeu:111385164|K23050 phenylcoumaran benzylic ether reductase [EC:1.3.1.-] | (RefSeq) isoflavone reductase-like protein	--	--	--	NmrA-like family	Isoflavone reductase-like protein OS=Olea europaea OX=4146 PE=1 SV=1	S	Function unknown	Isoflavone reductase-like protein [Actinidia chinensis var. chinensis]
gene-CEY00_Acc23101	607	562	584	313	253	339	14.4425	13.5388	12.965	6.76979	5.99958	6.08043	6.71e-18	-1.023	down	[C]	Energy production and conversion	Molecular Function: hydrolase activity (GO:0016787);;	K01097|1.4e-13|atr:18432282|K01097 N-acylneuraminate-9-phosphatase [EC:3.1.3.29] | (RefSeq) N-acylneuraminate-9-phosphatase isoform X1	Amino sugar and nucleotide sugar metabolism (ko00520)	[R]	General function prediction only	Haloacid dehalogenase-like hydrolase	--	S	Function unknown	Haloacid dehalogenase-like hydrolase domain-containing protein [Actinidia chinensis var. chinensis]
gene-CEY00_Acc07952	14	25	18	111	48	48	0.712786	1.3016	0.85249	5.27306	2.47435	1.86753	0.000202704	1.04061	up	--	--	Cellular Component: integral component of membrane (GO:0016021);;	--	--	--	--	--	--	--	--	CGMP-specific 3',5'-cyclic phosphodiesterase [Actinidia chinensis var. chinensis]
gene-CEY00_Acc00690	33	30	34	152	137	150	1.61078	1.45584	1.55265	6.80675	6.70989	5.57676	1.13e-15	1.66666	up	[G]	Carbohydrate transport and metabolism	Biological Process: carbohydrate metabolic process (GO:0005975);; Molecular Function: chitin binding (GO:0008061);;	K01183|2.2e-52|oeu:111399636|K01183 chitinase [EC:3.2.1.14] | (RefSeq) chitotriosidase-1-like	Amino sugar and nucleotide sugar metabolism (ko00520)	[G]	Carbohydrate transport and metabolism	Glycosyl hydrolases family 18	Class V chitinase OS=Arabidopsis thaliana OX=3702 GN=ChiC PE=1 SV=1	G	Carbohydrate transport and metabolism	Endochitinase [Actinidia chinensis var. chinensis]
gene-CEY00_Acc31751	79	82	92	299	175	249	1.74751	1.84348	1.91467	6.06008	3.88735	4.19672	4.98e-10	1.1891	up	[Q]	Secondary metabolites biosynthesis, transport and catabolism	Molecular Function: oxidoreductase activity (GO:0016491);; Molecular Function: metal ion binding (GO:0046872);;	K13229|1.1e-73|sita:101778204|K13229 2,4-dihydroxy-1,4-benzoxazin-3-one-glucoside dioxygenase [EC:1.14.11.59] | (RefSeq) DIBOA-glucoside dioxygenase BX6	Benzoxazinoid biosynthesis (ko00402)	[QR]	Secondary metabolites biosynthesis, transport and catabolism;; General function prediction only	2OG-Fe(II) oxygenase superfamily	1-aminocyclopropane-1-carboxylate oxidase homolog 1 OS=Arabidopsis thaliana OX=3702 GN=At1g06620 PE=2 SV=1	Q	Secondary metabolites biosynthesis, transport and catabolism	1-aminocyclopropane-1-carboxylate oxidase [Actinidia chinensis var. chinensis]
gene-CEY00_Acc32632	12	16	15	71	74	69	0.212775	0.281004	0.247849	1.16067	1.31675	0.936872	5.62e-09	1.47979	up	--	--	Molecular Function: magnesium ion binding (GO:0000287);; Molecular Function: terpene synthase activity (GO:0010333);;	K18108|2.0e-173|vvi:100232956|K18108 (-)-alpha-terpineol synthase [EC:4.2.3.111] | (RefSeq) (-)-a-terpineol synthase	Monoterpenoid biosynthesis (ko00902)	--	--	Terpene synthase family, metal binding domain	(-)-alpha-terpineol synthase OS=Vitis vinifera OX=29760 PE=1 SV=1	S	Function unknown	(-)-alpha-terpineol synthase [Actinidia chinensis var. chinensis]
gene-CEY00_Acc01623	702	660	801	2004	1608	2041	20.4768	19.4753	21.8028	53.2064	46.7623	44.9608	3.5e-32	1.21429	up	--	--	Cellular Component: mitochondrial matrix (GO:0005759);;	K15414|8.7e-94|oeu:111405479|K15414 complement component 1 Q subcomponent-binding protein, mitochondrial | (RefSeq) uncharacterized protein At2g39795, mitochondrial-like	--	[C]	Energy production and conversion	Mitochondrial glycoprotein	Uncharacterized protein At2g39795, mitochondrial OS=Arabidopsis thaliana OX=3702 GN=At2g39795 PE=1 SV=1	C	Energy production and conversion	Mitochondrial glycoprotein [Actinidia chinensis var. chinensis]
gene-CEY00_Acc31055	48	40	40	154	101	115	1.99145	1.70359	1.54428	5.89094	4.22672	3.6551	9.34e-07	1.11334	up	--	--	Molecular Function: calcium ion binding (GO:0005509);;	K13448|8.2e-60|mesc:110628605|K13448 calcium-binding protein CML | (RefSeq) probable calcium-binding protein CML41	Plant-pathogen interaction (ko04626)	[T]	Signal transduction mechanisms	EF hand	Probable calcium-binding protein CML41 OS=Arabidopsis thaliana OX=3702 GN=CML41 PE=2 SV=2	T	Signal transduction mechanisms	Calcium-binding protein [Actinidia chinensis var. chinensis]
gene-CEY00_Acc17408	423	447	498	226	173	239	8.14943	8.71307	8.9636	3.9577	3.3166	3.47773	9.81e-18	-1.1435	down	--	--	--	--	--	--	--	Protein of unknown function, DUF594	--	S	Function unknown	Chitinase-like protein [Actinidia chinensis var. chinensis]
gene-CEY00_Acc08558	33	35	19	96	80	82	0.434952	0.476005	0.237954	1.16654	1.06217	0.832633	2.6e-05	1.05379	up	[T]	Signal transduction mechanisms	Molecular Function: ATP binding (GO:0005524);; Cellular Component: integral component of membrane (GO:0016021);; Molecular Function: ATPase activity (GO:0016887);;	K05681|1.4e-91|mtr:MTR_3g096410|K05681 ATP-binding cassette, subfamily G (WHITE), member 2 | (RefSeq) white-brown-complex ABC transporter family protein	ABC transporters (ko02010)	[Q]	Secondary metabolites biosynthesis, transport and catabolism	ABC-2 type transporter	ABC transporter G family member 20 OS=Arabidopsis thaliana OX=3702 GN=ABCG20 PE=2 SV=1	Q	Secondary metabolites biosynthesis, transport and catabolism	ABC transporter G family member 20 like [Actinidia chinensis var. chinensis]
gene-CEY00_Acc08118	281	287	324	653	645	894	7.09093	7.31699	7.62521	14.9989	16.204	17.0259	6.03e-21	1.10551	up	[Q]	Secondary metabolites biosynthesis, transport and catabolism	Molecular Function: oxidoreductase activity (GO:0016491);;	K19642|4.0e-139|jre:108996990|K19642 D-galacturonate reductase [EC:1.1.1.365] | (RefSeq) D-galacturonate reductase-like	Ascorbate and aldarate metabolism (ko00053)	[R]	General function prediction only	Aldo/keto reductase family	D-galacturonate reductase OS=Fragaria ananassa OX=3747 GN=GALUR PE=1 SV=1	S	Function unknown	D-galacturonate reductase [Actinidia chinensis var. chinensis]
gene-CEY00_Acc24009	24	26	26	97	63	81	0.903055	0.980744	0.904648	3.36231	2.3895	2.32997	5.45e-06	1.1251	up	--	--	Cellular Component: integral component of membrane (GO:0016021);; Molecular Function: transferase activity (GO:0016740);;	K22706|3.9e-86|pmum:103319663|K22706 (R)-mandelonitrile beta-glucosyltransferase [EC:2.4.1.354] | (RefSeq) 7-deoxyloganetin glucosyltransferase-like	Cyanoamino acid metabolism (ko00460)	[GC]	Carbohydrate transport and metabolism;; Energy production and conversion	--	7-deoxyloganetin glucosyltransferase OS=Gardenia jasminoides OX=114476 GN=UGT85A24 PE=1 SV=1	--	--	7-deoxyloganetin glucosyltransferase, partial [Actinidia chinensis var. chinensis]
gene-CEY00_Acc30867	102	84	62	24	20	24	1.95498	1.61972	1.1074	0.416706	0.372586	0.337696	6.82e-09	-1.4213	down	[I]	Lipid transport and metabolism	Biological Process: phospholipid metabolic process (GO:0006644);; Molecular Function: phosphatidate phosphatase activity (GO:0008195);; Cellular Component: integral component of membrane (GO:0016021);;	K18693|2.8e-145|pper:18782849|K18693 diacylglycerol diphosphate phosphatase / phosphatidate phosphatase [EC:3.1.3.81 3.1.3.4] | (RefSeq) lipid phosphate phosphatase 2 isoform X2	Glycerolipid metabolism (ko00561);; Glycerophospholipid metabolism (ko00564)	[I]	Lipid transport and metabolism	PAP2 superfamily	Putative lipid phosphate phosphatase 3, chloroplastic OS=Arabidopsis thaliana OX=3702 GN=LPP3 PE=2 SV=1	I	Lipid transport and metabolism	Lipid phosphate phosphatase, partial [Actinidia chinensis var. chinensis]
gene-CEY00_Acc30776	247	232	260	102	80	110	6.02944	5.73601	5.9329	2.26918	1.93555	2.0138	2.64e-16	-1.31652	down	--	--	Biological Process: signal transduction (GO:0007165);;	--	--	--	--	Putative nuclear localisation signal	Ninja-family protein AFP2 OS=Arabidopsis thaliana OX=3702 GN=AFP2 PE=1 SV=1	S	Function unknown	Ninja-family protein [Actinidia chinensis var. chinensis]
gene-CEY00_Acc12813	505	466	509	1440	1110	1337	9.1005	8.50239	8.56892	23.6403	19.9647	18.217	7.93e-26	1.21056	up	[QV]	Secondary metabolites biosynthesis, transport and catabolism;; Defense mechanisms	Molecular Function: monooxygenase activity (GO:0004497);; Molecular Function: iron ion binding (GO:0005506);; Cellular Component: integral component of membrane (GO:0016021);; Molecular Function: oxidoreductase activity, acting on paired donors, with incorporation or reduction of molecular oxygen (GO:0016705);; Molecular Function: heme binding (GO:0020037);;	K20623|2.3e-245|vvi:100263428|K20623 typhasterol/6-deoxotyphasterol 2alpha-hydroxylase | (RefSeq) cytochrome P450 71A1	Brassinosteroid biosynthesis (ko00905)	[Q]	Secondary metabolites biosynthesis, transport and catabolism	Cytochrome P450	Trimethyltridecatetraene synthase OS=Zea mays OX=4577 GN=CYP92C6 PE=1 SV=1	Q	Secondary metabolites biosynthesis, transport and catabolism	Flavonoid 3'-monooxygenase [Actinidia chinensis var. chinensis]
Actinidia_chinensis_newGene_3033	97	94	132	457	399	435	12.2729	11.3979	15.4772	50.2942	48.0512	39.7753	3.51e-27	1.69681	up	--	--	Molecular Function: protein phosphatase inhibitor activity (GO:0004864);; Biological Process: defense response (GO:0006952);; Biological Process: abscisic acid-activated signaling pathway (GO:0009738);; Molecular Function: abscisic acid binding (GO:0010427);; Molecular Function: signaling receptor activity (GO:0038023);;	--	--	--	--	Pathogenesis-related protein Bet v 1 family	Major strawberry allergen Fra a 1-B OS=Fragaria ananassa OX=3747 GN=FRAA1B.1 PE=3 SV=1	S	Function unknown	Major allergen Pru ar like [Actinidia chinensis var. chinensis]
gene-CEY00_Acc21222	38	54	52	194	103	106	2.43905	3.51379	3.07978	11.3767	6.60212	5.15573	3.41e-05	1.02245	up	--	--	--	--	--	--	--	--	--	--	--	Beta-defensin 107A like [Actinidia chinensis var. chinensis]
gene-CEY00_Acc21328	24361	23302	26667	10352	11539	15012	730.352	707.231	746.252	282.39	344.676	339.753	3.4e-32	-1.10032	down	--	--	Cellular Component: photosystem I (GO:0009522);; Cellular Component: photosystem II (GO:0009523);; Cellular Component: chloroplast thylakoid membrane (GO:0009535);; Biological Process: photosynthesis, light harvesting (GO:0009765);; Cellular Component: integral component of membrane (GO:0016021);; Molecular Function: chlorophyll binding (GO:0016168);; Biological Process: protein-chromophore linka…	K08912|4.4e-144|qsu:112030611|K08912 light-harvesting complex II chlorophyll a/b binding protein 1 | (RefSeq) chlorophyll a-b binding protein of LHCII type 1-like	Photosynthesis - antenna proteins (ko00196)	--	--	Chlorophyll A-B binding protein	Chlorophyll a-b binding protein 40, chloroplastic OS=Nicotiana tabacum OX=4097 GN=CAB40 PE=2 SV=1	C	Energy production and conversion	Chlorophyll a-b binding protein 40precursor [Actinidia chinensis var. chinensis]
gene-CEY00_Acc18196	1101	960	1070	2447	2434	3052	34.5074	30.4528	31.3149	69.8052	76.0353	72.2328	3.05e-40	1.1805	up	[J]	Translation, ribosomal structure and biogenesis	Molecular Function: RNA binding (GO:0003723);; Molecular Function: structural constituent of ribosome (GO:0003735);; Biological Process: translation (GO:0006412);; Cellular Component: small ribosomal subunit (GO:0015935);;	K02989|4.7e-96|mcha:111024592|K02989 small subunit ribosomal protein S5e | (RefSeq) 40S ribosomal protein S5-like	Ribosome (ko03010)	[J]	Translation, ribosomal structure and biogenesis	Ribosomal protein S7p/S5e	40S ribosomal protein S5-1 OS=Arabidopsis thaliana OX=3702 GN=RPS5A PE=1 SV=1	J	Translation, ribosomal structure and biogenesis	40S ribosomal protein like [Actinidia chinensis var. chinensis]
gene-CEY00_Acc30686	103	105	107	629	466	540	2.87173	2.9614	2.77538	15.9552	12.9399	11.3588	4.8e-41	2.04207	up	[MDT]	Cell wall/membrane/envelope biogenesis;; Cell cycle control, cell division, chromosome partitioning;; Signal transduction mechanisms	Molecular Function: ATP binding (GO:0005524);; Cellular Component: integral component of membrane (GO:0016021);;	K08900|2.0e-131|mesc:110601980|K08900 mitochondrial chaperone BCS1 | (RefSeq) AAA-ATPase ASD, mitochondrial-like	--	[O]	Posttranslational modification, protein turnover, chaperones	Domain associated at C-terminal with AAA	AAA-ATPase ASD, mitochondrial OS=Arabidopsis thaliana OX=3702 GN=AATP1 PE=1 SV=1	O	Posttranslational modification, protein turnover, chaperones	AAA-ATPase, partial [Actinidia chinensis var. chinensis]
gene-CEY00_Acc31137	29	33	18	105	107	148	1.38135	1.56813	0.765725	4.55573	5.11224	5.33873	8.63e-12	1.55197	up	--	--	Molecular Function: DNA binding (GO:0003677);; Cellular Component: nucleus (GO:0005634);; Cellular Component: cytoplasm (GO:0005737);; Biological Process: leaf proximal/distal pattern formation (GO:0010589);; Biological Process: positive regulation of transcription, DNA-templated (GO:0045893);;	--	--	--	--	KNOX2 domain	Protein KNATM OS=Arabidopsis thaliana OX=3702 GN=KNATM PE=1 SV=1	K	Transcription	Homeobox protein knotted-1-like [Actinidia chinensis var. chinensis]
gene-CEY00_Acc07928	35	29	36	152	134	124	0.745218	0.607131	0.712591	2.94284	2.82828	1.98182	4.2e-12	1.51842	up	[IR]	Lipid transport and metabolism;; General function prediction only	Molecular Function: hydrolase activity, acting on ester bonds (GO:0016788);;	K00679|8.2e-45|cic:CICLE_v10027727mg|K00679 phospholipid:diacylglycerol acyltransferase [EC:2.3.1.158] | (RefSeq) hypothetical protein	Glycerolipid metabolism (ko00561)	--	--	GDSL-like Lipase/Acylhydrolase	GDSL esterase/lipase At5g37690 OS=Arabidopsis thaliana OX=3702 GN=At5g37690 PE=2 SV=1	I	Lipid transport and metabolism	GDSL esterase/lipase [Actinidia chinensis var. chinensis]
gene-CEY00_Acc31721	143	128	160	34	48	82	1.99295	1.81321	2.0884	0.430869	0.66111	0.859962	1.02e-08	-1.23817	down	[P]	Inorganic ion transport and metabolism	Molecular Function: secondary active sulfate transmembrane transporter activity (GO:0008271);; Cellular Component: chloroplast (GO:0009507);; Cellular Component: integral component of membrane (GO:0016021);;	K17471|0.0e+00|hbr:110664928|K17471 sulfate transporter 3 | (RefSeq) sulfate transporter 3.1-like	--	[P]	Inorganic ion transport and metabolism	Sulfate permease family	Sulfate transporter 3.1 OS=Arabidopsis thaliana OX=3702 GN=SULTR3;1 PE=2 SV=1	P	Inorganic ion transport and metabolism	Sulfate transporter 3.1 like [Actinidia chinensis var. chinensis]
gene-CEY00_Acc03355	151	166	156	57	43	84	3.1706	3.53426	3.04956	1.0778	0.8903	1.32116	8.68e-11	-1.27104	down	--	--	Molecular Function: hydrolase activity, hydrolyzing O-glycosyl compounds (GO:0004553);; Biological Process: carbohydrate metabolic process (GO:0005975);;	--	--	[G]	Carbohydrate transport and metabolism	--	--	G	Carbohydrate transport and metabolism	Poly(A) RNA polymerase, partial [Actinidia chinensis var. chinensis]
gene-CEY00_Acc27163	0	5	5	58	31	39	0	0.174239	0.187416	2.18701	1.28437	1.24094	3.03e-08	1.52164	up	--	--	Molecular Function: protein phosphatase inhibitor activity (GO:0004864);; Biological Process: defense response (GO:0006952);; Biological Process: abscisic acid-activated signaling pathway (GO:0009738);; Molecular Function: abscisic acid binding (GO:0010427);; Molecular Function: signaling receptor activity (GO:0038023);;	K05387|4.6e-08|peq:110030824|K05387 glutamate receptor, ionotropic, plant | (RefSeq) LOW QUALITY PROTEIN: glutamate receptor 2.3-like	--	--	--	Pathogenesis-related protein Bet v 1 family	Major allergen Pru ar 1 OS=Prunus armeniaca OX=36596 PE=1 SV=1	S	Function unknown	Major allergen Pru ar like [Actinidia chinensis var. chinensis]
gene-CEY00_Acc14803	32	48	59	191	167	195	0.509024	0.777427	0.88625	2.80554	2.67403	2.37613	1.72e-14	1.54812	up	[DPM]	Cell cycle control, cell division, chromosome partitioning;; Inorganic ion transport and metabolism;; Cell wall/membrane/envelope biogenesis	Molecular Function: copper ion binding (GO:0005507);; Biological Process: lignin catabolic process (GO:0046274);; Cellular Component: apoplast (GO:0048046);; Molecular Function: hydroquinone:oxygen oxidoreductase activity (GO:0052716);;	K05909|9.7e-282|oeu:111381417|K05909 laccase [EC:1.10.3.2] | (RefSeq) laccase-3-like	--	[Q]	Secondary metabolites biosynthesis, transport and catabolism	Multicopper oxidase	Laccase-3 OS=Arabidopsis thaliana OX=3702 GN=LAC3 PE=2 SV=2	Z	Cytoskeleton	Laccase-3 like [Actinidia chinensis var. chinensis]
gene-CEY00_Acc17663	857	860	986	459	399	502	25.9563	26.3773	27.8976	12.6493	12.0498	11.4868	1.6e-23	-1.0655	down	--	--	Cellular Component: cell wall (GO:0005618);; Molecular Function: manganese ion binding (GO:0030145);; Molecular Function: nutrient reservoir activity (GO:0045735);; Cellular Component: apoplast (GO:0048046);;	--	--	--	--	Cupin	Auxin-binding protein ABP19a OS=Prunus persica OX=3760 GN=ABP19A PE=3 SV=1	S	Function unknown	Auxin-binding protein like [Actinidia chinensis var. chinensis]
gene-CEY00_Acc28854	128	113	122	1548	1093	1373	4.88506	4.36789	4.33953	53.7824	41.6079	39.5775	2.22e-114	3.08491	up	--	--	--	K12173|2.9e-19|gmx:100794341|K12173 BRCA1-A complex subunit BRE | (RefSeq) BRISC and BRCA1-A complex member 2	Homologous recombination (ko03440)	--	--	Thaumatin family	Thaumatin-like protein OS=Actinidia chinensis var. chinensis OX=1590841 GN=TLP PE=1 SV=2	S	Function unknown	RecName: Full=Thaumatin-like protein; AltName: Allergen=Act c 2; Flags: Precursor [Actinidia chinensis var. chinensis]
gene-CEY00_Acc18373	213	215	221	82	78	72	6.09432	6.23597	5.91444	2.13864	2.22305	1.55037	3.23e-15	-1.39419	down	--	--	Molecular Function: sulfotransferase activity (GO:0008146);;	K22312|5.0e-105|gab:108485901|K22312 hydroxyjasmonate sulfotransferase [EC:2.8.2.39] | (RefSeq) flavonol sulfotransferase-like	--	[R]	General function prediction only	Sulfotransferase domain	Cytosolic sulfotransferase 18 OS=Arabidopsis thaliana OX=3702 GN=SOT18 PE=1 SV=1	H	Coenzyme transport and metabolism	Cytosolic sulfotransferase [Actinidia chinensis var. chinensis]
gene-CEY00_Acc32405	640	885	890	2470	1538	1943	12.3043	17.2421	15.9912	43.2535	29.4876	28.2361	4.26e-12	1.07563	up	--	--	--	--	--	--	--	Domain of unknown function (DUF702)	Protein LATERAL ROOT PRIMORDIUM 1 OS=Arabidopsis thaliana OX=3702 GN=LRP1 PE=1 SV=1	S	Function unknown	Protein LATERAL ROOT PRIMORDIUM like [Actinidia chinensis var. chinensis]
gene-CEY00_Acc11788	578	499	643	307	190	345	10.4625	9.14092	10.8595	5.05879	3.41793	4.71316	3.56e-13	-1.07177	down	--	--	Molecular Function: transcription factor activity, sequence-specific DNA binding (GO:0003700);; Biological Process: positive regulation of transcription, DNA-templated (GO:0045893);;	K14432|6.8e-155|vvi:100232889|K14432 ABA responsive element binding factor | (RefSeq) GRIP55; ripening-related bZIP protein-like	Plant hormone signal transduction (ko04075)	--	--	bZIP transcription factor	ABSCISIC ACID-INSENSITIVE 5-like protein 5 OS=Arabidopsis thaliana OX=3702 GN=ABF2 PE=1 SV=1	K	Transcription	ABSCISIC ACID-INSENSITIVE 5-like protein [Actinidia chinensis var. chinensis]
gene-CEY00_Acc09154	72	57	44	30	5	22	1.49527	1.1905	0.843205	0.567221	0.104107	0.343494	0.000316247	-1.01743	down	--	--	Molecular Function: UDP-glycosyltransferase activity (GO:0008194);;	K18823|2.0e-83|adu:107468558|K18823 soyasaponin III rhamnosyltransferase [EC:2.4.1.273] | (RefSeq) soyasaponin III rhamnosyltransferase	--	[GC]	Carbohydrate transport and metabolism;; Energy production and conversion	UDP-glucoronosyl and UDP-glucosyl transferase	Putative UDP-rhamnose:rhamnosyltransferase 1 OS=Fragaria ananassa OX=3747 GN=GT4 PE=2 SV=1	--	--	UDP-rhamnose:rhamnosyltransferase [Actinidia chinensis var. chinensis]
gene-CEY00_Acc14478	33	35	37	115	74	99	0.534722	0.587244	0.566293	1.7208	1.21065	1.23429	1.39e-05	1.0254	up	--	--	Molecular Function: electron carrier activity (GO:0009055);;	--	--	--	--	Plastocyanin-like domain	Umecyanin OS=Armoracia rusticana OX=3704 PE=1 SV=1	S	Function unknown	Blue copper protein, partial [Actinidia chinensis var. chinensis]
gene-CEY00_Acc30382	610	587	759	213	290	299	38.3617	37.402	44.6005	12.1716	18.1585	14.1814	2.56e-18	-1.2824	down	--	--	--	--	--	--	--	--	Photosystem II 5 kDa protein, chloroplastic OS=Gossypium hirsutum OX=3635 GN=PSBT PE=4 SV=1	S	Function unknown	Photosystem II protein [Actinidia chinensis var. chinensis]
gene-CEY00_Acc01909	21	15	21	107	54	113	0.506705	0.366701	0.471968	2.3851	1.31901	2.08545	4.09e-09	1.46888	up	--	--	--	--	--	--	--	--	--	--	--	U3 small nucleolar RNA-associated protein like [Actinidia chinensis var. chinensis]
gene-CEY00_Acc19545	31	46	64	202	141	204	1.07195	1.62559	2.08484	6.50353	4.95034	5.43371	2.15e-12	1.47991	up	--	--	Biological Process: lipid transport (GO:0006869);; Molecular Function: lipid binding (GO:0008289);;	--	--	--	--	Probable lipid transfer	--	O	Posttranslational modification, protein turnover, chaperones	Non-specific lipid-transfer protein-like protein [Actinidia chinensis var. chinensis]
gene-CEY00_Acc20832	426	471	511	199	179	312	2.83428	3.17024	3.17129	1.20314	1.18328	1.56731	6.92e-14	-1.07948	down	[V]	Defense mechanisms	Molecular Function: ATP binding (GO:0005524);; Cellular Component: integral component of membrane (GO:0016021);; Molecular Function: ATPase activity (GO:0016887);;	K08712|2.4e-138|gsl:Gasu_29800|K08712 ATP-binding cassette, subfamily G (WHITE), member 2, SNQ2 | (RefSeq) ABC transporter, ATP-binding protein	ABC transporters (ko02010)	[Q]	Secondary metabolites biosynthesis, transport and catabolism	ABC-2 type transporter	Pleiotropic drug resistance protein 2 OS=Nicotiana plumbaginifolia OX=4092 GN=PDR2 PE=2 SV=1	Q	Secondary metabolites biosynthesis, transport and catabolism	Pleiotropic drug resistance protein [Actinidia chinensis var. chinensis]
gene-CEY00_Acc12224	17	25	28	86	70	86	0.311898	0.467642	0.474278	1.44281	1.29033	1.19755	7.7e-07	1.21344	up	[Q]	Secondary metabolites biosynthesis, transport and catabolism	Biological Process: fatty acid biosynthetic process (GO:0006633);; Cellular Component: integral component of membrane (GO:0016021);; Molecular Function: transferase activity, transferring acyl groups other than amino-acyl groups (GO:0016747);;	K15397|2.1e-186|ini:109193261|K15397 3-ketoacyl-CoA synthase [EC:2.3.1.199] | (RefSeq) 3-ketoacyl-CoA synthase 17-like	Fatty acid elongation (ko00062);; Plant-pathogen interaction (ko04626)	--	--	FAE1/Type III polyketide synthase-like protein	3-ketoacyl-CoA synthase 4 OS=Arabidopsis thaliana OX=3702 GN=KCS4 PE=2 SV=1	I	Lipid transport and metabolism	3-ketoacyl-CoA synthase [Actinidia chinensis var. chinensis]
gene-CEY00_Acc27061	198	193	188	597	434	567	3.74849	3.69896	3.32497	10.3101	8.21168	8.12737	5.6e-19	1.24077	up	--	--	--	K22849|1.2e-63|vvi:100242564|K22849 diacylglycerol O-acyltransferase 3, plant [EC:2.3.1.20] | (RefSeq) uncharacterized LOC100242564	Glycerolipid metabolism (ko00561)	--	--	--	Diacylglycerol O-acyltransferase 3 OS=Arabidopsis thaliana OX=3702 GN=DGAT3 PE=1 SV=2	--	--	NEDD8 ultimate buster like [Actinidia chinensis var. chinensis]
gene-CEY00_Acc16225	159	129	177	35	74	76	8.22974	6.74835	8.56722	1.64983	3.78702	2.95865	3.04e-07	-1.1463	down	--	--	--	--	--	--	--	--	Photosystem II 5 kDa protein, chloroplastic OS=Gossypium hirsutum OX=3635 GN=PSBT PE=4 SV=1	S	Function unknown	Photosystem II protein [Actinidia chinensis var. chinensis]
gene-CEY00_Acc16987	175	142	142	57	44	72	3.62438	2.967	2.74846	1.06028	0.893485	1.1223	4.22e-11	-1.29825	down	--	--	Cellular Component: integral component of membrane (GO:0016021);; Molecular Function: transmembrane transporter activity (GO:0022857);;	K17500|2.4e-56|nto:104085001|K17500 integrin-linked kinase-associated serine/threonine phosphatase 2C [EC:3.1.3.16] | (RefSeq) WAT1-related protein At3g18200 isoform X1	--	--	--	EamA-like transporter family	WAT1-related protein At5g07050 OS=Arabidopsis thaliana OX=3702 GN=At5g07050 PE=2 SV=1	S	Function unknown	WAT1-related protein [Actinidia chinensis var. chinensis]
gene-CEY00_Acc13943	130	100	167	532	312	410	2.46297	1.91916	2.95381	9.21517	5.90662	5.88072	1.52e-12	1.32571	up	--	--	Biological Process: cell morphogenesis (GO:0000902);; Biological Process: cell morphogenesis involved in differentiation (GO:0000904);; Biological Process: response to acid chemical (GO:0001101);; Biological Process: regulation of immune system process (GO:0002682);; Biological Process: regulation of response to biotic stimulus (GO:0002831);; Biological Process: regionalization (GO:0003002);; Mol…	--	--	[R]	General function prediction only	Leucine rich repeat	Receptor like protein 29 OS=Arabidopsis thaliana OX=3702 GN=RLP29 PE=2 SV=1	U	Intracellular trafficking, secretion, and vesicular transport	Protein TOO MANY MOUTHS like [Actinidia chinensis var. chinensis]
gene-CEY00_Acc19252	102	108	150	269	250	403	2.35212	2.53526	3.23994	5.69057	5.78351	7.07403	3.38e-10	1.08104	up	[Q]	Secondary metabolites biosynthesis, transport and catabolism	Molecular Function: oxidoreductase activity (GO:0016491);; Molecular Function: metal ion binding (GO:0046872);;	K05933|4.6e-164|qsu:112025436|K05933 aminocyclopropanecarboxylate oxidase [EC:1.14.17.4] | (RefSeq) 1-aminocyclopropane-1-carboxylate oxidase 3	Cysteine and methionine metabolism (ko00270)	[QR]	Secondary metabolites biosynthesis, transport and catabolism;; General function prediction only	2OG-Fe(II) oxygenase superfamily	1-aminocyclopropane-1-carboxylate oxidase OS=Diospyros kaki OX=35925 GN=DK-ACO1 PE=2 SV=1	Q	Secondary metabolites biosynthesis, transport and catabolism	1-aminocyclopropane-1-carboxylate oxidase [Actinidia chinensis var. chinensis]
gene-CEY00_Acc18268	32	73	40	128	149	182	0.587323	1.38232	0.693452	2.20636	2.80564	2.59169	4.05e-07	1.17764	up	[IR]	Lipid transport and metabolism;; General function prediction only	Molecular Function: hydrolase activity, acting on ester bonds (GO:0016788);;	K10691|1.3e-48|ats:109762802|K10691 E3 ubiquitin-protein ligase UBR4 [EC:2.3.2.27] | (RefSeq) LOC109762802; auxin transport protein BIG	--	--	--	GDSL-like Lipase/Acylhydrolase	GDSL esterase/lipase At1g74460 OS=Arabidopsis thaliana OX=3702 GN=At1g74460 PE=2 SV=1	I	Lipid transport and metabolism	GDSL esterase/lipase [Actinidia chinensis var. chinensis]
gene-CEY00_Acc15786	114	133	124	703	719	879	1.88981	2.23285	1.92759	10.6603	11.9394	11.055	1.18e-74	2.3386	up	[G]	Carbohydrate transport and metabolism	Molecular Function: trehalose-phosphatase activity (GO:0004805);; Biological Process: trehalose biosynthetic process (GO:0005992);;	K01087|6.2e-179|hbr:110650217|K01087 trehalose 6-phosphate phosphatase [EC:3.1.3.12] | (RefSeq) probable trehalose-phosphate phosphatase F isoform X1	Starch and sucrose metabolism (ko00500)	[G]	Carbohydrate transport and metabolism	Trehalose-phosphatase	Probable trehalose-phosphate phosphatase F OS=Arabidopsis thaliana OX=3702 GN=TPPF PE=2 SV=1	G	Carbohydrate transport and metabolism	Trehalose-phosphate phosphatase [Actinidia chinensis var. chinensis]
gene-CEY00_Acc32939	21	25	25	63	125	148	1.22366	1.45936	1.31954	3.30922	7.25756	6.4991	2.87e-09	1.47549	up	[HC]	Coenzyme transport and metabolism;; Energy production and conversion	Molecular Function: oxidoreductase activity (GO:0016491);;	K20784|5.0e-19|vcn:VOLCADRAFT_106094|K20784 arabinosyltransferase [EC:2.4.2.-] | (RefSeq) hypothetical protein	Other types of O-glycan biosynthesis (ko00514)	--	--	Oxidoreductase NAD-binding domain	Fruit protein pKIWI502 OS=Actinidia deliciosa OX=3627 GN=pKIWI502 PE=2 SV=1	--	--	Fruit protein like [Actinidia chinensis var. chinensis]
gene-CEY00_Acc15046	30	37	35	106	134	166	1.12123	1.40801	1.2415	3.70545	5.15072	4.83388	8.43e-12	1.48034	up	[K]	Transcription	Molecular Function: O-methyltransferase activity (GO:0008171);; Biological Process: methylation (GO:0032259);;	K16040|3.3e-106|vvi:100254011|K16040 trans-resveratrol di-O-methyltransferase [EC:2.1.1.240] | (RefSeq) trans-resveratrol di-O-methyltransferase	Stilbenoid, diarylheptanoid and gingerol biosynthesis (ko00945)	[R]	General function prediction only	O-methyltransferase domain	Probable O-methyltransferase 3 OS=Humulus lupulus OX=3486 GN=OMT3 PE=2 SV=1	J	Translation, ribosomal structure and biogenesis	Trans-resveratrol di-O-methyltransferase [Actinidia chinensis var. chinensis]
gene-CEY00_Acc10987	7	7	8	68	32	48	0.203386	0.231913	0.230997	2.05427	1.03511	1.20009	2.7e-07	1.40977	up	--	--	Molecular Function: kinase activity (GO:0016301);;	--	--	[T]	Signal transduction mechanisms	SPARK	Probable receptor-like protein kinase At1g11050 OS=Arabidopsis thaliana OX=3702 GN=At1g11050 PE=2 SV=1	T	Signal transduction mechanisms	Receptor-like protein kinase [Actinidia chinensis var. chinensis]
gene-CEY00_Acc24103	125	79	73	365	316	444	2.59587	1.67152	1.42264	6.93921	6.57614	7.00021	9.74e-22	1.65655	up	--	--	Molecular Function: DNA binding (GO:0003677);; Cellular Component: nucleus (GO:0005634);; Biological Process: regulation of transcription, DNA-templated (GO:0006355);;	K00521|5.7e-44|cmos:111447866|K00521 ferric-chelate reductase [EC:1.16.1.7] | (RefSeq) ferric reduction oxidase 7, chloroplastic-like	--	--	--	No apical meristem (NAM) protein	NAC domain-containing protein 2 OS=Arabidopsis thaliana OX=3702 GN=NAC002 PE=1 SV=2	K	Transcription	NAC domain-containing protein [Actinidia chinensis var. chinensis]
gene-CEY00_Acc30699	67	50	69	143	151	187	1.36693	1.03558	1.32245	2.67489	3.08448	2.89924	7.19e-08	1.05917	up	--	--	Molecular Function: structural constituent of ribosome (GO:0003735);; Cellular Component: mitochondrial outer membrane (GO:0005741);; Cellular Component: ribosome (GO:0005840);; Biological Process: translation (GO:0006412);; Molecular Function: voltage-gated anion channel activity (GO:0008308);;	K15040|1.7e-60|cann:107858792|K15040 voltage-dependent anion channel protein 2 | (RefSeq) mitochondrial outer membrane protein porin of 34 kDa	--	[P]	Inorganic ion transport and metabolism	Eukaryotic porin	Mitochondrial outer membrane protein porin of 34 kDa OS=Solanum tuberosum OX=4113 PE=1 SV=2	P	Inorganic ion transport and metabolism	Eukaryotic porin/Tom40 protein [Actinidia chinensis var. chinensis]
gene-CEY00_Acc26082	57	65	61	210	135	207	1.43941	1.66831	1.43942	4.89625	3.44357	4.01415	2.67e-10	1.23587	up	--	--	Molecular Function: metal ion binding (GO:0046872);;	K10666|4.7e-82|vvi:100257429|K10666 E3 ubiquitin-protein ligase RNF5 [EC:2.3.2.27] | (RefSeq) E3 ubiquitin-protein ligase RMA1H1	Protein processing in endoplasmic reticulum (ko04141)	[O]	Posttranslational modification, protein turnover, chaperones	Zinc finger, C3HC4 type (RING finger)	E3 ubiquitin-protein ligase RMA1H1 OS=Capsicum annuum OX=4072 GN=RMA1H1 PE=1 SV=1	O	Posttranslational modification, protein turnover, chaperones	E3 ubiquitin-protein like [Actinidia chinensis var. chinensis]
gene-CEY00_Acc14850	2	1	7	48	31	42	0.020795	0.014683	0.081229	0.626525	0.445297	0.45791	3.24e-08	1.51877	up	[T]	Signal transduction mechanisms	Molecular Function: protein kinase activity (GO:0004672);; Molecular Function: ATP binding (GO:0005524);; Cellular Component: integral component of membrane (GO:0016021);; Molecular Function: carbohydrate binding (GO:0030246);;	K01176|3.4e-68|sbi:8065370|K01176 alpha-amylase [EC:3.2.1.1] | (RefSeq) alpha-amylase isozyme 2A	Starch and sucrose metabolism (ko00500)	--	--	Legume lectin domain	L-type lectin-domain containing receptor kinase IV.2 OS=Arabidopsis thaliana OX=3702 GN=LECRK42 PE=2 SV=1	T	Signal transduction mechanisms	Lectin-receptor kinase [Actinidia chinensis var. chinensis]
gene-CEY00_Acc33021	532	532	505	1104	1038	1430	9.6648	9.78068	8.55964	18.2661	18.805	19.6211	7.87e-24	1.0154	up	[R]	General function prediction only	--	--	--	[S]	Function unknown	--	--	O	Posttranslational modification, protein turnover, chaperones	Tetratricopeptide repeat protein like [Actinidia chinensis var. chinensis]
gene-CEY00_Acc06597	464	434	528	117	152	203	14.2613	13.5012	15.1636	3.25147	4.64839	4.70451	4.7e-26	-1.57167	down	--	--	Cellular Component: photosystem I (GO:0009522);; Cellular Component: photosystem II (GO:0009523);; Cellular Component: chloroplast thylakoid membrane (GO:0009535);; Biological Process: photosynthesis, light harvesting (GO:0009765);; Cellular Component: integral component of membrane (GO:0016021);; Molecular Function: chlorophyll binding (GO:0016168);; Biological Process: protein-chromophore linka…	K08912|3.8e-140|oeu:111402246|K08912 light-harvesting complex II chlorophyll a/b binding protein 1 | (RefSeq) chlorophyll a-b binding protein 21, chloroplastic-like	Photosynthesis - antenna proteins (ko00196)	--	--	Chlorophyll A-B binding protein	Chlorophyll a-b binding protein 21, chloroplastic OS=Nicotiana tabacum OX=4097 GN=CAB21 PE=2 SV=1	C	Energy production and conversion	Chlorophyll a-b binding protein 21precursor [Actinidia chinensis var. chinensis]
gene-CEY00_Acc09772	89	96	112	341	237	316	1.08036	1.17927	1.27145	3.78011	2.88191	2.91072	1.76e-14	1.30067	up	[I]	Lipid transport and metabolism	Molecular Function: lanosterol synthase activity (GO:0000250);; Cellular Component: lipid droplet (GO:0005811);; Biological Process: triterpenoid biosynthetic process (GO:0016104);; Molecular Function: beta-amyrin synthase activity (GO:0042300);;	K20659|0.0e+00|vvi:100241546|K20659 lupeol synthase [EC:5.4.99.41] | (RefSeq) lupeol synthase	Sesquiterpenoid and triterpenoid biosynthesis (ko00909)	[I]	Lipid transport and metabolism	Squalene-hopene cyclase C-terminal domain	Lupeol synthase OS=Betula platyphylla OX=78630 GN=OSCBPW PE=1 SV=1	I	Lipid transport and metabolism	Lupeol synthase [Actinidia chinensis var. chinensis]
gene-CEY00_Acc02201	230	234	219	74	75	120	5.82605	5.9988	5.16243	1.70457	1.87303	2.28687	3.02e-14	-1.30839	down	--	--	Molecular Function: protein serine/threonine phosphatase activity (GO:0004722);; Molecular Function: cation binding (GO:0043169);;	K01102|1.2e-44|sind:105174701|K01102 pyruvate dehydrogenase phosphatase [EC:3.1.3.43] | (RefSeq) probable protein phosphatase 2C 38	--	[T]	Signal transduction mechanisms	--	Probable protein phosphatase 2C 38 OS=Arabidopsis thaliana OX=3702 GN=PP2C38 PE=1 SV=1	T	Signal transduction mechanisms	Protein like, partial [Actinidia chinensis var. chinensis]
gene-CEY00_Acc14979	69	113	87	259	193	266	1.07816	1.77851	1.26647	3.68431	2.99871	3.1382	4.79e-09	1.10736	up	--	--	Molecular Function: transcription factor activity, sequence-specific DNA binding (GO:0003700);; Cellular Component: nucleus (GO:0005634);; Molecular Function: sequence-specific DNA binding (GO:0043565);;	K13424|1.8e-22|nnu:104602496|K13424 WRKY transcription factor 33 | (RefSeq) WRKY transcription factor WRKY24-like	MAPK signaling pathway - plant (ko04016);; Plant-pathogen interaction (ko04626)	--	--	WRKY DNA -binding domain	WRKY transcription factor 6 OS=Arabidopsis thaliana OX=3702 GN=WRKY6 PE=1 SV=1	K	Transcription	WRKY transcription factor [Actinidia chinensis var. chinensis]
Actinidia_chinensis_newGene_104	219	261	201	74	91	95	1.74354	2.04267	1.77171	0.493081	0.83586	0.633789	6.58e-13	-1.3093	down	--	--	Molecular Function: protein kinase activity (GO:0004672);; Molecular Function: ATP binding (GO:0005524);; Biological Process: protein targeting to vacuole (GO:0006623);; Biological Process: defense response to bacterium, incompatible interaction (GO:0009816);;	K17601|2.4e-08|zju:107426746|K17601 WD repeat-containing protein 81 | (RefSeq) protein GFS12 isoform X1	--	--	--	--	--	--	--	hypothetical protein CEY00_Acc24500 [Actinidia chinensis var. chinensis]
gene-CEY00_Acc15916	425	407	448	203	151	268	5.65823	5.48245	5.57098	2.45128	1.9995	2.69243	6.4e-15	-1.09277	down	[G]	Carbohydrate transport and metabolism	Molecular Function: sucrose alpha-glucosidase activity (GO:0004575);; Biological Process: sucrose catabolic process (GO:0005987);; Molecular Function: glycopeptide alpha-N-acetylgalactosaminidase activity (GO:0033926);;	K03884|4.2e-36|nau:109243048|K03884 NADH-ubiquinone oxidoreductase chain 6 [EC:7.1.1.2] | (RefSeq) uncharacterized protein LOC109243048	Oxidative phosphorylation (ko00190)	--	--	Alkaline and neutral invertase	Alkaline/neutral invertase CINV2 OS=Arabidopsis thaliana OX=3702 GN=CINV2 PE=1 SV=1	S	Function unknown	Alkaline/neutral invertase [Actinidia chinensis var. chinensis]
gene-CEY00_Acc30624	14	14	15	68	55	64	0.374364	0.387615	0.388519	1.75235	1.53509	1.35539	2.61e-07	1.33113	up	--	--	--	--	--	--	--	Protein of unknown function (DUF1645)	--	S	Function unknown	Vicilin-like seed storage protein [Actinidia chinensis var. chinensis]
gene-CEY00_Acc30661	179	152	143	71	59	83	3.10232	2.65165	2.30697	1.1182	1.01307	1.08129	9.07e-09	-1.09985	down	--	--	Cellular Component: integral component of membrane (GO:0016021);; Molecular Function: transmembrane transporter activity (GO:0022857);;	K14638|2.6e-204|tcc:18601350|K14638 solute carrier family 15 (peptide/histidine transporter), member 3/4 | (RefSeq) protein NRT1/ PTR FAMILY 5.9	--	[E]	Amino acid transport and metabolism	POT family	Protein NRT1/ PTR FAMILY 5.9 OS=Arabidopsis thaliana OX=3702 GN=NPF5.9 PE=2 SV=1	E	Amino acid transport and metabolism	Protein NRT1/ PTR FAMILY 5.8 like [Actinidia chinensis var. chinensis]
Actinidia_chinensis_newGene_8230	70	50	73	277	189	303	1.23472	0.875662	1.2207	4.55404	3.39327	4.13266	1.67e-18	1.60309	up	[QV]	Secondary metabolites biosynthesis, transport and catabolism;; Defense mechanisms	Molecular Function: monooxygenase activity (GO:0004497);; Molecular Function: iron ion binding (GO:0005506);; Cellular Component: integral component of membrane (GO:0016021);; Molecular Function: oxidoreductase activity, acting on paired donors, with incorporation or reduction of molecular oxygen (GO:0016705);; Molecular Function: heme binding (GO:0020037);;	K20666|6.1e-174|dzi:111309893|K20666 gibberellin 13-oxidase [EC:1.14.-.-] | (RefSeq) cytochrome P450 714B2-like	--	[QI]	Secondary metabolites biosynthesis, transport and catabolism;; Lipid transport and metabolism	Cytochrome P450	Cytochrome P450 714C2 OS=Oryza sativa subsp. japonica OX=39947 GN=CYP714C2 PE=2 SV=1	Q	Secondary metabolites biosynthesis, transport and catabolism	Cytochrome P450 714C2 like [Actinidia chinensis var. chinensis]
gene-CEY00_Acc14798	621	744	935	2744	1885	2060	17.52	21.2593	24.6267	70.5032	53.0198	43.9022	2.2e-17	1.30187	up	--	--	Molecular Function: peroxidase activity (GO:0004601);; Cellular Component: extracellular region (GO:0005576);; Biological Process: response to oxidative stress (GO:0006979);; Molecular Function: heme binding (GO:0020037);; Biological Process: hydrogen peroxide catabolic process (GO:0042744);; Molecular Function: metal ion binding (GO:0046872);;	K00430|9.4e-141|zju:107405100|K00430 peroxidase [EC:1.11.1.7] | (RefSeq) peroxidase 4-like	Phenylpropanoid biosynthesis (ko00940)	--	--	Peroxidase	Peroxidase 4 OS=Vitis vinifera OX=29760 GN=GSVIVT00023967001 PE=1 SV=1	Q	Secondary metabolites biosynthesis, transport and catabolism	Peroxidase [Actinidia chinensis var. chinensis]
gene-CEY00_Acc27165	8	29	15	93	62	79	0.276049	1.03079	0.504066	3.04662	2.21967	2.14805	1.18e-06	1.29318	up	--	--	Molecular Function: protein phosphatase inhibitor activity (GO:0004864);; Biological Process: defense response (GO:0006952);; Biological Process: abscisic acid-activated signaling pathway (GO:0009738);; Molecular Function: abscisic acid binding (GO:0010427);; Molecular Function: signaling receptor activity (GO:0038023);;	K05387|8.5e-10|peq:110030824|K05387 glutamate receptor, ionotropic, plant | (RefSeq) LOW QUALITY PROTEIN: glutamate receptor 2.3-like	--	--	--	Pathogenesis-related protein Bet v 1 family	Major allergen Pru ar 1 OS=Prunus armeniaca OX=36596 PE=1 SV=1	S	Function unknown	Major allergen Pru ar like [Actinidia chinensis var. chinensis]
gene-CEY00_Acc12577	51	56	74	154	123	174	0.661102	0.729722	0.899028	1.83332	1.59238	1.71345	7.17e-07	1.00173	up	--	--	Molecular Function: inorganic anion exchanger activity (GO:0005452);; Cellular Component: integral component of membrane (GO:0016021);;	K24194|0.0e+00|tcc:18595786|K24194 boron transporter | (RefSeq) boron transporter 4	--	[P]	Inorganic ion transport and metabolism	HCO3- transporter family	Boron transporter 4 OS=Arabidopsis thaliana OX=3702 GN=BOR4 PE=2 SV=1	P	Inorganic ion transport and metabolism	Boron transporter like [Actinidia chinensis var. chinensis]
gene-CEY00_Acc09764	212	202	188	29	62	102	3.65681	3.51313	3.02144	0.449547	1.05801	1.32245	5.16e-10	-1.3968	down	[P]	Inorganic ion transport and metabolism	Molecular Function: cation transmembrane transporter activity (GO:0008324);; Cellular Component: integral component of membrane (GO:0016021);;	--	--	[P]	Inorganic ion transport and metabolism	Cation transport protein	Probable cation transporter HKT6 OS=Oryza sativa subsp. japonica OX=39947 GN=HKT6 PE=2 SV=2	P	Inorganic ion transport and metabolism	Cation transporter like [Actinidia chinensis var. chinensis]
gene-CEY00_Acc31618	73	62	101	221	209	289	1.84769	1.59036	2.3857	5.12006	5.30121	5.56356	8.62e-13	1.28854	up	[O]	Posttranslational modification, protein turnover, chaperones	Molecular Function: transferase activity (GO:0016740);;	K00799|3.7e-85|nnu:104598999|K00799 glutathione S-transferase [EC:2.5.1.18] | (RefSeq) glutathione S-transferase-like	Glutathione metabolism (ko00480)	[O]	Posttranslational modification, protein turnover, chaperones	Glutathione S-transferase, N-terminal domain	Glutathione S-transferase APIC OS=Nicotiana tabacum OX=4097 GN=APIC PE=2 SV=1	O	Posttranslational modification, protein turnover, chaperones	Glutathione S-transferase [Actinidia chinensis var. chinensis]
gene-CEY00_Acc04577	22	16	10	46	55	59	0.405945	0.305903	0.179105	0.802083	1.03849	0.856401	0.000189854	1.02327	up	[QV]	Secondary metabolites biosynthesis, transport and catabolism;; Defense mechanisms	Molecular Function: monooxygenase activity (GO:0004497);; Molecular Function: iron ion binding (GO:0005506);; Molecular Function: oxidoreductase activity, acting on paired donors, with incorporation or reduction of molecular oxygen (GO:0016705);; Molecular Function: heme binding (GO:0020037);;	K20617|3.7e-168|lja:Lj3g3v1475790.2|K20617 cytochrome P450 family 71 subfamily A | (RefSeq) Lj3g3v1475790.2; -	--	[Q]	Secondary metabolites biosynthesis, transport and catabolism	Cytochrome P450	Cytochrome P450 83B1 OS=Arabidopsis thaliana OX=3702 GN=CYP83B1 PE=1 SV=1	Q	Secondary metabolites biosynthesis, transport and catabolism	Cytochrome P450 83B1 like [Actinidia chinensis var. chinensis]
gene-CEY00_Acc10840	43	62	55	671	506	720	0.745643	1.08796	0.883375	10.6017	8.7562	9.4309	4.08e-88	3.0728	up	--	--	Cellular Component: integral component of membrane (GO:0016021);;	K19476|1.9e-82|cic:CICLE_v10026997mg|K19476 vacuolar protein sorting-associated protein IST1 | (RefSeq) hypothetical protein	Endocytosis (ko04144)	[E]	Amino acid transport and metabolism	Transmembrane amino acid transporter protein	Lysine histidine transporter-like 8 OS=Arabidopsis thaliana OX=3702 GN=AATL1 PE=1 SV=1	E	Amino acid transport and metabolism	Lysine histidine transporter-like [Actinidia chinensis var. chinensis]
gene-CEY00_Acc31986	147	121	123	351	241	354	4.03817	3.375	3.16213	8.81254	6.62765	7.37292	4.22e-10	1.02815	up	--	--	Molecular Function: cyclin-dependent protein serine/threonine kinase inhibitor activity (GO:0004861);; Cellular Component: nucleus (GO:0005634);; Biological Process: cell cycle arrest (GO:0007050);; Molecular Function: kinase activity (GO:0016301);;	--	--	--	--	Cyclin-dependent kinase inhibitor	Cyclin-dependent kinase inhibitor 3 OS=Arabidopsis thaliana OX=3702 GN=KRP3 PE=1 SV=1	S	Function unknown	Cyclin-dependent kinase [Actinidia chinensis var. chinensis]
gene-CEY00_Acc27173	18	15	14	89	60	68	0.700927	0.596786	0.49983	3.25267	2.38476	2.0578	4.18e-08	1.40229	up	--	--	Molecular Function: protein phosphatase inhibitor activity (GO:0004864);; Biological Process: defense response (GO:0006952);; Biological Process: abscisic acid-activated signaling pathway (GO:0009738);; Molecular Function: abscisic acid binding (GO:0010427);; Molecular Function: signaling receptor activity (GO:0038023);;	--	--	--	--	Pathogenesis-related protein Bet v 1 family	Major allergen Pru ar 1 OS=Prunus armeniaca OX=36596 PE=1 SV=1	S	Function unknown	Major allergen Pru ar like [Actinidia chinensis var. chinensis]
gene-CEY00_Acc33722	17	21	17	83	63	85	0.323081	0.407967	0.299044	1.49181	1.24058	1.25976	2.52e-08	1.37637	up	--	--	Cellular Component: integral component of membrane (GO:0016021);;	--	--	--	--	Plant protein of unknown function	UPF0481 protein At3g47200 OS=Arabidopsis thaliana OX=3702 GN=At3g47200 PE=2 SV=1	S	Function unknown	UPF0481 protein [Actinidia chinensis var. chinensis]
gene-CEY00_Acc25154	20	16	25	73	52	62	0.500189	0.386443	0.587644	1.67611	1.30081	1.18389	9.41e-05	1.02714	up	--	--	Molecular Function: DNA binding (GO:0003677);; Cellular Component: nucleus (GO:0005634);;	K14491|3.9e-07|bna:106417794|K14491 two-component response regulator ARR-B family | (RefSeq) two-component response regulator ARR18	Plant hormone signal transduction (ko04075)	--	--	--	Myb family transcription factor MOF1 OS=Oryza sativa subsp. japonica OX=39947 GN=MOF1 PE=1 SV=1	K	Transcription	Myb family transcription factor [Actinidia chinensis var. chinensis]
gene-CEY00_Acc06869	241	226	258	635	564	840	5.12055	4.86376	5.1289	12.3098	11.9745	13.5162	8.81e-27	1.28306	up	--	--	--	--	--	--	--	Protein of unknown function (DUF1005)	--	S	Function unknown	NADPH oxidase [Actinidia chinensis var. chinensis]
gene-CEY00_Acc33218	56	50	64	374	434	487	0.976412	0.890775	1.04948	6.01431	7.64731	6.50035	6.53e-53	2.48711	up	[QV]	Secondary metabolites biosynthesis, transport and catabolism;; Defense mechanisms	Molecular Function: monooxygenase activity (GO:0004497);; Molecular Function: iron ion binding (GO:0005506);; Cellular Component: integral component of membrane (GO:0016021);; Molecular Function: oxidoreductase activity, acting on paired donors, with incorporation or reduction of molecular oxygen (GO:0016705);; Molecular Function: heme binding (GO:0020037);;	K20667|1.7e-242|sind:105173756|K20667 beta-amyrin 28-monooxygenase [EC:1.14.14.126] | (RefSeq) beta-amyrin 28-oxidase-like	--	[QI]	Secondary metabolites biosynthesis, transport and catabolism;; Lipid transport and metabolism	Cytochrome P450	Beta-amyrin 28-monooxygenase OS=Panax ginseng OX=4054 GN=CYP716A52v2 PE=1 SV=1	Q	Secondary metabolites biosynthesis, transport and catabolism	Beta-amyrin 28-oxidase [Actinidia chinensis var. chinensis]
gene-CEY00_Acc25188	28	15	46	109	67	92	0.411503	0.216808	0.635607	1.47057	0.98531	1.02655	0.000120515	1.01297	up	[T]	Signal transduction mechanisms	Molecular Function: ATP binding (GO:0005524);; Cellular Component: integral component of membrane (GO:0016021);; Molecular Function: ATPase activity (GO:0016887);;	K05681|2.1e-131|aip:107621880|K05681 ATP-binding cassette, subfamily G (WHITE), member 2 | (RefSeq) ABC transporter G family member 5-like	ABC transporters (ko02010)	[Q]	Secondary metabolites biosynthesis, transport and catabolism	ABC-2 type transporter	ABC transporter G family member 23 OS=Arabidopsis thaliana OX=3702 GN=ABCG23 PE=2 SV=1	Q	Secondary metabolites biosynthesis, transport and catabolism	ABC transporter G family member 23 like [Actinidia chinensis var. chinensis]
Actinidia_chinensis_newGene_3044	356	415	349	209	140	208	2.94823	3.92987	3.16694	1.67325	1.13529	1.42946	2.41e-11	-1.03567	down	--	--	--	--	--	--	--	--	--	S	Function unknown	E3 ubiquitin-protein like [Actinidia chinensis var. chinensis]
gene-CEY00_Acc19075	35	26	36	161	82	120	0.728439	0.547153	0.69674	3.09808	1.73057	1.91291	2.09e-08	1.32957	up	--	--	--	--	--	--	--	VQ motif	VQ motif-containing protein 22 OS=Arabidopsis thaliana OX=3702 GN=VQ22 PE=2 SV=1	S	Function unknown	VQ motif-containing protein [Actinidia chinensis var. chinensis]
gene-CEY00_Acc30819	30	12	22	75	68	102	0.537964	0.203587	0.369138	1.2311	1.21078	1.37649	5.56e-07	1.26258	up	[E]	Amino acid transport and metabolism	Molecular Function: proline dehydrogenase activity (GO:0004657);; Biological Process: proline catabolic process (GO:0006562);;	K00318|7.5e-169|dzi:111305795|K00318 proline dehydrogenase [EC:1.5.5.2] | (RefSeq) proline dehydrogenase 2, mitochondrial-like	Arginine and proline metabolism (ko00330)	[E]	Amino acid transport and metabolism	Proline dehydrogenase	Proline dehydrogenase 2, mitochondrial OS=Arabidopsis thaliana OX=3702 GN=POX2 PE=2 SV=1	E	Amino acid transport and metabolism	Proline dehydrogenase [Actinidia chinensis var. chinensis]
gene-CEY00_Acc32761	199	156	135	576	475	591	3.96877	3.1563	2.51708	10.4886	9.46987	8.94057	3.87e-23	1.47786	up	--	--	Cellular Component: nucleus (GO:0005634);;	--	--	--	--	Remorin, C-terminal region	--	S	Function unknown	Remorin like [Actinidia chinensis var. chinensis]
gene-CEY00_Acc09945	49	56	70	20	21	29	0.466864	0.538595	0.616447	0.167623	0.190642	0.206845	8.99e-05	-1.0158	down	--		Molecular Function: protein kinase activity (GO:0004672);; Molecular Function: ATP binding (GO:0005524);;	K14510|2.7e-48|oeu:111383843|K14510 serine/threonine-protein kinase CTR1 [EC:2.7.11.1] | (RefSeq) serine/threonine-protein kinase CTR1-like isoform X1	MAPK signaling pathway - plant (ko04016);; Plant hormone signal transduction (ko04075)	[T]	Signal transduction mechanisms	Protein tyrosine and serine/threonine kinase	Probable serine/threonine-protein kinase SIS8 OS=Arabidopsis thaliana OX=3702 GN=SIS8 PE=1 SV=1	T	Signal transduction mechanisms	Serine/threonine-protein kinase [Actinidia chinensis var. chinensis]
gene-CEY00_Acc16054	126	143	98	353	265	386	3.33637	3.82167	2.41513	8.52042	7.00628	7.73924	2.88e-12	1.17374	up	[P]	Inorganic ion transport and metabolism	Molecular Function: gamma-glutamylcyclotransferase activity (GO:0003839);; Biological Process: glutathione catabolic process (GO:0006751);; Molecular Function: transferase activity (GO:0016740);;	K22596|1.9e-100|jre:109009548|K22596 gamma-glutamylcyclotransferase, plant [EC:4.3.2.9] | (RefSeq) gamma-glutamylcyclotransferase 2-1-like	Glutathione metabolism (ko00480)	[P]	Inorganic ion transport and metabolism	ChaC-like protein	Gamma-glutamylcyclotransferase 2-2 OS=Arabidopsis thaliana OX=3702 GN=GGCT2;2 PE=1 SV=1	P	Inorganic ion transport and metabolism	Gamma-glutamylcyclotransferase [Actinidia chinensis var. chinensis]
gene-CEY00_Acc29257	103	117	118	61	42	49	3.09038	3.55817	3.29555	1.66184	1.2324	1.10461	2.07e-06	-1.03177	down	--	--	Biological Process: regulation of transcription, DNA-templated (GO:0006355);; Molecular Function: protein dimerization activity (GO:0046983);;	K18878|1.9e-28|cann:107866053|K18878 BHLH transcription factor Upa20 | (RefSeq) Upa20; transcription factor bHLH137-like	Plant-pathogen interaction (ko04626)	--	--	Helix-loop-helix DNA-binding domain	Transcription factor BEE 3 OS=Arabidopsis thaliana OX=3702 GN=BEE3 PE=2 SV=1	K	Transcription	Transcription factor BEE like [Actinidia chinensis var. chinensis]
gene-CEY00_Acc31025	16	13	23	65	55	77	0.524269	0.423197	0.709252	1.95368	1.79499	1.93035	1.92e-06	1.22559	up	--	--	Biological Process: reproduction (GO:0000003);; Biological Process: regionalization (GO:0003002);; Biological Process: developmental process involved in reproduction (GO:0003006);; Biological Process: regulation of transcription, DNA-templated (GO:0006355);; Biological Process: multicellular organism development (GO:0007275);; Biological Process: pattern specification process (GO:0007389);; Biolo…	K13944|1.7e-27|lsv:111902507|K13944 LOB domain-containing protein 16 | (RefSeq) LOB domain-containing protein 16-like	--	--	--	Lateral organ boundaries (LOB) domain	LOB domain-containing protein 36 OS=Arabidopsis thaliana OX=3702 GN=LBD36 PE=2 SV=1	S	Function unknown	LOB domain-containing protein [Actinidia chinensis var. chinensis]
gene-CEY00_Acc26295	11	26	17	76	63	81	0.198117	0.481242	0.294825	1.27368	1.1665	1.13591	5.34e-07	1.28759	up	[QV]	Secondary metabolites biosynthesis, transport and catabolism;; Defense mechanisms	Molecular Function: monooxygenase activity (GO:0004497);; Molecular Function: iron ion binding (GO:0005506);; Molecular Function: oxidoreductase activity, acting on paired donors, with incorporation or reduction of molecular oxygen (GO:0016705);; Molecular Function: heme binding (GO:0020037);;	K23806|2.9e-184|vvi:100246293|K23806 alpha-guaiene 2-oxidase | (RefSeq) premnaspirodiene oxygenase-like	--	[Q]	Secondary metabolites biosynthesis, transport and catabolism	Cytochrome P450	Cytochrome P450 71D10 OS=Glycine max OX=3847 GN=CYP71D10 PE=2 SV=1	Q	Secondary metabolites biosynthesis, transport and catabolism	Cytochrome P450 71D10 like [Actinidia chinensis var. chinensis]
gene-CEY00_Acc29758	1308	1121	1145	7733	5447	5834	44.7096	38.7797	36.506	240.525	185.538	150.554	2.92e-59	2.13948	up	--	--	Molecular Function: RNA binding (GO:0003723);; Molecular Function: ribonuclease T2 activity (GO:0033897);;	K01166|4.5e-30|nsy:104248071|K01166 ribonuclease T2 [EC:4.6.1.19] | (RefSeq) ribonuclease 3-like	--	--	--	Ribonuclease T2 family	--	A	RNA processing and modification	Extracellular ribonuclease like [Actinidia chinensis var. chinensis]
gene-CEY00_Acc05057	59	73	91	292	301	345	1.55731	1.95059	2.25867	7.0748	7.99923	6.93605	1.85e-24	1.72318	up	--	--	Molecular Function: DNA binding (GO:0003677);; Cellular Component: nucleus (GO:0005634);; Biological Process: regulation of transcription, DNA-templated (GO:0006355);;	K00521|1.6e-43|cmos:111447866|K00521 ferric-chelate reductase [EC:1.16.1.7] | (RefSeq) ferric reduction oxidase 7, chloroplastic-like	--	--	--	No apical meristem (NAM) protein	NAC domain-containing protein 2 OS=Arabidopsis thaliana OX=3702 GN=NAC002 PE=1 SV=2	K	Transcription	NAC domain-containing protein [Actinidia chinensis var. chinensis]
gene-CEY00_Acc32146	4	6	8	37	36	41	0.033258	0.051891	0.062044	0.289523	0.312292	0.265082	2.75e-06	1.30376	up	--	--	Molecular Function: kinase activity (GO:0016301);;	K13466|9.5e-51|cit:102616085|K13466 EIX receptor 1/2 | (RefSeq) receptor-like protein EIX1	Plant-pathogen interaction (ko04626)	--	--	Leucine rich repeat	Receptor-like protein EIX1 OS=Solanum lycopersicum OX=4081 GN=EIX1 PE=2 SV=2	L	Replication, recombination and repair	LRR receptor-like serine/threonine-protein kinase [Actinidia chinensis var. chinensis]
gene-CEY00_Acc06449	26	17	49	83	87	116	0.470412	0.307799	0.817606	1.36311	1.56689	1.59064	2.22e-05	1.07846	up	[C]	Energy production and conversion	Molecular Function: oxidoreductase activity (GO:0016491);; Molecular Function: FAD binding (GO:0071949);;	K22395|4.2e-194|nsy:104227327|K22395 cinnamyl-alcohol dehydrogenase [EC:1.1.1.195] | (RefSeq) cannabidiolic acid synthase-like	Phenylpropanoid biosynthesis (ko00940)	--	--	FAD binding domain	Berberine bridge enzyme-like 18 OS=Arabidopsis thaliana OX=3702 GN=At4g20820 PE=3 SV=1	C	Energy production and conversion	Berberine bridge enzyme-like [Actinidia chinensis var. chinensis]
gene-CEY00_Acc19793	215	207	250	575	439	541	3.60204	3.51638	3.91912	8.79497	7.34283	6.85579	4.45e-13	1.01223	up	--	--	Molecular Function: transcription factor activity, sequence-specific DNA binding (GO:0003700);; Cellular Component: nucleus (GO:0005634);; Molecular Function: sequence-specific DNA binding (GO:0043565);;	K16225|2.4e-17|csat:104760397|K16225 probable WRKY transcription factor 52 | (RefSeq) disease resistance protein RRS1-like	Plant-pathogen interaction (ko04626)	--	--	WRKY DNA -binding domain	Probable WRKY transcription factor 53 OS=Arabidopsis thaliana OX=3702 GN=WRKY53 PE=1 SV=1	K	Transcription	WRKY transcription factor 53 [Actinidia chinensis var. chinensis]
gene-CEY00_Acc29001	75	69	72	23	21	33	1.44326	1.34653	1.29611	0.39332	0.395946	0.477942	7.34e-07	-1.19923	down	--	--	Molecular Function: AT DNA binding (GO:0003680);; Molecular Function: transcription factor activity, sequence-specific DNA binding (GO:0003700);; Cellular Component: nucleus (GO:0005634);;	--	--	--	--	Plants and Prokaryotes Conserved (PCC) domain	AT-hook motif nuclear-localized protein 23 OS=Arabidopsis thaliana OX=3702 GN=AHL23 PE=1 SV=1	K	Transcription	AT-hook motif nuclear-localized protein [Actinidia chinensis var. chinensis]
gene-CEY00_Acc31596	1141	1033	950	514	371	494	23.2211	21.2863	18.0366	9.51281	7.5262	7.57974	4.22e-23	-1.22805	down	[G]	Carbohydrate transport and metabolism	Molecular Function: hydrolase activity, hydrolyzing O-glycosyl compounds (GO:0004553);; Biological Process: carbohydrate metabolic process (GO:0005975);;	K01188|6.5e-208|qsu:111994637|K01188 beta-glucosidase [EC:3.2.1.21] | (RefSeq) beta-glucosidase 11-like	Cyanoamino acid metabolism (ko00460);; Starch and sucrose metabolism (ko00500);; Phenylpropanoid biosynthesis (ko00940)	[G]	Carbohydrate transport and metabolism	Glycosyl hydrolase family 1	Beta-glucosidase 11 OS=Arabidopsis thaliana OX=3702 GN=BGLU11 PE=2 SV=2	G	Carbohydrate transport and metabolism	Beta-glucosidase, partial [Actinidia chinensis var. chinensis]
gene-CEY00_Acc23937	227	223	266	806	401	571	5.01507	4.97721	5.48127	16.2002	8.82633	9.52263	1.8e-08	1.03775	up	[J]	Translation, ribosomal structure and biogenesis	Molecular Function: mRNA binding (GO:0003729);;	K12741|2.9e-18|ppp:112291379|K12741 heterogeneous nuclear ribonucleoprotein A1/A3 | (RefSeq) UBP1-associated protein 2C-like	Spliceosome (ko03040)	[R]	General function prediction only	RNA recognition motif. (a.k.a. RRM, RBD, or RNP domain)	Probable RNA-binding protein ARP1 OS=Arabidopsis thaliana OX=3702 GN=ARP1 PE=2 SV=1	A	RNA processing and modification	RNA-binding protein [Actinidia chinensis var. chinensis]
gene-CEY00_Acc08937	14	14	22	117	93	100	0.203425	0.212692	0.299376	1.60877	1.40618	1.14539	4.04e-14	1.80112	up	--	--	Cellular Component: integral component of membrane (GO:0016021);;	--	--	--	--	--	--	--	--	Protein tweety-2 like [Actinidia chinensis var. chinensis]
gene-CEY00_Acc21483	10	12	14	47	36	53	0.161645	0.198507	0.212406	0.701383	0.583615	0.656165	7.67e-05	1.08957	up	[G]	Carbohydrate transport and metabolism	Molecular Function: polygalacturonase activity (GO:0004650);; Cellular Component: extracellular region (GO:0005576);; Biological Process: carbohydrate metabolic process (GO:0005975);; Biological Process: cell wall organization (GO:0071555);;	K01213|3.2e-179|aip:107645968|K01213 galacturan 1,4-alpha-galacturonidase [EC:3.2.1.67] | (RefSeq) polygalacturonase At1g48100-like	Pentose and glucuronate interconversions (ko00040)	--	--	Glycosyl hydrolases family 28	Polygalacturonase At1g48100 OS=Arabidopsis thaliana OX=3702 GN=At1g48100 PE=2 SV=1	G	Carbohydrate transport and metabolism	Polygalacturonase [Actinidia chinensis var. chinensis]
gene-CEY00_Acc03181	124	123	161	430	334	315	2.78727	2.80174	3.38236	8.81608	7.48185	5.35525	3.27e-10	1.13615	up	--	--	Biological Process: metal ion transport (GO:0030001);; Molecular Function: metal ion binding (GO:0046872);;	K10752|2.4e-07|zju:107427343|K10752 histone-binding protein RBBP4 | (RefSeq) LOW QUALITY PROTEIN: WD-40 repeat-containing protein MSI3	--	[P]	Inorganic ion transport and metabolism	Heavy-metal-associated domain	Heavy metal-associated isoprenylated plant protein 5 OS=Arabidopsis thaliana OX=3702 GN=HIPP05 PE=1 SV=2	P	Inorganic ion transport and metabolism	Heavy metal-associated isoprenylated plant protein, partial [Actinidia chinensis var. chinensis]
gene-CEY00_Acc01838	37	42	32	178	133	121	0.606448	0.693345	0.480321	2.67447	2.19806	1.50759	2.11e-10	1.43427	up	--	--	Molecular Function: transcription factor activity, sequence-specific DNA binding (GO:0003700);; Cellular Component: nucleus (GO:0005634);; Molecular Function: sequence-specific DNA binding (GO:0043565);;	K13424|1.3e-134|hbr:110633735|K13424 WRKY transcription factor 33 | (RefSeq) probable WRKY transcription factor 33	MAPK signaling pathway - plant (ko04016);; Plant-pathogen interaction (ko04626)	--	--	WRKY DNA -binding domain	WRKY transcription factor WRKY24 OS=Oryza sativa subsp. japonica OX=39947 GN=WRKY24 PE=2 SV=1	K	Transcription	WRKY transcription factor 33 [Actinidia chinensis var. chinensis]
gene-CEY00_Acc32592	121	99	106	390	248	364	3.49949	2.89821	2.85908	10.2829	7.15386	7.95865	7.24e-15	1.32173	up	--	--	Biological Process: cellular response to phosphate starvation (GO:0016036);;	K24195|1.6e-06|smo:SELMODRAFT_450458|K24195 xenotropic and polytropic retrovirus receptor 1 | (RefSeq) hypothetical protein	--	[P]	Inorganic ion transport and metabolism	SPX domain	SPX domain-containing protein 2 OS=Arabidopsis thaliana OX=3702 GN=SPX2 PE=2 SV=1	P	Inorganic ion transport and metabolism	SPX domain-containing protein [Actinidia chinensis var. chinensis]
gene-CEY00_Acc30498	26	30	30	85	85	92	0.644239	0.769505	0.710146	1.94821	2.14771	1.76601	1.65e-06	1.13285	up	--	--	--	--	--	--	--	GRAM domain	GEM-like protein 5 OS=Arabidopsis thaliana OX=3702 GN=At5g13200 PE=1 SV=1	S	Function unknown	GEM-like protein [Actinidia chinensis var. chinensis]
gene-CEY00_Acc27125	49	51	34	153	102	104	1.07867	1.12308	0.693336	3.07085	2.25109	1.73092	2.83e-05	1.00051	up	--	--	Molecular Function: N-acetyltransferase activity (GO:0008080);;	--	--	--	--	Acetyltransferase (GNAT) family	Probable N-acetyltransferase HLS1 OS=Arabidopsis thaliana OX=3702 GN=HLS1 PE=1 SV=1	S	Function unknown	N-acetyltransferase HLS1 [Actinidia chinensis var. chinensis]
gene-CEY00_Acc02754	37	60	52	163	132	172	0.740045	1.21454	0.971538	2.97797	2.62955	2.60804	1.1e-09	1.2558	up	--	--	Cellular Component: integral component of membrane (GO:0016021);;	K00889|8.2e-07|dcr:108218789|K00889 1-phosphatidylinositol-4-phosphate 5-kinase [EC:2.7.1.68] | (RefSeq) phosphatidylinositol 4-phosphate 5-kinase 6-like	Inositol phosphate metabolism (ko00562);; Phosphatidylinositol signaling system (ko04070);; Endocytosis (ko04144)	[R]	General function prediction only	Ankyrin repeats (many copies)	Ankyrin repeat-containing protein BDA1 OS=Arabidopsis thaliana OX=3702 GN=BAD1 PE=1 SV=1	S	Function unknown	Ankyrin repeat-containing protein [Actinidia chinensis var. chinensis]
gene-CEY00_Acc02479	94	101	102	296	198	292	1.89637	2.07972	1.93418	5.47901	3.99733	4.4847	5.95e-11	1.12858	up	--	--	Cellular Component: integral component of membrane (GO:0016021);;	K15015|1.7e-18|nnu:104598123|K15015 solute carrier family 32 (vesicular inhibitory amino acid transporter) | (RefSeq) vacuolar amino acid transporter 1-like	--	[E]	Amino acid transport and metabolism	Transmembrane amino acid transporter protein	Lysine histidine transporter 1 OS=Arabidopsis thaliana OX=3702 GN=LHT1 PE=1 SV=1	E	Amino acid transport and metabolism	Lysine histidine transporter like [Actinidia chinensis var. chinensis]
gene-CEY00_Acc03804	930	844	980	345	367	490	17.6047	16.1687	17.319	5.9292	6.91772	6.99025	7.58e-30	-1.26141	down	[E]	Amino acid transport and metabolism	Biological Process: amino acid transmembrane transport (GO:0003333);; Cellular Component: integral component of membrane (GO:0016021);;	K03834|4.4e-201|vvi:100251314|K03834 tyrosine-specific transport protein | (RefSeq) tyrosine-specific transport protein	--	--	--	Tryptophan/tyrosine permease family	--	E	Amino acid transport and metabolism	Tyrosine-specific transport protein [Actinidia chinensis var. chinensis]
gene-CEY00_Acc13627	172	203	211	538	402	470	2.18875	2.61079	2.50043	6.23607	5.10537	4.5147	5.38e-12	1.04997	up	[N]	Cell motility	Cellular Component: integral component of membrane (GO:0016021);; Molecular Function: cellulose synthase (UDP-forming) activity (GO:0016760);; Biological Process: cellulose biosynthetic process (GO:0030244);; Biological Process: cell wall organization (GO:0071555);;	K10891|2.2e-193|tcc:18612304|K10891 fanconi anemia group D2 protein | (RefSeq) Fanconi anemia group D2 protein homolog	--	--	--	Cellulose synthase	Cellulose synthase-like protein H1 OS=Oryza sativa subsp. japonica OX=39947 GN=CSLH1 PE=2 SV=2	G	Carbohydrate transport and metabolism	Cellulose synthase-like protein [Actinidia chinensis var. chinensis]
gene-CEY00_Acc02780	38	27	47	159	144	125	1.16909	0.847275	1.33619	4.48242	4.45125	2.91337	1.92e-10	1.42748	up	--	--	Molecular Function: transcription factor activity, sequence-specific DNA binding (GO:0003700);; Cellular Component: nucleus (GO:0005634);; Molecular Function: sequence-specific DNA binding (GO:0043565);;	K16225|4.1e-17|crb:17875137|K16225 probable WRKY transcription factor 52 | (RefSeq) disease resistance protein RRS1	Plant-pathogen interaction (ko04626)	--	--	WRKY DNA -binding domain	WRKY DNA-binding transcription factor 70 OS=Solanum lycopersicum OX=4081 GN=WRKY70 PE=2 SV=1	K	Transcription	WRKY transcription factor 70 [Actinidia chinensis var. chinensis]
gene-CEY00_Acc22749	41	30	26	119	73	103	0.702151	0.511225	0.41567	1.85617	1.24715	1.32055	4.77e-06	1.10599	up	--	--	Biological Process: reproduction (GO:0000003);; Biological Process: developmental process involved in reproduction (GO:0003006);; Molecular Function: molecular_function (GO:0003674);; Molecular Function: nucleic acid binding (GO:0003676);; Molecular Function: DNA binding (GO:0003677);; Molecular Function: transcription factor activity, sequence-specific DNA binding (GO:0003700);; Molecular Functi…	K01051|2.6e-12|var:108341535|K01051 pectinesterase [EC:3.1.1.11] | (RefSeq) probable pectinesterase/pectinesterase inhibitor 58	Pentose and glucuronate interconversions (ko00040)	[K]	Transcription	Myb/SANT-like DNA-binding domain	Trihelix transcription factor PTL OS=Arabidopsis thaliana OX=3702 GN=PTL PE=1 SV=1	K	Transcription	Trihelix transcription factor PTL like [Actinidia chinensis var. chinensis]
gene-CEY00_Acc11269	99	116	134	506	516	577	1.66587	1.98336	2.10091	7.77559	8.68173	7.35924	1.86e-40	1.90493	up	[QV]	Secondary metabolites biosynthesis, transport and catabolism;; Defense mechanisms	Molecular Function: iron ion binding (GO:0005506);; Molecular Function: oxidoreductase activity, acting on paired donors, with incorporation or reduction of molecular oxygen (GO:0016705);; Molecular Function: heme binding (GO:0020037);;	K20667|7.1e-162|sind:105175834|K20667 beta-amyrin 28-monooxygenase [EC:1.14.14.126] | (RefSeq) beta-amyrin 28-oxidase	--	[QI]	Secondary metabolites biosynthesis, transport and catabolism;; Lipid transport and metabolism	Cytochrome P450	Beta-amyrin 28-monooxygenase OS=Vitis vinifera OX=29760 GN=CYP716A15 PE=1 SV=1	Q	Secondary metabolites biosynthesis, transport and catabolism	Beta-amyrin 28-oxidase [Actinidia chinensis var. chinensis]
gene-CEY00_Acc01897	11	14	5	58	36	76	0.101486	0.133701	0.042708	0.502841	0.339774	0.550245	5.81e-07	1.35759	up	[T]	Signal transduction mechanisms	Molecular Function: protein serine/threonine kinase activity (GO:0004674);; Molecular Function: ATP binding (GO:0005524);; Cellular Component: integral component of membrane (GO:0016021);;	K13430|2.8e-60|hbr:110639117|K13430 serine/threonine-protein kinase PBS1 [EC:2.7.11.1] | (RefSeq) serine/threonine-protein kinase PBS1-like	Plant-pathogen interaction (ko04626)	--	--	Protein kinase domain	Probable LRR receptor-like serine/threonine-protein kinase At5g37450 OS=Arabidopsis thaliana OX=3702 GN=At5g37450 PE=1 SV=1	T	Signal transduction mechanisms	LRR receptor-like serine/threonine-protein kinase [Actinidia chinensis var. chinensis]
gene-CEY00_Acc22389	364	392	364	184	144	243	4.85893	5.29647	4.53196	2.22549	1.91663	2.44221	1.45e-12	-1.02386	down	--	--	Cellular Component: integral component of membrane (GO:0016021);;	--	--	[R]	General function prediction only	CBS domain	Pentatricopeptide repeat-containing protein At5g10690 OS=Arabidopsis thaliana OX=3702 GN=CBSPPR1 PE=2 SV=1	S	Function unknown	Pentatricopeptide repeat-containing protein [Actinidia chinensis var. chinensis]
gene-CEY00_Acc13602	4	2	6	64	60	72	0.137277	0.076103	0.205582	2.17039	2.22306	2.03444	7.1e-16	2.10391	up	--	--	--	--	--	--	--	--	--	--	--	Protein TonB like [Actinidia chinensis var. chinensis]
gene-CEY00_Acc15794	28	30	20	82	57	100	0.705544	0.765429	0.455036	1.88993	1.43432	1.92189	1.81e-05	1.07034	up	[C]	Energy production and conversion	Molecular Function: L-lactate dehydrogenase activity (GO:0004459);; Cellular Component: cytoplasm (GO:0005737);; Biological Process: carbohydrate metabolic process (GO:0005975);; Biological Process: carboxylic acid metabolic process (GO:0019752);;	K00016|1.1e-174|zju:107418882|K00016 L-lactate dehydrogenase [EC:1.1.1.27] | (RefSeq) L-lactate dehydrogenase B	Glycolysis / Gluconeogenesis (ko00010);; Cysteine and methionine metabolism (ko00270);; Pyruvate metabolism (ko00620);; Propanoate metabolism (ko00640)	[C]	Energy production and conversion	lactate/malate dehydrogenase, NAD binding domain	L-lactate dehydrogenase A OS=Hordeum vulgare OX=4513 PE=1 SV=1	C	Energy production and conversion	L-lactate dehydrogenase [Actinidia chinensis var. chinensis]
gene-CEY00_Acc27162	28	27	19	111	133	137	1.24676	1.18725	0.757849	4.5112	5.91614	4.63183	1.94e-14	1.71766	up	--	--	Molecular Function: protein phosphatase inhibitor activity (GO:0004864);; Biological Process: defense response (GO:0006952);; Biological Process: abscisic acid-activated signaling pathway (GO:0009738);; Molecular Function: abscisic acid binding (GO:0010427);; Molecular Function: signaling receptor activity (GO:0038023);;	K05387|3.2e-09|peq:110030824|K05387 glutamate receptor, ionotropic, plant | (RefSeq) LOW QUALITY PROTEIN: glutamate receptor 2.3-like	--	--	--	Pathogenesis-related protein Bet v 1 family	Major allergen Pru ar 1 OS=Prunus armeniaca OX=36596 PE=1 SV=1	S	Function unknown	Major allergen Pru ar like [Actinidia chinensis var. chinensis]
gene-CEY00_Acc04712	300	253	256	151	101	112	7.73292	6.62152	6.16195	3.55262	2.58883	2.18516	5.7e-10	-1.1096	down	--	--	Cellular Component: plasma membrane (GO:0005886);; Molecular Function: kinase activity (GO:0016301);; Molecular Function: kinase inhibitor activity (GO:0019210);;	K14499|4.4e-65|vvi:100243702|K14499 BRI1 kinase inhibitor 1 | (RefSeq) BRI1 kinase inhibitor 1	Plant hormone signal transduction (ko04075)	--	--	--	BRI1 kinase inhibitor 1 OS=Arabidopsis thaliana OX=3702 GN=BKI1 PE=1 SV=1	S	Function unknown	BRI1 kinase [Actinidia chinensis var. chinensis]
gene-CEY00_Acc30032	217	229	250	773	625	780	11.0619	11.8353	11.9043	35.8975	31.783	30.0349	1.75e-31	1.43474	up	--	--	Molecular Function: ligase activity (GO:0016874);;	K13206|9.6e-15|ghi:107902778|K13206 coiled-coil domain-containing protein 55 | (RefSeq) LOW QUALITY PROTEIN: nuclear speckle splicing regulatory protein 1	--	--	--	--	Protein GL2-INTERACTING REPRESSOR 2 OS=Arabidopsis thaliana OX=3702 GN=GIR2 PE=1 SV=1	--	--	Phenylalanine--tRNA ligase alpha subunit like [Actinidia chinensis var. chinensis]
gene-CEY00_Acc20199	862	796	894	1875	1705	2246	41.0799	38.3745	39.7532	81.3023	80.9306	80.7833	7.2e-33	1.03472	up	--	--	Molecular Function: structural constituent of ribosome (GO:0003735);; Cellular Component: ribosome (GO:0005840);; Biological Process: translation (GO:0006412);;	K02920|3.4e-50|nau:109239198|K02920 large subunit ribosomal protein L36e | (RefSeq) 60S ribosomal protein L36-2-like	Ribosome (ko03010)	[J]	Translation, ribosomal structure and biogenesis	Ribosomal protein L36e	60S ribosomal protein L36-2 OS=Arabidopsis thaliana OX=3702 GN=RPL36B PE=3 SV=1	J	Translation, ribosomal structure and biogenesis	60S ribosomal protein like [Actinidia chinensis var. chinensis]
gene-CEY00_Acc11884	320	324	369	178	101	115	9.3166	9.55868	10.024	4.69782	2.93218	2.52185	2.97e-12	-1.27704	down	[O]	Posttranslational modification, protein turnover, chaperones	Biological Process: response to acid chemical (GO:0001101);; Molecular Function: molecular_function (GO:0003674);; Molecular Function: catalytic activity (GO:0003824);; Molecular Function: thioredoxin-disulfide reductase activity (GO:0004791);; Cellular Component: cellular_component (GO:0005575);; Cellular Component: intracellular (GO:0005622);; Cellular Component: cell (GO:0005623);; Cellular Co…	K03671|1.6e-09|ppp:112284546|K03671 thioredoxin 1 | (RefSeq) thioredoxin H-type-like isoform X1	--	[O]	Posttranslational modification, protein turnover, chaperones	Thioredoxin	Thioredoxin-like protein CDSP32, chloroplastic OS=Arabidopsis thaliana OX=3702 GN=CDSP32 PE=1 SV=1	O	Posttranslational modification, protein turnover, chaperones	Thioredoxin-like protein [Actinidia chinensis var. chinensis]
gene-CEY00_Acc08023	45	27	37	109	93	95	2.04423	1.20747	1.53366	4.49028	4.18159	3.24005	1.63e-05	1.02324	up	--	--	Biological Process: response to auxin (GO:0009733);;	K14488|4.5e-39|jre:108981711|K14488 SAUR family protein | (RefSeq) auxin-induced protein 6B-like	Plant hormone signal transduction (ko04075)	--	--	Auxin responsive protein	--	S	Function unknown	Auxin-responsive protein [Actinidia chinensis var. chinensis]
gene-CEY00_Acc30973	117	91	114	448	356	500	1.67111	1.3147	1.52886	5.86466	5.09155	5.42819	3.6e-32	1.72623	up	[IQ]	Lipid transport and metabolism;; Secondary metabolites biosynthesis, transport and catabolism	Molecular Function: molecular_function (GO:0003674);; Molecular Function: catalytic activity (GO:0003824);; Biological Process: biological_process (GO:0008150);; Biological Process: response to radiation (GO:0009314);; Biological Process: response to light stimulus (GO:0009416);; Biological Process: response to abiotic stimulus (GO:0009628);; Biological Process: response to endogenous stimulus (G…	K14487|4.1e-299|pmum:103337167|K14487 auxin responsive GH3 gene family | (RefSeq) probable indole-3-acetic acid-amido synthetase GH3.1	Plant hormone signal transduction (ko04075)	--	--	GH3 auxin-responsive promoter	Probable indole-3-acetic acid-amido synthetase GH3.1 OS=Arabidopsis thaliana OX=3702 GN=GH3.1 PE=2 SV=1	S	Function unknown	Indole-3-acetic acid-amido synthetase [Actinidia chinensis var. chinensis]
Actinidia_chinensis_newGene_5607	37	30	46	125	97	131	0.638727	0.690093	0.913298	1.98984	1.69376	1.73163	3.44e-08	1.21198	up	[T]	Signal transduction mechanisms	Molecular Function: protein kinase activity (GO:0004672);; Molecular Function: ATP binding (GO:0005524);;	K01534|7.7e-89|var:108330779|K01534 Zn2+/Cd2+-exporting ATPase [EC:7.2.2.12 7.2.2.21] | (RefSeq) cadmium/zinc-transporting ATPase HMA3-like	--	[T]	Signal transduction mechanisms	Protein kinase domain	Receptor-like cytosolic serine/threonine-protein kinase RBK1 OS=Arabidopsis thaliana OX=3702 GN=RBK1 PE=1 SV=1	T	Signal transduction mechanisms	Receptor-like serine/threonine-protein kinase [Actinidia chinensis var. chinensis]
gene-CEY00_Acc13889	35	38	41	101	87	122	1.04597	1.15668	1.15897	2.814	2.63794	2.80622	2.41e-06	1.04989	up	--	--	Molecular Function: transcription factor activity, sequence-specific DNA binding (GO:0003700);;	--	--	--	--	TCP family transcription factor	Transcription factor TCP4 OS=Arabidopsis thaliana OX=3702 GN=TCP4 PE=1 SV=1	K	Transcription	Transcription factor like [Actinidia chinensis var. chinensis]
gene-CEY00_Acc04777	52	45	48	150	127	134	1.57476	1.36253	1.33777	4.14247	3.83167	3.05149	4.98e-08	1.14244	up	--	--	--	--	--	[R]	General function prediction only	C2H2-type zinc finger	Zinc finger protein ZAT6 OS=Arabidopsis thaliana OX=3702 GN=ZAT6 PE=2 SV=1	S	Function unknown	Zinc finger protein [Actinidia chinensis var. chinensis]
gene-CEY00_Acc09988	0	0	0	47	41	42	0	0	0	1.29254	1.23732	0.963357	2.12e-14	2.0475	up	--	--	Molecular Function: transcription factor activity, sequence-specific DNA binding (GO:0003700);; Cellular Component: nucleus (GO:0005634);; Molecular Function: sequence-specific DNA binding (GO:0043565);;	K13424|4.5e-17|csat:104768914|K13424 WRKY transcription factor 33 | (RefSeq) probable WRKY transcription factor 26 isoform X1	MAPK signaling pathway - plant (ko04016);; Plant-pathogen interaction (ko04626)	--	--	WRKY DNA -binding domain	Probable WRKY transcription factor 40 OS=Arabidopsis thaliana OX=3702 GN=WRKY40 PE=1 SV=1	K	Transcription	WRKY transcription factor 40 [Actinidia chinensis var. chinensis]
gene-CEY00_Acc23128	46	18	25	119	175	193	1.04286	0.409528	0.525948	2.4858	4.00827	3.34773	1.87e-13	1.72053	up	--	--	Molecular Function: hydrolase activity, hydrolyzing O-glycosyl compounds (GO:0004553);; Biological Process: carbohydrate metabolic process (GO:0005975);;	K19893|5.3e-57|ath:AT5G58090|K19893 glucan endo-1,3-beta-glucosidase 5/6 [EC:3.2.1.39] | (RefSeq) O-Glycosyl hydrolases family 17 protein	Starch and sucrose metabolism (ko00500)	--	--	Glycosyl hydrolases family 17	Glucan endo-1,3-beta-glucosidase, acidic isoform PR-Q' OS=Nicotiana tabacum OX=4097 PE=1 SV=1	G	Carbohydrate transport and metabolism	Glucan endo-1,3-beta-glucosidase [Actinidia chinensis var. chinensis]
gene-CEY00_Acc04900	303	360	398	2723	1347	1593	7.99358	9.61168	9.79948	65.3843	35.4005	31.7278	5.13e-09	1.51262	up	--	--	--	K00020|7.4e-21|mtr:MTR_8g088900|K00020 3-hydroxyisobutyrate dehydrogenase [EC:1.1.1.31] | (RefSeq) 6-phosphogluconate dehydrogenase-like protein	Valine, leucine and isoleucine degradation (ko00280)	--	--	Phosphate-induced protein 1 conserved region	Protein PHOSPHATE-INDUCED 1 OS=Nicotiana tabacum OX=4097 GN=PHI-1 PE=2 SV=1	L	Replication, recombination and repair	Protein EXORDIUM like [Actinidia chinensis var. chinensis]
gene-CEY00_Acc06918	36	32	38	151	135	135	1.32066	1.20785	1.29689	5.12251	5.02131	3.78869	1.25e-12	1.50862	up	--	--	Molecular Function: peptidase activity (GO:0008233);;	--	--	--	--	Peptidase of plants and bacteria	Basic secretory protease (Fragments) OS=Boswellia serrata OX=613112 PE=1 SV=1	S	Function unknown	Basic secretory protease [Actinidia chinensis var. chinensis]
gene-CEY00_Acc07000	90	65	106	32	35	47	7.97257	5.8301	8.7665	2.51743	3.04669	3.15233	2.4e-05	-1.00858	down	--	--	--	--	--	--	--	--	--	--	--	Coiled-coil domain-containing protein [Actinidia chinensis var. chinensis]
gene-CEY00_Acc03651	26	18	21	91	56	102	0.677795	0.451547	0.512686	2.16141	1.45219	2.00908	2.3e-07	1.28325	up	--	--	Molecular Function: peroxidase activity (GO:0004601);; Cellular Component: extracellular region (GO:0005576);; Biological Process: response to oxidative stress (GO:0006979);; Molecular Function: heme binding (GO:0020037);; Biological Process: hydrogen peroxide catabolic process (GO:0042744);; Molecular Function: metal ion binding (GO:0046872);;	K00430|3.8e-150|dzi:111296160|K00430 peroxidase [EC:1.11.1.7] | (RefSeq) peroxidase P7-like	Phenylpropanoid biosynthesis (ko00940)	--	--	Peroxidase	Peroxidase 4 OS=Vitis vinifera OX=29760 GN=GSVIVT00023967001 PE=1 SV=1	Q	Secondary metabolites biosynthesis, transport and catabolism	Peroxidase [Actinidia chinensis var. chinensis]
gene-CEY00_Acc10420	41	77	89	281	188	317	0.827832	1.58958	1.70598	5.25657	3.852	4.91564	5.82e-13	1.47216	up	--	--	--	--	--	--	--	Domain of unknown function (DUF702)	Protein SHORT INTERNODES OS=Arabidopsis thaliana OX=3702 GN=SHI PE=1 SV=1	S	Function unknown	Protein SHI RELATED SEQUENCE like [Actinidia chinensis var. chinensis]
gene-CEY00_Acc17322	149	110	156	403	293	318	5.32207	3.98222	5.20187	13.1609	10.4727	8.60514	6.21e-09	1.03686	up	--	--	Biological Process: response to acid chemical (GO:0001101);; Cellular Component: cellular_component (GO:0005575);; Cellular Component: cell wall (GO:0005618);; Cellular Component: cell (GO:0005623);; Cellular Component: plasma membrane (GO:0005886);; Cellular Component: cell-cell junction (GO:0005911);; Biological Process: biological_process (GO:0008150);; Cellular Component: plant-type cell wall…	--	--	--	--	Pollen protein Ole e 1 like	Non-classical arabinogalactan protein 30 OS=Arabidopsis thaliana OX=3702 GN=AGP30 PE=2 SV=1	S	Function unknown	Non-classical arabinogalactan protein [Actinidia chinensis var. chinensis]
gene-CEY00_Acc16933	95	103	106	22	24	36	3.98253	4.37963	4.1576	0.832963	0.999485	1.14989	2.99e-12	-1.56259	down	--	--	Biological Process: blue light signaling pathway (GO:0009785);;	K01166|9.9e-15|dzi:111302682|K01166 ribonuclease T2 [EC:4.6.1.19] | (RefSeq) uncharacterized protein LOC111302682	--	--	--	--	Protein BIC1 OS=Arabidopsis thaliana OX=3702 GN=BIC1 PE=1 SV=1	--	--	Mucin-17 like [Actinidia chinensis var. chinensis]
gene-CEY00_Acc19799	644	585	643	135	231	316	37.4415	34.4016	34.9102	7.09476	13.3828	13.8634	7.08e-16	-1.40119	down	--	--	--	--	--	--	--	--	--	S	Function unknown	Protein DETOXIFICATION like [Actinidia chinensis var. chinensis]
gene-CEY00_Acc06581	40	61	61	170	150	194	0.871552	1.32833	1.23864	3.36281	3.25527	3.19465	6.1e-11	1.29364	up	[IR]	Lipid transport and metabolism;; General function prediction only	Molecular Function: hydrolase activity, acting on ester bonds (GO:0016788);;	--	--	--	--	GDSL-like Lipase/Acylhydrolase	Acetylajmalan esterase OS=Rauvolfia serpentina OX=4060 GN=AAE PE=1 SV=1	S	Function unknown	Acetylajmalan esterase [Actinidia chinensis var. chinensis]
gene-CEY00_Acc15991	269	254	250	733	670	931	4.79034	4.56873	4.15135	11.8694	11.8894	12.5172	1.6e-34	1.39024	up	[G]	Carbohydrate transport and metabolism	Cellular Component: integral component of membrane (GO:0016021);; Molecular Function: transmembrane transporter activity (GO:0022857);;	K12818|4.0e-79|smo:SELMODRAFT_429199|K12818 ATP-dependent RNA helicase DHX8/PRP22 [EC:3.6.4.13] | (RefSeq) hypothetical protein	Spliceosome (ko03040)	[R]	General function prediction only	Major Facilitator Superfamily	Protein ZINC INDUCED FACILITATOR-LIKE 1 OS=Arabidopsis thaliana OX=3702 GN=ZIFL1 PE=2 SV=1	J	Translation, ribosomal structure and biogenesis	Protein ZINC INDUCED FACILITATOR-LIKE like [Actinidia chinensis var. chinensis]
gene-CEY00_Acc20346	110	102	88	252	201	273	2.81419	2.62942	2.0997	5.8525	5.12598	5.27113	2.28e-09	1.02028	up	--	--	Molecular Function: ATP binding (GO:0005524);; Cellular Component: nucleus (GO:0005634);; Biological Process: transcription, DNA-templated (GO:0006351);; Biological Process: regulation of transcription, DNA-templated (GO:0006355);; Biological Process: developmental process (GO:0032502);;	K22382|3.2e-11|oeu:111408549|K22382 WD repeat-containing protein 26 | (RefSeq) WD repeat-containing protein 26 homolog	--	--	--	WRC	Growth-regulating factor 4 OS=Oryza sativa subsp. japonica OX=39947 GN=GRF4 PE=1 SV=1	K	Transcription	Growth-regulating factor like [Actinidia chinensis var. chinensis]
gene-CEY00_Acc09392	17	13	5	73	50	67	0.275175	0.208346	0.06158	1.08073	0.803216	0.822854	1.43e-07	1.40474	up	[E]	Amino acid transport and metabolism	Cellular Component: integral component of membrane (GO:0016021);; Molecular Function: transmembrane transporter activity (GO:0022857);;	K14638|1.0e-281|nta:107763750|K14638 solute carrier family 15 (peptide/histidine transporter), member 3/4 | (RefSeq) protein NRT1/ PTR FAMILY 7.3-like	--	[E]	Amino acid transport and metabolism	POT family	Protein NRT1/ PTR FAMILY 7.3 OS=Arabidopsis thaliana OX=3702 GN=NPF7.3 PE=1 SV=2	E	Amino acid transport and metabolism	Protein NRT1/ PTR FAMILY 7.3 like [Actinidia chinensis var. chinensis]
gene-CEY00_Acc04571	43	29	32	120	92	99	1.07438	0.73406	0.730136	2.71897	2.29621	1.86424	1.62e-06	1.12446	up	[QV]	Secondary metabolites biosynthesis, transport and catabolism;; Defense mechanisms	Molecular Function: monooxygenase activity (GO:0004497);; Molecular Function: iron ion binding (GO:0005506);; Molecular Function: oxidoreductase activity, acting on paired donors, with incorporation or reduction of molecular oxygen (GO:0016705);; Molecular Function: heme binding (GO:0020037);;	K20617|7.0e-110|lja:Lj3g3v1475790.2|K20617 cytochrome P450 family 71 subfamily A | (RefSeq) Lj3g3v1475790.2; -	--	[Q]	Secondary metabolites biosynthesis, transport and catabolism	Cytochrome P450	Cytochrome P450 83B1 OS=Arabidopsis thaliana OX=3702 GN=CYP83B1 PE=1 SV=1	Q	Secondary metabolites biosynthesis, transport and catabolism	Cytochrome P450 83B1 like [Actinidia chinensis var. chinensis]
gene-CEY00_Acc20731	24	14	13	71	57	99	0.320877	0.183116	0.159484	0.877617	0.768124	1.01756	8.05e-08	1.36653	up	[O]	Posttranslational modification, protein turnover, chaperones	Molecular Function: serine-type endopeptidase activity (GO:0004252);;	K15333|1.5e-72|nsy:104224633|K15333 tRNA guanosine-2'-O-methyltransferase [EC:2.1.1.34] | (RefSeq) uncharacterized protein LOC104224633	--	--	--	Subtilase family	Subtilisin-like protease SBT5.6 OS=Arabidopsis thaliana OX=3702 GN=SBT5.6 PE=2 SV=1	G	Carbohydrate transport and metabolism	Subtilisin-like protease [Actinidia chinensis var. chinensis]
gene-CEY00_Acc06537	131	130	123	374	248	336	2.33129	2.33758	2.04043	6.05525	4.40376	4.5167	1.68e-10	1.0675	up	[C]	Energy production and conversion	Molecular Function: oxidoreductase activity (GO:0016491);; Molecular Function: FAD binding (GO:0071949);;	K22395|9.3e-170|nsy:104229604|K22395 cinnamyl-alcohol dehydrogenase [EC:1.1.1.195] | (RefSeq) reticuline oxidase-like protein	Phenylpropanoid biosynthesis (ko00940)	--	--	FAD binding domain	Berberine bridge enzyme-like 8 OS=Arabidopsis thaliana OX=3702 GN=At1g30700 PE=2 SV=1	C	Energy production and conversion	Berberine bridge enzyme-like [Actinidia chinensis var. chinensis]
Actinidia_chinensis_newGene_454	72	77	53	27	16	25	0.947679	1.03062	0.657179	0.326753	0.201549	0.25016	3.21e-06	-1.18779	down	--	--	Biological Process: malate transport (GO:0015743);; Cellular Component: integral component of membrane (GO:0016021);;	--	--	[R]	General function prediction only	Aluminium activated malate transporter	Aluminum-activated malate transporter 13 OS=Arabidopsis thaliana OX=3702 GN=ALMT13 PE=2 SV=1	S	Function unknown	Aluminum-activated malate transporter like [Actinidia chinensis var. chinensis]
gene-CEY00_Acc10358	3873	4035	4015	1958	1780	2453	54.7764	57.7796	53.0056	25.2024	25.0851	26.1959	7.99e-41	-1.05052	down	[J]	Translation, ribosomal structure and biogenesis	Cellular Component: integral component of membrane (GO:0016021);; Molecular Function: hydrolase activity (GO:0016787);;	K02433|1.2e-51|psom:113275959|K02433 aspartyl-tRNA(Asn)/glutamyl-tRNA(Gln) amidotransferase subunit A [EC:6.3.5.6 6.3.5.7] | (RefSeq) glutamyl-tRNA(Gln) amidotransferase subunit A, chloroplastic/mitochondrial-like	Aminoacyl-tRNA biosynthesis (ko00970)	[J]	Translation, ribosomal structure and biogenesis	Amidase	Fatty acid amide hydrolase OS=Arabidopsis thaliana OX=3702 GN=FAAH PE=1 SV=1	J	Translation, ribosomal structure and biogenesis	Fatty acid amide hydrolase [Actinidia chinensis var. chinensis]
Actinidia_chinensis_newGene_9085	16	14	32	61	79	85	0.965133	0.849421	1.94513	3.72942	4.86289	4.38844	5.66e-06	1.18153	up	--	--	--	--	--	--	--	--	--	--	--	PREDICTED: uncharacterized protein LOC100248142 [Vitis vinifera]
gene-CEY00_Acc01842	207	135	155	40	49	46	9.47616	6.24611	6.62033	1.65275	2.20397	1.5687	9.85e-15	-1.61438	down	--	--	--	--	--	--	--	Wound-induced protein WI12	--	S	Function unknown	Wound-induced protein [Actinidia chinensis var. chinensis]
gene-CEY00_Acc29760	2988	2526	2484	17301	13267	17166	75.4859	64.6114	58.5745	397.821	334.038	327.458	2.11e-119	2.3526	up	--	--	Molecular Function: RNA binding (GO:0003723);; Molecular Function: ribonuclease T2 activity (GO:0033897);;	K01166|1.3e-29|nsy:104248071|K01166 ribonuclease T2 [EC:4.6.1.19] | (RefSeq) ribonuclease 3-like	--	--	--	Ribonuclease T2 family	--	A	RNA processing and modification	Extracellular ribonuclease [Actinidia chinensis var. chinensis]
gene-CEY00_Acc32723	2	0	4	123	182	130	0.04134	0	0.14248	4.49342	7.2973	3.94895	3.07e-36	3.12657	up	--	--	Molecular Function: transcription factor activity, sequence-specific DNA binding (GO:0003700);; Cellular Component: nucleus (GO:0005634);; Molecular Function: sequence-specific DNA binding (GO:0043565);;	K12835|7.6e-25|cmax:111493042|K12835 ATP-dependent RNA helicase DDX42 [EC:3.6.4.13] | (RefSeq) DEAD-box ATP-dependent RNA helicase 24 isoform X1	Spliceosome (ko03040)	--	--	WRKY DNA -binding domain	Probable WRKY transcription factor 75 OS=Arabidopsis thaliana OX=3702 GN=WRKY75 PE=1 SV=1	K	Transcription	WRKY transcription factor [Actinidia chinensis var. chinensis]
gene-CEY00_Acc33095	89	106	109	708	631	719	2.93604	3.54486	3.38134	21.463	20.9391	18.0771	7.01e-70	2.43196	up	--	--	--	--	--	--	--	Pollen protein Ole e 1 like	Phylloplanin OS=Nicotiana tabacum OX=4097 PE=1 SV=1	S	Function unknown	Phylloplanin like [Actinidia chinensis var. chinensis]
gene-CEY00_Acc04949	63	106	154	732	369	448	0.988896	1.6933	2.27816	10.5576	5.83406	5.36313	5.83e-05	1.13686	up	[DPM]	Cell cycle control, cell division, chromosome partitioning;; Inorganic ion transport and metabolism;; Cell wall/membrane/envelope biogenesis	Molecular Function: copper ion binding (GO:0005507);; Biological Process: lignin catabolic process (GO:0046274);; Cellular Component: apoplast (GO:0048046);; Molecular Function: hydroquinone:oxygen oxidoreductase activity (GO:0052716);;	K05909|4.7e-244|egr:104421624|K05909 laccase [EC:1.10.3.2] | (RefSeq) laccase-15	--	[Q]	Secondary metabolites biosynthesis, transport and catabolism	Multicopper oxidase	Laccase-15 OS=Arabidopsis thaliana OX=3702 GN=TT10 PE=1 SV=1	Q	Secondary metabolites biosynthesis, transport and catabolism	Laccase-15 like [Actinidia chinensis var. chinensis]
gene-CEY00_Acc15625	27	38	46	804	429	411	1.11198	1.60971	1.81752	31.0249	18.1359	13.1457	2.24e-15	2.0899	up	--	--	Cellular Component: apoplast (GO:0048046);;	K19027|2.7e-23|smo:SELMODRAFT_443317|K19027 zinc finger FYVE domain-containing protein 26 | (RefSeq) hypothetical protein	--	--	--	Dirigent-like protein	Disease resistance response protein 206 OS=Pisum sativum OX=3888 GN=PI206 PE=1 SV=2	S	Function unknown	Disease resistance response protein [Actinidia chinensis var. chinensis]
gene-CEY00_Acc09801	61	68	82	306	201	282	2.15231	2.42667	2.69357	9.84637	7.08347	7.51628	3.61e-17	1.53461	up	--	--	Biological Process: reproduction (GO:0000003);; Biological Process: response to acid chemical (GO:0001101);; Biological Process: developmental process involved in reproduction (GO:0003006);; Molecular Function: molecular_function (GO:0003674);; Molecular Function: transcription cofactor activity (GO:0003712);; Molecular Function: transcription corepressor activity (GO:0003714);; Cellular Componen…	K13464|3.2e-56|vvi:100254231|K13464 jasmonate ZIM domain-containing protein | (RefSeq) protein TIFY 10A	Plant hormone signal transduction (ko04075)	--	--	tify domain	Protein TIFY 10A OS=Arabidopsis thaliana OX=3702 GN=TIFY10A PE=1 SV=1	S	Function unknown	Protein TIFY 10A like [Actinidia chinensis var. chinensis]
gene-CEY00_Acc29759	43	53	67	15	26	16	2.08941	2.6421	3.04966	0.629965	1.26373	0.56362	0.000155887	-1.0314	down	--	--	Molecular Function: RNA binding (GO:0003723);; Cellular Component: integral component of membrane (GO:0016021);; Molecular Function: ribonuclease T2 activity (GO:0033897);;	K01166|1.8e-06|adu:107489782|K01166 ribonuclease T2 [EC:4.6.1.19] | (RefSeq) ribonuclease S-7-like	--	--	--	Ribonuclease T2 family	--	--	--	Ribonuclease [Actinidia chinensis var. chinensis]
gene-CEY00_Acc08308	68	60	49	216	125	189	1.3417	1.20497	0.897282	3.91504	2.47289	2.84029	1.53e-08	1.18979	up	--	--	Molecular Function: DNA binding (GO:0003677);; Molecular Function: transcription factor activity, sequence-specific DNA binding (GO:0003700);; Cellular Component: nucleus (GO:0005634);;	K12900|2.0e-28|lang:109341833|K12900 FUS-interacting serine-arginine-rich protein 1 | (RefSeq) serine/arginine-rich SC35-like splicing factor SCL30A	Spliceosome (ko03040)	--	--	AP2 domain	Ethylene-responsive transcription factor ERF113 OS=Arabidopsis thaliana OX=3702 GN=ERF113 PE=2 SV=1	K	Transcription	Ethylene-responsive transcription factor [Actinidia chinensis var. chinensis]
Actinidia_chinensis_newGene_1337	17	21	21	87	61	94	0.188489	0.2372	0.21835	0.901337	0.688095	0.808618	2.56e-08	1.36462	up	[ET]	Amino acid transport and metabolism;; Signal transduction mechanisms	Molecular Function: ligand-gated ion channel activity (GO:0015276);; Cellular Component: integral component of membrane (GO:0016021);;	K05387|3.9e-309|nto:104114796|K05387 glutamate receptor, ionotropic, plant | (RefSeq) glutamate receptor 2.1-like	--	[PET]	Inorganic ion transport and metabolism;; Amino acid transport and metabolism;; Signal transduction mechanisms	Receptor family ligand binding region	Glutamate receptor 2.7 OS=Arabidopsis thaliana OX=3702 GN=GLR2.7 PE=2 SV=3	P	Inorganic ion transport and metabolism	Glutamate receptor 2.7 like [Actinidia chinensis var. chinensis]
gene-CEY00_Acc05844	107	90	93	32	38	50	7.52593	6.41212	6.05392	2.03045	2.64329	2.64208	7.65e-07	-1.11019	down	--	--	--	--	--	--	--	--	--	--	--	Glucose-repressible alcohol dehydrogenase transcriptional effector like [Actinidia chinensis var. chinensis]
gene-CEY00_Acc11415	15	15	23	128	82	71	0.379096	0.371268	0.523435	2.94247	2.06523	1.34626	2e-09	1.53092	up	[I]	Lipid transport and metabolism	Molecular Function: hydrolase activity (GO:0016787);;	K14493|1.1e-62|boe:106306876|K14493 gibberellin receptor GID1 [EC:3.-.-.-] | (RefSeq) gibberellin receptor GID1C	Plant hormone signal transduction (ko04075)	[V]	Defense mechanisms	alpha/beta hydrolase fold	Probable carboxylesterase 18 OS=Arabidopsis thaliana OX=3702 GN=CXE18 PE=1 SV=1	V	Defense mechanisms	Carboxylesterase [Actinidia chinensis var. chinensis]
gene-CEY00_Acc21754	740	756	806	248	222	247	9.55215	9.88681	9.70819	2.90712	2.85591	2.40394	1.2e-47	-1.70194	down	[Q]	Secondary metabolites biosynthesis, transport and catabolism	Molecular Function: oxidoreductase activity, acting on single donors with incorporation of molecular oxygen, incorporation of two atoms of oxygen (GO:0016702);; Molecular Function: metal ion binding (GO:0046872);;	K09840|2.1e-258|dzi:111276007|K09840 9-cis-epoxycarotenoid dioxygenase [EC:1.13.11.51] | (RefSeq) 9-cis-epoxycarotenoid dioxygenase NCED3, chloroplastic-like	Carotenoid biosynthesis (ko00906)	[Q]	Secondary metabolites biosynthesis, transport and catabolism	Retinal pigment epithelial membrane protein	9-cis-epoxycarotenoid dioxygenase NCED1, chloroplastic OS=Solanum lycopersicum OX=4081 GN=NCED1 PE=1 SV=2	Q	Secondary metabolites biosynthesis, transport and catabolism	9-cis-epoxycarotenoid dioxygenase [Actinidia chinensis var. chinensis]
Actinidia_chinensis_newGene_3714	100	121	75	21	30	31	2.12562	2.14834	1.35152	0.239988	0.473055	0.564614	1.29e-09	-1.45013	down	--	--	Molecular Function: metal ion binding (GO:0046872);;	--	--	--	--	--	--	--	--	Bromodomain adjacent to zinc finger domain protein like [Actinidia chinensis var. chinensis]
gene-CEY00_Acc19213	61	67	47	6	15	24	2.67342	2.98767	1.92803	0.203771	0.650221	0.781757	1.54e-06	-1.29435	down	--	--	Molecular Function: DNA binding (GO:0003677);;	--	--	--	--	--	--	--	--	Activity-dependent neuroprotector homeobox protein [Actinidia chinensis var. chinensis]
gene-CEY00_Acc01022	8	10	7	37	32	42	0.257224	0.306024	0.212009	1.09426	1.02386	1.03278	8.75e-05	1.1058	up	[MDT]	Cell wall/membrane/envelope biogenesis;; Cell cycle control, cell division, chromosome partitioning;; Signal transduction mechanisms	Molecular Function: ATP binding (GO:0005524);;	K08900|1.6e-104|pmum:103340124|K08900 mitochondrial chaperone BCS1 | (RefSeq) protein HYPER-SENSITIVITY-RELATED 4-like	--	[O]	Posttranslational modification, protein turnover, chaperones	ATPase family associated with various cellular activities (AAA)	Protein HYPER-SENSITIVITY-RELATED 4 OS=Arabidopsis thaliana OX=3702 GN=HSR4 PE=2 SV=1	O	Posttranslational modification, protein turnover, chaperones	Protein HYPER-SENSITIVITY-RELATED like [Actinidia chinensis var. chinensis]
gene-CEY00_Acc16322	6541	6513	7060	2497	3092	4128	152.901	154.145	154.048	53.108	72.0237	72.848	3.57e-23	-1.12391	down	[CHR]	Energy production and conversion;; Coenzyme transport and metabolism;; General function prediction only	Molecular Function: oxidoreductase activity, acting on the CH-OH group of donors, NAD or NADP as acceptor (GO:0016616);; Molecular Function: NAD binding (GO:0051287);;	K15893|5.0e-213|zju:107427284|K15893 glycerate dehydrogenase [EC:1.1.1.29] | (RefSeq) glycerate dehydrogenase	Glycine, serine and threonine metabolism (ko00260);; Glyoxylate and dicarboxylate metabolism (ko00630);; Carbon metabolism (ko01200)	[C]	Energy production and conversion	D-isomer specific 2-hydroxyacid dehydrogenase, NAD binding domain	Glycerate dehydrogenase OS=Cucumis sativus OX=3659 GN=HPR-A PE=2 SV=1	C	Energy production and conversion	Glycerate dehydrogenase [Actinidia chinensis var. chinensis]
gene-CEY00_Acc02882	449	426	422	220	211	227	7.50466	7.20459	6.57806	3.3434	3.49904	2.86277	4.23e-14	-1.0214	down	--	--	Molecular Function: kinase activity (GO:0016301);;	--	--	--	--	PDDEXK-like family of unknown function	--	S	Function unknown	Signal transduction histidine-protein kinase [Actinidia chinensis var. chinensis]
Actinidia_chinensis_newGene_4723	102	137	89	28	25	64	1.20419	1.64005	0.984157	0.289887	0.293692	0.56387	6.44e-07	-1.21468	down	--	--	Cellular Component: integral component of membrane (GO:0016021);;	K15378|7.8e-47|oeu:111395605|K15378 solute carrier family 45, member 1/2/4 | (RefSeq) sucrose transport protein SUC3 isoform X1	--	[G]	Carbohydrate transport and metabolism	--	Sucrose transport protein SUC3 OS=Arabidopsis thaliana OX=3702 GN=SUC3 PE=1 SV=1	G	Carbohydrate transport and metabolism	sucrose transport protein [Actinidia chinensis]
gene-CEY00_Acc33345	57	54	43	134	106	172	0.799308	0.776337	0.559215	1.73287	1.50372	1.84167	4.87e-07	1.05631	up	--	--	Molecular Function: zinc ion binding (GO:0008270);;	K22733|5.3e-133|cit:102612526|K22733 magnesium transporter | (RefSeq) uncharacterized protein LOC102612526	--	[R]	General function prediction only	PPR repeat family	Pentatricopeptide repeat-containing protein At4g14850 OS=Arabidopsis thaliana OX=3702 GN=LOI1 PE=1 SV=1	S	Function unknown	Pentatricopeptide repeat-containing protein [Actinidia chinensis var. chinensis]
gene-CEY00_Acc08456	50	32	45	297	198	325	0.953107	0.622149	0.798463	5.18412	3.77479	4.71291	3.27e-30	2.15123	up	--	--	Molecular Function: UDP-glycosyltransferase activity (GO:0008194);;	K13496|3.8e-173|vvi:100248767|K13496 UDP-glucosyltransferase 73C [EC:2.4.1.-] | (RefSeq) UDP-glycosyltransferase 73C2	Zeatin biosynthesis (ko00908)	[GC]	Carbohydrate transport and metabolism;; Energy production and conversion	UDP-glucoronosyl and UDP-glucosyl transferase	UDP-glycosyltransferase 73C3 OS=Arabidopsis thaliana OX=3702 GN=UGT73C3 PE=2 SV=1	--	--	UDP-glycosyltransferase [Actinidia chinensis var. chinensis]
Actinidia_chinensis_newGene_7484	38	61	37	7	20	9	0.662764	1.08187	0.606035	0.107542	0.336852	0.10768	0.000138195	-1.0811	down	--	--	Molecular Function: ligand-gated ion channel activity (GO:0015276);; Cellular Component: integral component of membrane (GO:0016021);;	K05387|7.9e-21|qsu:112033130|K05387 glutamate receptor, ionotropic, plant | (RefSeq) glutamate receptor 3.2-like	--	[PET]	Inorganic ion transport and metabolism;; Amino acid transport and metabolism;; Signal transduction mechanisms	--	Glutamate receptor 3.3 OS=Arabidopsis thaliana OX=3702 GN=GLR3.3 PE=1 SV=1	--	--	Glutamate receptor 3.2 like [Actinidia chinensis var. chinensis]
gene-CEY00_Acc30144	8	14	11	101	75	89	0.282851	0.497229	0.343915	3.24819	2.63272	2.36352	9.79e-15	1.91725	up	--	--	--	--	--	--	--	--	Kiwellin OS=Actinidia chinensis var. chinensis OX=1590841 GN=KWL1 PE=1 SV=2	S	Function unknown	KiTH-2 like [Actinidia chinensis var. chinensis]
Actinidia_chinensis_newGene_3797	133	115	116	1309	742	1174	10.8626	9.46949	8.78973	97.4982	60.4797	72.5084	1.98e-68	2.7052	up	--	--	Molecular Function: RNA binding (GO:0003723);; Molecular Function: ribonuclease T2 activity (GO:0033897);;	K01166|2.7e-13|nsy:104248071|K01166 ribonuclease T2 [EC:4.6.1.19] | (RefSeq) ribonuclease 3-like	--	--	--	Ribonuclease T2 family	--	S	Function unknown	Extracellular ribonuclease like [Actinidia chinensis var. chinensis]
gene-CEY00_Acc01612	164	128	160	50	52	67	7.13683	5.65462	6.52935	1.96739	2.24213	2.20312	2.65e-11	-1.30325	down	--	--	Molecular Function: fatty acid binding (GO:0005504);; Biological Process: systemic acquired resistance (GO:0009627);;	--	--	--	--	Probable lipid transfer	--	S	Function unknown	Non-specific lipid-transfer protein 2precursor [Actinidia chinensis var. chinensis]
gene-CEY00_Acc22180	67	68	79	172	193	226	1.73333	1.79794	1.91162	4.08981	5.01975	4.4581	1.76e-10	1.16729	up	--	--	--	K03097|1.3e-08|aip:107632886|K03097 casein kinase II subunit alpha [EC:2.7.11.1] | (RefSeq) casein kinase II subunit alpha-like isoform X3	Ribosome biogenesis in eukaryotes (ko03008);; Circadian rhythm - plant (ko04712)	--	--	Protein of unknown function (DUF642)	--	S	Function unknown	Allergen Act d like [Actinidia chinensis var. chinensis]
gene-CEY00_Acc20976	270	287	322	809	788	760	5.17837	5.55504	5.75589	14.1194	15.0519	11.0036	2.2e-19	1.22347	up	[QV]	Secondary metabolites biosynthesis, transport and catabolism;; Defense mechanisms	Molecular Function: monooxygenase activity (GO:0004497);; Molecular Function: iron ion binding (GO:0005506);; Molecular Function: oxidoreductase activity, acting on paired donors, with incorporation or reduction of molecular oxygen (GO:0016705);; Molecular Function: heme binding (GO:0020037);;	K20667|5.1e-215|sind:105175834|K20667 beta-amyrin 28-monooxygenase [EC:1.14.14.126] | (RefSeq) beta-amyrin 28-oxidase	--	[QI]	Secondary metabolites biosynthesis, transport and catabolism;; Lipid transport and metabolism	Cytochrome P450	Beta-amyrin 28-monooxygenase OS=Medicago truncatula OX=3880 GN=CYP716A12 PE=1 SV=1	Q	Secondary metabolites biosynthesis, transport and catabolism	Beta-amyrin 28-oxidase [Actinidia chinensis var. chinensis]
gene-CEY00_Acc30960	53	63	51	203	131	173	1.43351	1.72181	1.27162	5.01562	3.53591	3.53816	3e-09	1.22187	up	--	--	Molecular Function: peroxidase activity (GO:0004601);; Cellular Component: extracellular region (GO:0005576);; Biological Process: response to oxidative stress (GO:0006979);; Molecular Function: heme binding (GO:0020037);; Biological Process: hydrogen peroxide catabolic process (GO:0042744);; Molecular Function: metal ion binding (GO:0046872);;	K00430|1.3e-142|egr:104418455|K00430 peroxidase [EC:1.11.1.7] | (RefSeq) peroxidase 73	Phenylpropanoid biosynthesis (ko00940)	--	--	Peroxidase	Peroxidase 51 OS=Arabidopsis thaliana OX=3702 GN=PER51 PE=2 SV=1	Q	Secondary metabolites biosynthesis, transport and catabolism	Peroxidase [Actinidia chinensis var. chinensis]
gene-CEY00_Acc10550	219	189	187	100	66	79	3.42601	2.99974	2.73328	1.41574	1.01831	0.93089	1.63e-10	-1.20253	down	--	--	Biological Process: reproduction (GO:0000003);; Biological Process: regionalization (GO:0003002);; Biological Process: developmental process involved in reproduction (GO:0003006);; Molecular Function: protein binding (GO:0005515);; Biological Process: multicellular organism development (GO:0007275);; Biological Process: pattern specification process (GO:0007389);; Biological Process: biological_p…	--	--	--	--	NPH3 family	BTB/POZ domain-containing protein DOT3 OS=Arabidopsis thaliana OX=3702 GN=DOT3 PE=2 SV=1	S	Function unknown	BTB/POZ domain-containing protein [Actinidia chinensis var. chinensis]
gene-CEY00_Acc09901	10	21	7	141	146	182	0.246319	0.567391	0.170323	3.42212	3.87507	3.68167	2.9e-28	2.51194	up	[F]	Nucleotide transport and metabolism	Molecular Function: catalytic activity (GO:0003824);; Biological Process: nucleoside metabolic process (GO:0009116);;	K07870|1.5e-19|pxb:103958384|K07870 mitochondrial Rho GTPase 1 [EC:3.6.5.-] | (RefSeq) uncharacterized protein LOC103958384	--	--	--	Phosphorylase superfamily	--	F	Nucleotide transport and metabolism	Bark storage protein like [Actinidia chinensis var. chinensis]
gene-CEY00_Acc06345	178	181	177	80	42	73	3.52339	3.61266	3.25798	1.43076	0.816108	1.08112	4.52e-12	-1.34475	down	--	--	Molecular Function: DNA binding (GO:0003677);; Cellular Component: nucleus (GO:0005634);; Biological Process: regulation of transcription, DNA-templated (GO:0006355);;	K16222|9.7e-56|csat:104726841|K16222 Dof zinc finger protein DOF5.5 | (RefSeq) cyclic dof factor 1-like	Circadian rhythm - plant (ko04712)	--	--	Dof domain, zinc finger	Cyclic dof factor 2 OS=Arabidopsis thaliana OX=3702 GN=CDF2 PE=1 SV=2	K	Transcription	Cyclic dof factor like [Actinidia chinensis var. chinensis]
gene-CEY00_Acc23374	831	930	948	2532	1822	2288	16.1293	18.28	17.1847	44.7443	35.2541	33.5494	2.49e-21	1.11294	up	--	--	Molecular Function: ATP binding (GO:0005524);; Cellular Component: nucleus (GO:0005634);; Biological Process: transcription, DNA-templated (GO:0006351);; Biological Process: regulation of transcription, DNA-templated (GO:0006355);; Biological Process: developmental process (GO:0032502);;	K22382|4.2e-11|oeu:111408549|K22382 WD repeat-containing protein 26 | (RefSeq) WD repeat-containing protein 26 homolog	--	--	--	WRC	Growth-regulating factor 3 OS=Oryza sativa subsp. japonica OX=39947 GN=GRF3 PE=3 SV=2	K	Transcription	Growth-regulating factor like [Actinidia chinensis var. chinensis]
gene-CEY00_Acc23145	50	42	47	197	206	215	1.42421	1.21268	1.23554	5.13796	5.86654	4.63982	4.97e-20	1.72757	up	--	--	Molecular Function: transcription factor activity, sequence-specific DNA binding (GO:0003700);; Cellular Component: nucleus (GO:0005634);; Cellular Component: host cell nucleus (GO:0042025);; Molecular Function: sequence-specific DNA binding (GO:0043565);;	K09419|8.3e-94|qsu:112013936|K09419 heat shock transcription factor, other eukaryote | (RefSeq) heat stress transcription factor B-3-like isoform X1	--	[K]	Transcription	HSF-type DNA-binding	Heat stress transcription factor B-3 OS=Arabidopsis thaliana OX=3702 GN=HSFB3 PE=1 SV=1	K	Transcription	Heat stress transcription factor B-3 like [Actinidia chinensis var. chinensis]
gene-CEY00_Acc11285	5	16	14	114	100	132	0.071695	0.248566	0.191435	1.59191	1.53828	1.53445	2.09e-20	2.20014	up	[H]	Coenzyme transport and metabolism	Biological Process: biological_process (GO:0008150);; Biological Process: response to radiation (GO:0009314);; Biological Process: response to light stimulus (GO:0009416);; Biological Process: response to abiotic stimulus (GO:0009628);; Biological Process: response to endogenous stimulus (GO:0009719);; Biological Process: response to hormone (GO:0009725);; Biological Process: response to auxin (G…	K14487|1.3e-308|sind:105169490|K14487 auxin responsive GH3 gene family | (RefSeq) probable indole-3-acetic acid-amido synthetase GH3.1	Plant hormone signal transduction (ko04075)	--	--	GH3 auxin-responsive promoter	Probable indole-3-acetic acid-amido synthetase GH3.1 OS=Arabidopsis thaliana OX=3702 GN=GH3.1 PE=2 SV=1	S	Function unknown	Indole-3-acetic acid-amido synthetase [Actinidia chinensis var. chinensis]
gene-CEY00_Acc19295	1720	1714	1988	700	841	1156	56.0302	56.5391	60.4745	20.7447	27.2961	28.4199	2.96e-19	-1.07786	down	--	--	Cellular Component: photosystem I (GO:0009522);; Biological Process: photosynthesis (GO:0015979);; Cellular Component: integral component of membrane (GO:0016021);;	K08905|9.1e-59|sly:101263732|K08905 photosystem I subunit V | (RefSeq) photosystem I reaction center subunit V, chloroplastic	Photosynthesis (ko00195)	--	--	Photosystem I psaG / psaK	Photosystem I reaction center subunit V, chloroplastic OS=Arabidopsis thaliana OX=3702 GN=PSAG PE=1 SV=1	S	Function unknown	Photosystem I reaction center subunit V like [Actinidia chinensis var. chinensis]
gene-CEY00_Acc28299	105	86	135	268	237	317	1.79887	1.49535	2.16675	4.19171	4.06524	4.11472	2.02e-10	1.07767	up	[QV]	Secondary metabolites biosynthesis, transport and catabolism;; Defense mechanisms	Molecular Function: monooxygenase activity (GO:0004497);; Molecular Function: iron ion binding (GO:0005506);; Cellular Component: integral component of membrane (GO:0016021);; Molecular Function: oxidoreductase activity, acting on paired donors, with incorporation or reduction of molecular oxygen (GO:0016705);; Molecular Function: heme binding (GO:0020037);;	K15402|1.7e-235|lsv:111884821|K15402 fatty acid omega-hydroxylase [EC:1.14.-.-] | (RefSeq) cytochrome P450 86B1-like	Cutin, suberine and wax biosynthesis (ko00073)	[QI]	Secondary metabolites biosynthesis, transport and catabolism;; Lipid transport and metabolism	Cytochrome P450	Cytochrome P450 86B1 OS=Arabidopsis thaliana OX=3702 GN=CYP86B1 PE=2 SV=1	Q	Secondary metabolites biosynthesis, transport and catabolism	Cytochrome P450 86B1 like [Actinidia chinensis var. chinensis]
gene-CEY00_Acc06801	33	51	66	138	145	169	1.63671	2.58831	3.08842	6.32694	7.24566	6.42691	3.14e-08	1.19078	up	--	--	Biological Process: integrin-mediated signaling pathway (GO:0007229);;	--	--	--	--	--	--	--	--	A disintegrin and metalloproteinase with thrombospondin motifs 7 like [Actinidia chinensis var. chinensis]
gene-CEY00_Acc21939	18	15	19	91	87	81	0.594252	0.494071	0.607996	2.83127	2.963	2.09469	1.67e-10	1.56011	up	[O]	Posttranslational modification, protein turnover, chaperones	Molecular Function: transferase activity (GO:0016740);;	K00799|8.9e-85|vvi:100250043|K00799 glutathione S-transferase [EC:2.5.1.18] | (RefSeq) glutathione S-transferase U9-like	Glutathione metabolism (ko00480)	[O]	Posttranslational modification, protein turnover, chaperones	Glutathione S-transferase, N-terminal domain	Glutathione S-transferase U9 OS=Arabidopsis thaliana OX=3702 GN=GSTU9 PE=2 SV=1	O	Posttranslational modification, protein turnover, chaperones	Glutathione S-transferase [Actinidia chinensis var. chinensis]
gene-CEY00_Acc26920	469	482	487	168	180	208	14.8502	15.4367	14.3876	4.82884	5.65359	4.96314	4.88e-27	-1.3951	down	--	--	Molecular Function: motor activity (GO:0003774);; Cellular Component: cytoplasm (GO:0005737);; Cellular Component: microtubule (GO:0005874);; Biological Process: microtubule-based process (GO:0007017);; Cellular Component: dynein complex (GO:0030286);;	K10418|2.7e-46|oeu:111366599|K10418 dynein light chain LC8-type | (RefSeq) dynein light chain 1, cytoplasmic-like	--	[Z]	Cytoskeleton	Dynein light chain type 1	--	Z	Cytoskeleton	Dynein light chain like [Actinidia chinensis var. chinensis]
gene-CEY00_Acc05263	119	87	120	382	299	366	3.5075	2.59036	3.29825	10.2744	8.78029	8.15305	4.39e-18	1.4023	up	[R]	General function prediction only	Molecular Function: chitinase activity (GO:0004568);; Biological Process: carbohydrate metabolic process (GO:0005975);; Biological Process: chitin catabolic process (GO:0006032);; Molecular Function: chitin binding (GO:0008061);; Biological Process: cell wall macromolecule catabolic process (GO:0016998);;	K20547|6.0e-100|ghi:107895471|K20547 basic endochitinase B [EC:3.2.1.14] | (RefSeq) endochitinase-like	Amino sugar and nucleotide sugar metabolism (ko00520);; MAPK signaling pathway - plant (ko04016)	[R]	General function prediction only	Chitinase class I	Endochitinase OS=Pisum sativum OX=3888 PE=2 SV=1	U	Intracellular trafficking, secretion, and vesicular transport	Endochitinase [Actinidia chinensis var. chinensis]
gene-CEY00_Acc32453	1343	1443	1395	650	658	748	25.4937	27.7343	24.7141	11.2312	12.4319	10.7192	1.11e-27	-1.09965	down	[C]	Energy production and conversion	Biological Process: cellular aldehyde metabolic process (GO:0006081);; Molecular Function: oxidoreductase activity, acting on the aldehyde or oxo group of donors, NAD or NADP as acceptor (GO:0016620);;	K00128|1.7e-210|nsy:104219448|K00128 aldehyde dehydrogenase (NAD+) [EC:1.2.1.3] | (RefSeq) aldehyde dehydrogenase family 3 member F1-like	Glycolysis / Gluconeogenesis (ko00010);; Ascorbate and aldarate metabolism (ko00053);; Fatty acid degradation (ko00071);; Valine, leucine and isoleucine degradation (ko00280);; Lysine degradation (ko00310);; Arginine and proline metabolism (ko00330);; Histidine metabolism (ko00340);; Tryptophan metabolism (ko00380);; beta-Alanine metabolism (ko00410);; Glycerolipid metabolism (ko00561);; Pyruvate…	[C]	Energy production and conversion	Aldehyde dehydrogenase family	Aldehyde dehydrogenase family 3 member F1 OS=Arabidopsis thaliana OX=3702 GN=ALDH3F1 PE=2 SV=2	C	Energy production and conversion	Aldehyde dehydrogenase family 3 member like [Actinidia chinensis var. chinensis]
gene-CEY00_Acc31796	37	58	64	194	161	217	0.622115	0.984887	1.0177	3.00959	2.73045	2.78377	2.21e-13	1.4427	up	[QV]	Secondary metabolites biosynthesis, transport and catabolism;; Defense mechanisms	Molecular Function: monooxygenase activity (GO:0004497);; Molecular Function: iron ion binding (GO:0005506);; Molecular Function: oxidoreductase activity, acting on paired donors, with incorporation or reduction of molecular oxygen (GO:0016705);; Molecular Function: heme binding (GO:0020037);;	K15401|4.2e-260|vvi:100243236|K15401 long-chain fatty acid omega-monooxygenase [EC:1.14.14.80] | (RefSeq) cytochrome P450 86A1	Fatty acid degradation (ko00071);; Cutin, suberine and wax biosynthesis (ko00073)	[QI]	Secondary metabolites biosynthesis, transport and catabolism;; Lipid transport and metabolism	Cytochrome P450	Cytochrome P450 86A1 OS=Arabidopsis thaliana OX=3702 GN=CYP86A1 PE=1 SV=2	Q	Secondary metabolites biosynthesis, transport and catabolism	Cytochrome P450 86A1 like [Actinidia chinensis var. chinensis]
gene-CEY00_Acc06203	25	18	26	123	118	168	0.419059	0.307869	0.411444	1.88716	1.99191	2.13865	2.39e-18	1.89606	up	[V]	Defense mechanisms	Molecular Function: antiporter activity (GO:0015297);; Cellular Component: integral component of membrane (GO:0016021);; Molecular Function: xenobiotic transporter activity (GO:0042910);;	K03327|1.1e-226|nau:109236806|K03327 multidrug resistance protein, MATE family | (RefSeq) protein DETOXIFICATION 29-like	--	[R]	General function prediction only	MatE	Protein DETOXIFICATION 31 OS=Arabidopsis thaliana OX=3702 GN=DTX31 PE=2 SV=1	V	Defense mechanisms	Protein DETOXIFICATION like [Actinidia chinensis var. chinensis]
gene-CEY00_Acc16378	39	46	37	122	84	117	0.989931	1.19446	0.890037	2.85638	2.15608	2.27826	8.34e-06	1.01111	up	--	--	Cellular Component: proton-transporting two-sector ATPase complex, catalytic domain (GO:0033178);; Molecular Function: proton-transporting ATPase activity, rotational mechanism (GO:0046961);;	K02150|1.0e-97|lja:Lj4g3v3002500.1|K02150 V-type H+-transporting ATPase subunit E | (RefSeq) Lj4g3v3002500.1; -	Oxidative phosphorylation (ko00190);; Phagosome (ko04145)	[C]	Energy production and conversion	ATP synthase (E/31 kDa) subunit	V-type proton ATPase subunit E OS=Gossypium hirsutum OX=3635 GN=VATE PE=2 SV=1	C	Energy production and conversion	V-type proton ATPase subunit E like [Actinidia chinensis var. chinensis]
gene-CEY00_Acc14444	81	105	64	242	222	283	2.21624	2.88645	1.62841	6.03355	6.04153	5.8516	8.63e-12	1.25474	up	--	--	Molecular Function: metal ion binding (GO:0046872);;	K18753|7.8e-07|ccav:112501054|K18753 butyrate response factor | (RefSeq) zinc finger CCCH domain-containing protein 14-like	--	[R]	General function prediction only	Zinc finger C-x8-C-x5-C-x3-H type (and similar)	Zinc finger CCCH domain-containing protein 39 OS=Arabidopsis thaliana OX=3702 GN=At3g19360 PE=2 SV=1	S	Function unknown	Zinc finger CCCH domain-containing protein [Actinidia chinensis var. chinensis]
gene-CEY00_Acc14324	434	397	437	910	906	1098	9.98461	9.25472	9.39946	19.0781	20.7931	19.0848	9.11e-23	1.03352	up	--	--	Biological Process: response to acid chemical (GO:0001101);; Biological Process: regulation of immune system process (GO:0002682);; Biological Process: regulation of response to biotic stimulus (GO:0002831);; Molecular Function: molecular_function (GO:0003674);; Molecular Function: transcription cofactor activity (GO:0003712);; Molecular Function: transcription corepressor activity (GO:0003714);;…	K13464|5.3e-37|mesc:110620390|K13464 jasmonate ZIM domain-containing protein | (RefSeq) protein TIFY 9-like isoform X1	Plant hormone signal transduction (ko04075)	--	--	Jas motif	Protein TIFY 9 OS=Arabidopsis thaliana OX=3702 GN=TIFY9 PE=1 SV=1	S	Function unknown	Protein TIFY like [Actinidia chinensis var. chinensis]
gene-CEY00_Acc23911	365	315	356	164	146	205	7.49236	6.56102	6.83712	3.06702	2.97893	3.17786	7.94e-14	-1.05245	down	[V]	Defense mechanisms	Molecular Function: antiporter activity (GO:0015297);; Cellular Component: integral component of membrane (GO:0016021);; Molecular Function: xenobiotic transporter activity (GO:0042910);;	K03327|1.1e-206|nto:104092955|K03327 multidrug resistance protein, MATE family | (RefSeq) protein DETOXIFICATION 27-like	--	[R]	General function prediction only	MatE	Protein DETOXIFICATION 27 OS=Arabidopsis thaliana OX=3702 GN=DTX27 PE=2 SV=1	V	Defense mechanisms	Protein DETOXIFICATION like [Actinidia chinensis var. chinensis]
gene-CEY00_Acc23451	37	16	24	78	100	112	0.629417	0.276118	0.385901	1.21868	1.72864	1.46089	1.72e-07	1.28891	up	--	--	Cellular Component: integral component of membrane (GO:0016021);; Biological Process: transmembrane transport (GO:0055085);;	K24139|3.3e-170|nsy:104244817|K24139 auxin efflux carrier family protein | (RefSeq) uncharacterized transporter YBR287W-like isoform X1	--	[S]	Function unknown	Membrane transport protein	Protein PIN-LIKES 1 OS=Arabidopsis thaliana OX=3702 GN=PILS1 PE=2 SV=1	L	Replication, recombination and repair	Protein PIN-LIKES like [Actinidia chinensis var. chinensis]
gene-CEY00_Acc31815	16	14	12	131	113	143	0.219144	0.186975	0.146621	1.66777	1.57093	1.50829	1.02e-23	2.26567	up	[E]	Amino acid transport and metabolism	Molecular Function: asparagine synthase (glutamine-hydrolyzing) activity (GO:0004066);; Molecular Function: ATP binding (GO:0005524);; Biological Process: asparagine biosynthetic process (GO:0006529);; Biological Process: glutamine metabolic process (GO:0006541);;	K01953|0.0e+00|cpap:110823628|K01953 asparagine synthase (glutamine-hydrolysing) [EC:6.3.5.4] | (RefSeq) asparagine synthetase [glutamine-hydrolyzing] 1	Alanine, aspartate and glutamate metabolism (ko00250);; Biosynthesis of amino acids (ko01230)	[E]	Amino acid transport and metabolism	Asparagine synthase	Asparagine synthetase [glutamine-hydrolyzing] OS=Asparagus officinalis OX=4686 PE=2 SV=2	E	Amino acid transport and metabolism	Asparagine synthetase [Actinidia chinensis var. chinensis]
gene-CEY00_Acc00022	149	93	82	390	329	374	4.35692	2.72404	2.22259	10.3598	9.58472	8.23919	2.35e-14	1.4094	up	[G]	Carbohydrate transport and metabolism	Molecular Function: hydrolase activity, hydrolyzing O-glycosyl compounds (GO:0004553);; Cellular Component: cell wall (GO:0005618);; Biological Process: xyloglucan metabolic process (GO:0010411);; Molecular Function: xyloglucan:xyloglucosyl transferase activity (GO:0016762);; Biological Process: cell wall biogenesis (GO:0042546);; Cellular Component: apoplast (GO:0048046);; Biological Process: ce…	K08235|7.1e-127|pop:7464633|K08235 xyloglucan:xyloglucosyl transferase [EC:2.4.1.207] | (RefSeq) xyloglucan endotransglucosylase/hydrolase 2	--	--	--	Glycosyl hydrolases family 16	Xyloglucan endotransglucosylase/hydrolase protein 15 OS=Arabidopsis thaliana OX=3702 GN=XTH15 PE=1 SV=1	G	Carbohydrate transport and metabolism	Xyloglucan endotransglucosylase/hydrolase [Actinidia chinensis var. chinensis]
gene-CEY00_Acc10526	27	37	58	180	105	148	1.2834	1.8064	2.60688	7.93053	5.03052	5.4205	2.53e-08	1.29858	up	--	--	--	--	--	--	--	--	--	--	--	SCO-spondin like [Actinidia chinensis var. chinensis]
gene-CEY00_Acc04802	605	589	577	1574	1080	1593	9.25733	9.11863	8.22839	21.9186	16.4563	18.395	6.3e-20	1.07287	up	--	--	Molecular Function: ATP binding (GO:0005524);; Cellular Component: nucleus (GO:0005634);; Biological Process: transcription, DNA-templated (GO:0006351);; Biological Process: regulation of transcription, DNA-templated (GO:0006355);; Biological Process: developmental process (GO:0032502);;	K22382|1.6e-12|oeu:111408549|K22382 WD repeat-containing protein 26 | (RefSeq) WD repeat-containing protein 26 homolog	--	--	--	WRC	Growth-regulating factor 6 OS=Oryza sativa subsp. japonica OX=39947 GN=GRF6 PE=2 SV=2	K	Transcription	Growth-regulating factor like [Actinidia chinensis var. chinensis]
gene-CEY00_Acc01301	61	77	47	223	191	247	2.14438	2.72504	1.52693	7.17208	6.71744	6.58596	1.63e-14	1.4548	up	[Q]	Secondary metabolites biosynthesis, transport and catabolism	Molecular Function: oxidoreductase activity (GO:0016491);; Molecular Function: metal ion binding (GO:0046872);;	K24028|3.5e-74|tcc:18605868|K24028 salicylic acid 3-hydroxylase [EC:1.14.11.-] | (RefSeq) protein DOWNY MILDEW RESISTANCE 6	--	[QR]	Secondary metabolites biosynthesis, transport and catabolism;; General function prediction only	2OG-Fe(II) oxygenase superfamily	Flavanone 3-dioxygenase 2 OS=Oryza sativa subsp. japonica OX=39947 GN=F3H-2 PE=1 SV=1	Q	Secondary metabolites biosynthesis, transport and catabolism	Protein DOWNY MILDEW RESISTANCE like [Actinidia chinensis var. chinensis]
gene-CEY00_Acc33034	34	42	32	169	89	128	0.841331	1.06336	0.73747	3.86793	2.22861	2.43948	2.47e-08	1.3002	up	[Q]	Secondary metabolites biosynthesis, transport and catabolism	Molecular Function: oxidoreductase activity (GO:0016491);; Molecular Function: metal ion binding (GO:0046872);;	K24028|2.0e-91|aip:107605905|K24028 salicylic acid 3-hydroxylase [EC:1.14.11.-] | (RefSeq) protein DMR6-LIKE OXYGENASE 1	--	[QR]	Secondary metabolites biosynthesis, transport and catabolism;; General function prediction only	2OG-Fe(II) oxygenase superfamily	2-oxoglutarate-dependent dioxygenase 19 OS=Oryza sativa subsp. japonica OX=39947 GN=2ODD19 PE=1 SV=1	Q	Secondary metabolites biosynthesis, transport and catabolism	Protein DMR6-LIKE OXYGENASE 2 like [Actinidia chinensis var. chinensis]
gene-CEY00_Acc29860	582	538	578	296	226	366	9.15419	8.57325	8.48984	4.23639	3.533	4.34124	5.36e-16	-1.00859	down	--	--	Biological Process: phototropism (GO:0009638);; Molecular Function: kinase activity (GO:0016301);;	--	--	--	--	--	Protein PHYTOCHROME KINASE SUBSTRATE 3 OS=Arabidopsis thaliana OX=3702 GN=PKS3 PE=2 SV=2	S	Function unknown	Protein PHYTOCHROME KINASE SUBSTRATE like [Actinidia chinensis var. chinensis]
gene-CEY00_Acc03099	62	60	74	184	133	168	3.82958	3.77292	4.25061	10.404	8.21405	7.90213	4.43e-07	1.00539	up	--	--	Molecular Function: transferase activity, transferring acyl groups other than amino-acyl groups (GO:0016747);;	--	--	--	--	Transferase family	Protein ECERIFERUM 26-like OS=Arabidopsis thaliana OX=3702 GN=CER26L PE=2 SV=1	S	Function unknown	Protein ECERIFERUM 26-like [Actinidia chinensis var. chinensis]
gene-CEY00_Acc25949	19	26	16	92	99	103	0.72675	1.00029	0.578117	3.22918	3.78982	3.00738	3.85e-11	1.56929	up	--	--	--	--	--	--	--	Senescence regulator	--	S	Function unknown	Polyadenylation and cleavage factor like [Actinidia chinensis var. chinensis]
gene-CEY00_Acc16577	171	131	140	381	333	377	2.99605	2.32742	2.28632	6.08692	5.81348	4.99035	3.85e-12	1.07814	up	[QV]	Secondary metabolites biosynthesis, transport and catabolism;; Defense mechanisms	Molecular Function: monooxygenase activity (GO:0004497);; Molecular Function: iron ion binding (GO:0005506);; Cellular Component: integral component of membrane (GO:0016021);; Molecular Function: oxidoreductase activity, acting on paired donors, with incorporation or reduction of molecular oxygen (GO:0016705);; Molecular Function: heme binding (GO:0020037);;	K20617|1.4e-149|pda:103697394|K20617 cytochrome P450 family 71 subfamily A | (RefSeq) cytochrome P450 71A1-like	--	[Q]	Secondary metabolites biosynthesis, transport and catabolism	Cytochrome P450	2-methylbutanal oxime monooxygenase OS=Manihot esculenta OX=3983 GN=CYP71E7 PE=1 SV=1	Q	Secondary metabolites biosynthesis, transport and catabolism	2-methylbutanal oxime monooxygenase [Actinidia chinensis var. chinensis]
gene-CEY00_Acc18908	190	149	128	381	337	452	4.13818	3.28615	2.5994	7.55938	7.33699	7.45683	5.72e-12	1.0833	up	[E]	Amino acid transport and metabolism	Molecular Function: L-aspartate:2-oxoglutarate aminotransferase activity (GO:0004069);; Biological Process: cellular amino acid metabolic process (GO:0006520);; Biological Process: biosynthetic process (GO:0009058);; Molecular Function: pyridoxal phosphate binding (GO:0030170);;	K14455|5.5e-181|sind:105165617|K14455 aspartate aminotransferase, mitochondrial [EC:2.6.1.1] | (RefSeq) aspartate aminotransferase, mitochondrial	Arginine biosynthesis (ko00220);; Alanine, aspartate and glutamate metabolism (ko00250);; Cysteine and methionine metabolism (ko00270);; Arginine and proline metabolism (ko00330);; Tyrosine metabolism (ko00350);; Phenylalanine metabolism (ko00360);; Phenylalanine, tyrosine and tryptophan biosynthesis (ko00400);; Carbon fixation in photosynthetic organisms (ko00710);; Isoquinoline alkaloid biosynt…	[E]	Amino acid transport and metabolism	Aminotransferase class I and II	Aspartate aminotransferase, mitochondrial OS=Arabidopsis thaliana OX=3702 GN=ASP1 PE=1 SV=1	E	Amino acid transport and metabolism	Aspartate aminotransferase [Actinidia chinensis var. chinensis]
gene-CEY00_Acc20748	3774	3315	4104	1045	1438	1674	112.084	99.6791	113.763	28.2219	42.5558	37.5203	1.33e-30	-1.45315	down	--	--	Cellular Component: photosystem I (GO:0009522);; Cellular Component: photosystem II (GO:0009523);; Cellular Component: chloroplast thylakoid membrane (GO:0009535);; Biological Process: photosynthesis, light harvesting (GO:0009765);; Cellular Component: integral component of membrane (GO:0016021);; Molecular Function: chlorophyll binding (GO:0016168);; Biological Process: protein-chromophore linka…	K08912|1.0e-140|gab:108489181|K08912 light-harvesting complex II chlorophyll a/b binding protein 1 | (RefSeq) chlorophyll a-b binding protein of LHCII type 1-like	Photosynthesis - antenna proteins (ko00196)	--	--	Chlorophyll A-B binding protein	Chlorophyll a-b binding protein 40, chloroplastic OS=Nicotiana tabacum OX=4097 GN=CAB40 PE=2 SV=1	C	Energy production and conversion	Chlorophyll a-b binding protein like [Actinidia chinensis var. chinensis]
gene-CEY00_Acc05800	5	3	2	34	34	49	0.181355	0.075065	0.060516	1.14232	1.24397	1.34386	1.72e-08	1.54596	up	--	--	Molecular Function: transferase activity, transferring acyl groups other than amino-acyl groups (GO:0016747);;	K13264|2.0e-51|lja:Lj2g3v1090790.1|K13264 isoflavone 7-O-glucoside-6''-O-malonyltransferase [EC:2.3.1.115] | (RefSeq) Lj2g3v1090790.1; -	Isoflavonoid biosynthesis (ko00943);; Flavone and flavonol biosynthesis (ko00944)	--	--	Transferase family	Phenolic glucoside malonyltransferase 1 OS=Arabidopsis thaliana OX=3702 GN=PMAT1 PE=1 SV=1	S	Function unknown	Phenolic glucoside malonyltransferase [Actinidia chinensis var. chinensis]
gene-CEY00_Acc24751	131	116	129	415	238	301	4.57864	4.0793	4.20671	13.2132	8.29689	7.9488	2.11e-08	1.05791	up	--	--	Biological Process: reproduction (GO:0000003);; Biological Process: regionalization (GO:0003002);; Biological Process: developmental process involved in reproduction (GO:0003006);; Cellular Component: cellular_component (GO:0005575);; Cellular Component: intracellular (GO:0005622);; Cellular Component: cell (GO:0005623);; Cellular Component: nucleus (GO:0005634);; Cellular Component: nucleoplasm …	K13944|2.2e-29|gra:105792299|K13944 LOB domain-containing protein 16 | (RefSeq) LOB domain-containing protein 16	--	--	--	Lateral organ boundaries (LOB) domain	Protein ASYMMETRIC LEAVES 2 OS=Arabidopsis thaliana OX=3702 GN=AS2 PE=1 SV=1	S	Function unknown	LOB domain-containing protein [Actinidia chinensis var. chinensis]
gene-CEY00_Acc29071	13	9	13	97	51	84	0.336258	0.236916	0.331471	2.40513	1.37194	1.72407	8.89e-11	1.66338	up	[H]	Coenzyme transport and metabolism	Molecular Function: alternative oxidase activity (GO:0009916);; Cellular Component: integral component of membrane (GO:0016021);; Molecular Function: metal ion binding (GO:0046872);; Cellular Component: respiratory chain (GO:0070469);; Molecular Function: ubiquinol:oxygen oxidoreductase activity (GO:0102721);;	K17893|4.4e-143|cann:107853552|K17893 ubiquinol oxidase [EC:1.10.3.11] | (RefSeq) ubiquinol oxidase 2, mitochondrial-like	--	--	--	Alternative oxidase	Ubiquinol oxidase 3, mitochondrial OS=Arabidopsis thaliana OX=3702 GN=AOX3 PE=1 SV=2	Q	Secondary metabolites biosynthesis, transport and catabolism	Ubiquinol oxidase [Actinidia chinensis var. chinensis]
gene-CEY00_Acc10537	15	12	17	60	48	41	0.227919	0.186831	0.248497	0.864064	0.756577	0.491286	0.000213492	1.02477	up	--	--	--	--	--	--	--	--	--	S	Function unknown	WEB family protein [Actinidia chinensis var. chinensis]
gene-CEY00_Acc09622	713	681	710	1685	1614	2221	6.68095	6.46404	6.21128	14.3777	15.0761	15.7214	3.54e-41	1.22103	up	--	--	Molecular Function: DNA binding (GO:0003677);; Cellular Component: nucleus (GO:0005634);; Molecular Function: lipid binding (GO:0008289);;	K09338|0.0e+00|sind:105175372|K09338 homeobox-leucine zipper protein | (RefSeq) homeobox-leucine zipper protein MERISTEM L1	--	--	--	START domain	Homeobox-leucine zipper protein PROTODERMAL FACTOR 2 OS=Arabidopsis thaliana OX=3702 GN=PDF2 PE=1 SV=1	K	Transcription	Homeobox-leucine zipper protein like [Actinidia chinensis var. chinensis]
gene-CEY00_Acc21375	12	17	15	62	36	54	0.318362	0.456344	0.367695	1.55355	0.992601	1.13022	0.000156132	1.0391	up	--	--	Molecular Function: transcription factor activity, sequence-specific DNA binding (GO:0003700);; Cellular Component: nucleus (GO:0005634);; Molecular Function: sequence-specific DNA binding (GO:0043565);;	K13425|5.3e-28|egu:105047514|K13425 WRKY transcription factor 22 | (RefSeq) WRKY transcription factor 22-like	MAPK signaling pathway - plant (ko04016);; Plant-pathogen interaction (ko04626)	--	--	WRKY DNA -binding domain	Probable WRKY transcription factor 65 OS=Arabidopsis thaliana OX=3702 GN=WRKY65 PE=2 SV=1	K	Transcription	WRKY transcription factor 65 [Actinidia chinensis var. chinensis]
gene-CEY00_Acc09724	541	547	636	292	263	322	13.0937	13.4006	14.3554	6.41572	6.32214	5.88328	1.37e-17	-1.03591	down	--	--	Molecular Function: translation initiation factor activity (GO:0003743);;	--	--	--	--	--	--	--	--	Translation initiation factor IF-2 like [Actinidia chinensis var. chinensis]
gene-CEY00_Acc28540	19	12	13	110	69	101	0.390232	0.258306	0.245632	2.12997	1.46964	1.62026	7.7e-13	1.75447	up	--	--	Molecular Function: DNA binding (GO:0003677);; Molecular Function: transcription factor activity, sequence-specific DNA binding (GO:0003700);; Cellular Component: nucleus (GO:0005634);;	K09287|2.8e-141|vvi:100262843|K09287 RAV-like factor | (RefSeq) AP2/ERF and B3 domain-containing transcription factor RAV1	--	--	--	B3 DNA binding domain	AP2/ERF and B3 domain-containing transcription repressor TEM1 OS=Arabidopsis thaliana OX=3702 GN=TEM1 PE=1 SV=1	K	Transcription	AP2/ERF and B3 domain-containing transcription repressor like [Actinidia chinensis var. chinensis]
gene-CEY00_Acc13783	114	95	111	27	51	57	4.64401	3.91649	4.23736	0.985506	2.03929	1.75168	4.92e-06	-1.06239	down	--	--	Molecular Function: kinase activity (GO:0016301);;	--	--	--	--	Wound-induced protein	--	S	Function unknown	Inositol-tetrakisphosphate 1-kinase [Actinidia chinensis var. chinensis]
gene-CEY00_Acc33179	506	526	533	215	151	258	8.5756	9.02508	8.42773	3.30976	2.54499	3.29809	1.35e-24	-1.36233	down	[G]	Carbohydrate transport and metabolism	Molecular Function: polygalacturonase activity (GO:0004650);; Cellular Component: extracellular region (GO:0005576);; Biological Process: carbohydrate metabolic process (GO:0005975);; Biological Process: cell wall organization (GO:0071555);;	K01213|3.3e-150|aip:107645968|K01213 galacturan 1,4-alpha-galacturonidase [EC:3.2.1.67] | (RefSeq) polygalacturonase At1g48100-like	Pentose and glucuronate interconversions (ko00040)	--	--	Glycosyl hydrolases family 28	Polygalacturonase At1g48100 OS=Arabidopsis thaliana OX=3702 GN=At1g48100 PE=2 SV=1	G	Carbohydrate transport and metabolism	Polygalacturonase [Actinidia chinensis var. chinensis]
gene-CEY00_Acc13158	147	138	148	59	40	41	2.73397	2.60621	2.56879	0.988874	0.743195	0.569272	5.48e-12	-1.4255	down	--	--	Molecular Function: kinase activity (GO:0016301);;	--	--	--	--	Remorin, C-terminal region	Remorin 4.1 OS=Oryza sativa subsp. japonica OX=39947 GN=REM4.1 PE=1 SV=1	S	Function unknown	Atypical kinase [Actinidia chinensis var. chinensis]
gene-CEY00_Acc32814	606	614	592	333	248	323	10.0951	10.3641	9.21073	5.0517	4.12087	4.05395	3.59e-17	-1.06026	down	[G]	Carbohydrate transport and metabolism	Molecular Function: polygalacturonase activity (GO:0004650);; Cellular Component: extracellular region (GO:0005576);; Biological Process: carbohydrate metabolic process (GO:0005975);; Biological Process: cell wall organization (GO:0071555);;	K01184|1.1e-173|pmum:103329840|K01184 polygalacturonase [EC:3.2.1.15] | (RefSeq) polygalacturonase At1g48100	Pentose and glucuronate interconversions (ko00040)	--	--	Glycosyl hydrolases family 28	Polygalacturonase At1g48100 OS=Arabidopsis thaliana OX=3702 GN=At1g48100 PE=2 SV=1	G	Carbohydrate transport and metabolism	Polygalacturonase [Actinidia chinensis var. chinensis]
gene-CEY00_Acc18281	4	11	5	86	70	56	0.128973	0.357553	0.131404	2.64864	2.37686	1.41656	3e-12	1.84203	up	--	--	Molecular Function: calcium ion binding (GO:0005509);; Cellular Component: integral component of membrane (GO:0016021);;	K02183|1.9e-19|zju:107429008|K02183 calmodulin | (RefSeq) probable calcium-binding protein CML30	MAPK signaling pathway - plant (ko04016);; Phosphatidylinositol signaling system (ko04070);; Plant-pathogen interaction (ko04626)	[T]	Signal transduction mechanisms	EF hand	Probable calcium-binding protein CML46 OS=Arabidopsis thaliana OX=3702 GN=CML46 PE=1 SV=1	T	Signal transduction mechanisms	Calcium-binding protein CML47 [Actinidia chinensis var. chinensis]
gene-CEY00_Acc04573	27	45	39	166	117	153	0.55649	0.947147	0.768959	3.18674	2.45351	2.43155	1.21e-11	1.46923	up	[QV]	Secondary metabolites biosynthesis, transport and catabolism;; Defense mechanisms	Molecular Function: monooxygenase activity (GO:0004497);; Molecular Function: iron ion binding (GO:0005506);; Molecular Function: oxidoreductase activity, acting on paired donors, with incorporation or reduction of molecular oxygen (GO:0016705);; Molecular Function: heme binding (GO:0020037);;	K20617|5.1e-151|lja:Lj3g3v1475790.2|K20617 cytochrome P450 family 71 subfamily A | (RefSeq) Lj3g3v1475790.2; -	--	[Q]	Secondary metabolites biosynthesis, transport and catabolism	Cytochrome P450	Cytochrome P450 71A1 OS=Persea americana OX=3435 GN=CYP71A1 PE=1 SV=2	Q	Secondary metabolites biosynthesis, transport and catabolism	Cytochrome P450 71A1 like, partial [Actinidia chinensis var. chinensis]
gene-CEY00_Acc13744	572	590	584	1943	1619	2165	8.65321	9.04823	8.24986	26.7815	24.4398	24.7571	2.78e-62	1.53408	up	[IQ]	Lipid transport and metabolism;; Secondary metabolites biosynthesis, transport and catabolism	Biological Process: cell morphogenesis (GO:0000902);; Molecular Function: molecular_function (GO:0003674);; Molecular Function: catalytic activity (GO:0003824);; Cellular Component: cellular_component (GO:0005575);; Cellular Component: intracellular (GO:0005622);; Cellular Component: cell (GO:0005623);; Cellular Component: cytoplasm (GO:0005737);; Biological Process: cellular aromatic compound me…	K14487|0.0e+00|rcu:8287873|K14487 auxin responsive GH3 gene family | (RefSeq) indole-3-acetic acid-amido synthetase GH3.6	Plant hormone signal transduction (ko04075)	--	--	GH3 auxin-responsive promoter	Indole-3-acetic acid-amido synthetase GH3.6 OS=Arabidopsis thaliana OX=3702 GN=GH3.6 PE=1 SV=1	S	Function unknown	Indole-3-acetic acid-amido synthetase [Actinidia chinensis var. chinensis]
gene-CEY00_Acc24060	495	451	519	226	212	274	13.3901	12.3619	13.1173	5.55162	5.71361	5.58825	8.2e-19	-1.09825	down	--	--	Cellular Component: endoplasmic reticulum membrane (GO:0005789);; Cellular Component: integral component of plasma membrane (GO:0005887);; Molecular Function: sugar transmembrane transporter activity (GO:0051119);; Biological Process: protein homooligomerization (GO:0051260);;	K15382|3.5e-98|egr:104449640|K15382 solute carrier family 50 (sugar transporter) | (RefSeq) bidirectional sugar transporter SWEET1	--	[R]	General function prediction only	Sugar efflux transporter for intercellular exchange	Bidirectional sugar transporter SWEET1 OS=Arabidopsis thaliana OX=3702 GN=SWEET1 PE=1 SV=1	U	Intracellular trafficking, secretion, and vesicular transport	Bidirectional sugar transporter like [Actinidia chinensis var. chinensis]
gene-CEY00_Acc06935	11	9	15	143	103	104	0.191249	0.155794	0.24407	2.29789	1.80873	1.38512	9.74e-20	2.1882	up	[G]	Carbohydrate transport and metabolism	Molecular Function: UDP-glycosyltransferase activity (GO:0008194);;	K23260|8.7e-191|tcc:18607969|K23260 scopoletin glucosyltransferase [EC:2.4.1.128] | (RefSeq) scopoletin glucosyltransferase	Phenylpropanoid biosynthesis (ko00940)	[GC]	Carbohydrate transport and metabolism;; Energy production and conversion	UDP-glucoronosyl and UDP-glucosyl transferase	Scopoletin glucosyltransferase OS=Nicotiana tabacum OX=4097 GN=TOGT1 PE=1 SV=1	--	--	Scopoletin glucosyltransferase [Actinidia chinensis var. chinensis]
gene-CEY00_Acc15396	26	22	33	72	91	107	0.617452	0.546228	0.733952	1.60241	2.20333	1.9722	5.57e-07	1.20258	up	--	--	Molecular Function: zinc ion transmembrane transporter activity (GO:0005385);; Cellular Component: integral component of membrane (GO:0016021);;	K14709|2.1e-146|nau:109231805|K14709 solute carrier family 39 (zinc transporter), member 1/2/3 | (RefSeq) probable zinc transporter 10	--	[P]	Inorganic ion transport and metabolism	ZIP Zinc transporter	Probable zinc transporter 10 OS=Arabidopsis thaliana OX=3702 GN=ZIP10 PE=1 SV=2	P	Inorganic ion transport and metabolism	Fe(2+) transport protein [Actinidia chinensis var. chinensis]
gene-CEY00_Acc12279	60	58	64	164	139	151	1.56449	1.54754	1.57515	3.94043	3.64274	3.00607	3.85e-07	1.01666	up	--	--	Cellular Component: integral component of membrane (GO:0016021);;	--	--	--	--	--	--	--	--	NAD(P)H-quinone oxidoreductase subunit 3 like [Actinidia chinensis var. chinensis]
gene-CEY00_Acc15399	15	7	30	76	96	103	0.367762	0.171735	0.686346	1.74335	2.40938	1.95092	7.53e-09	1.49318	up	--	--	Molecular Function: zinc ion transmembrane transporter activity (GO:0005385);; Cellular Component: integral component of membrane (GO:0016021);;	K14709|1.3e-146|nau:109231805|K14709 solute carrier family 39 (zinc transporter), member 1/2/3 | (RefSeq) probable zinc transporter 10	--	[P]	Inorganic ion transport and metabolism	ZIP Zinc transporter	Probable zinc transporter 10 OS=Arabidopsis thaliana OX=3702 GN=ZIP10 PE=1 SV=2	P	Inorganic ion transport and metabolism	Fe(2+) transport protein [Actinidia chinensis var. chinensis]
gene-CEY00_Acc11474	0	0	0	57	68	72	0	0	0	1.2305	1.60942	1.28988	3.1e-22	2.54279	up	[Q]	Secondary metabolites biosynthesis, transport and catabolism	Molecular Function: oxidoreductase activity (GO:0016491);; Molecular Function: metal ion binding (GO:0046872);;	K06892|3.2e-145|nto:104106751|K06892 feruloyl-CoA 6-hydroxylase [EC:1.14.11.61] | (RefSeq) feruloyl CoA ortho-hydroxylase 2-like	Phenylpropanoid biosynthesis (ko00940)	[QR]	Secondary metabolites biosynthesis, transport and catabolism;; General function prediction only	2OG-Fe(II) oxygenase superfamily	Feruloyl CoA ortho-hydroxylase F6H1-2 OS=Ipomoea batatas OX=4120 GN=F6H1-2 PE=1 SV=1	Q	Secondary metabolites biosynthesis, transport and catabolism	Feruloyl CoA ortho-hydroxylase [Actinidia chinensis var. chinensis]
gene-CEY00_Acc15539	6	6	23	66	32	55	0.094434	0.092755	0.348511	0.985425	0.512979	0.676129	0.000246601	1.04756	up	--	--	Biological Process: malate transport (GO:0015743);; Cellular Component: integral component of membrane (GO:0016021);;	K03695|1.1e-28|egr:104416563|K03695 ATP-dependent Clp protease ATP-binding subunit ClpB | (RefSeq) chaperone protein ClpB1-like	--	[R]	General function prediction only	Aluminium activated malate transporter	Aluminum-activated malate transporter 10 OS=Arabidopsis thaliana OX=3702 GN=ALMT10 PE=3 SV=2	S	Function unknown	Aluminum-activated malate transporter like [Actinidia chinensis var. chinensis]
gene-CEY00_Acc08121	23	27	28	67	75	95	0.416533	0.495848	0.471594	1.10011	1.35785	1.30061	7.3e-06	1.09456	up	[E]	Amino acid transport and metabolism	Molecular Function: glutamate decarboxylase activity (GO:0004351);; Biological Process: glutamate metabolic process (GO:0006536);; Molecular Function: pyridoxal phosphate binding (GO:0030170);;	K01580|2.8e-261|vvi:100266215|K01580 glutamate decarboxylase [EC:4.1.1.15] | (RefSeq) glutamate decarboxylase 1	Alanine, aspartate and glutamate metabolism (ko00250);; beta-Alanine metabolism (ko00410);; Taurine and hypotaurine metabolism (ko00430);; Butanoate metabolism (ko00650)	[E]	Amino acid transport and metabolism	Pyridoxal-dependent decarboxylase conserved domain	Glutamate decarboxylase 4 OS=Arabidopsis thaliana OX=3702 GN=GAD4 PE=1 SV=1	E	Amino acid transport and metabolism	Glutamate decarboxylase [Actinidia chinensis var. chinensis]
gene-CEY00_Acc29398	18	21	29	85	61	85	0.149411	0.178881	0.223293	0.654057	0.512792	0.541979	2.33e-06	1.17756	up	[M]	Cell wall/membrane/envelope biogenesis	Molecular Function: protein serine/threonine kinase activity (GO:0004674);; Molecular Function: ATP binding (GO:0005524);; Cellular Component: integral component of membrane (GO:0016021);;	K13415|3.0e-61|egu:105047726|K13415 protein brassinosteroid insensitive 1 [EC:2.7.10.1 2.7.11.1] | (RefSeq) systemin receptor SR160-like	Plant hormone signal transduction (ko04075)	--	--	Protein kinase domain	Probable LRR receptor-like serine/threonine-protein kinase At1g74360 OS=Arabidopsis thaliana OX=3702 GN=At1g74360 PE=1 SV=1	T	Signal transduction mechanisms	LRR receptor-like serine/threonine-protein kinase [Actinidia chinensis var. chinensis]
gene-CEY00_Acc18073	83	67	67	21	30	33	1.95116	1.59717	1.46455	0.438539	0.707579	0.585387	9.76e-06	-1.09341	down	[G]	Carbohydrate transport and metabolism	Molecular Function: pectate lyase activity (GO:0030570);; Biological Process: pectin catabolic process (GO:0045490);; Molecular Function: metal ion binding (GO:0046872);;	K01728|4.4e-212|pop:7453817|K01728 pectate lyase [EC:4.2.2.2] | (RefSeq) probable pectate lyase 18	Pentose and glucuronate interconversions (ko00040)	--	--	Pectate lyase	Probable pectate lyase 18 OS=Arabidopsis thaliana OX=3702 GN=At4g24780 PE=2 SV=2	G	Carbohydrate transport and metabolism	Pectate lyase [Actinidia chinensis var. chinensis]
gene-CEY00_Acc24848	13	15	7	77	79	77	0.241741	0.291843	0.119375	1.3659	1.53078	1.14264	1.66e-11	1.70655	up	--	--	Molecular Function: protein binding (GO:0005515);;	--	--	--	--	F-box domain	Putative F-box/LRR-repeat protein At3g18150 OS=Arabidopsis thaliana OX=3702 GN=At3g18150 PE=4 SV=2	S	Function unknown	F-box protein [Actinidia chinensis var. chinensis]
gene-CEY00_Acc06864	490	454	471	1963	1941	2311	22.1519	20.771	19.8548	80.8081	87.4648	78.9242	1.02e-94	1.94281	up	[S]	Function unknown	Cellular Component: extracellular region (GO:0005576);;	K13449|4.3e-65|jre:108992380|K13449 pathogenesis-related protein 1 | (RefSeq) pathogenesis-related protein 1-like	MAPK signaling pathway - plant (ko04016);; Plant hormone signal transduction (ko04075);; Plant-pathogen interaction (ko04626)	[S]	Function unknown	Cysteine-rich secretory protein family	Pathogenesis-related protein PR-1 type OS=Sambucus nigra OX=4202 PE=2 SV=1	S	Function unknown	Pathogenesis-related protein PR-1 type like [Actinidia chinensis var. chinensis]
gene-CEY00_Acc01009	5586	4615	5073	2315	1879	2575	106.627	89.1768	90.389	40.2126	35.7402	37.1076	7.92e-43	-1.25892	down	[G]	Carbohydrate transport and metabolism	Molecular Function: hydrolase activity, hydrolyzing O-glycosyl compounds (GO:0004553);; Biological Process: carbohydrate metabolic process (GO:0005975);;	K19355|2.2e-217|pper:18771386|K19355 mannan endo-1,4-beta-mannosidase [EC:3.2.1.78] | (RefSeq) mannan endo-1,4-beta-mannosidase 7	Fructose and mannose metabolism (ko00051)	--	--	Cellulase (glycosyl hydrolase family 5)	Mannan endo-1,4-beta-mannosidase 7 OS=Arabidopsis thaliana OX=3702 GN=MAN7 PE=2 SV=1	G	Carbohydrate transport and metabolism	Mannan endo-1,4-beta-mannosidase [Actinidia chinensis var. chinensis]
gene-CEY00_Acc19942	33	21	49	138	108	75	1.88777	1.20501	2.64265	7.38431	6.30385	3.3302	4.07e-05	1.07158	up	--	--	--	--	--	--	--	--	Protein LITTLE ZIPPER 1 OS=Arabidopsis thaliana OX=3702 GN=ZPR1 PE=1 SV=1	--	--	Protein LITTLE ZIPPER like [Actinidia chinensis var. chinensis]
gene-CEY00_Acc27169	208	272	281	986	1118	1045	8.48865	11.2194	10.7007	36.6044	45.4367	32.1817	1.07e-35	1.78286	up	--	--	Molecular Function: protein phosphatase inhibitor activity (GO:0004864);; Biological Process: defense response (GO:0006952);; Biological Process: abscisic acid-activated signaling pathway (GO:0009738);; Molecular Function: abscisic acid binding (GO:0010427);; Molecular Function: signaling receptor activity (GO:0038023);;	K05387|2.0e-11|peq:110030824|K05387 glutamate receptor, ionotropic, plant | (RefSeq) LOW QUALITY PROTEIN: glutamate receptor 2.3-like	--	--	--	Pathogenesis-related protein Bet v 1 family	Major allergen Pru ar 1 OS=Prunus armeniaca OX=36596 PE=1 SV=1	S	Function unknown	Major allergen Pru ar like [Actinidia chinensis var. chinensis]
gene-CEY00_Acc10239	23	17	11	65	63	60	0.511425	0.385098	0.214965	1.33319	1.41948	1.01201	1.2e-05	1.16102	up	--	--	Molecular Function: protein dimerization activity (GO:0046983);;	K13422|4.5e-14|ats:109750771|K13422 transcription factor MYC2 | (RefSeq) LOC109750771; transcription factor MYC2-like	MAPK signaling pathway - plant (ko04016);; Plant hormone signal transduction (ko04075)	--	--	Helix-loop-helix DNA-binding domain	Transcription factor bHLH25 OS=Arabidopsis thaliana OX=3702 GN=BHLH25 PE=2 SV=2	K	Transcription	Transcription factor bHLH25 like [Actinidia chinensis var. chinensis]
gene-CEY00_Acc20627	634	570	601	2633	1976	2645	10.3479	9.42931	9.1696	39.1599	32.1725	32.6362	9.84e-69	1.80296	up	--	--	Molecular Function: catechol oxidase activity (GO:0004097);; Biological Process: pigment biosynthetic process (GO:0046148);; Molecular Function: metal ion binding (GO:0046872);;	K00422|1.4e-235|ccav:112523496|K00422 polyphenol oxidase [EC:1.10.3.1] | (RefSeq) polyphenol oxidase, chloroplastic-like	Tyrosine metabolism (ko00350);; Isoquinoline alkaloid biosynthesis (ko00950)	--	--	Protein of unknown function (DUF_B2219)	Polyphenol oxidase, chloroplastic OS=Malus domestica OX=3750 PE=1 SV=1	S	Function unknown	Polyphenol oxidase [Actinidia chinensis var. chinensis]
gene-CEY00_Acc32619	1376	1448	1442	599	621	757	20.057	21.37	19.6274	7.93807	9.02108	8.32328	1.48e-34	-1.18929	down	[G]	Carbohydrate transport and metabolism	Biological Process: carbohydrate metabolic process (GO:0005975);; Molecular Function: intramolecular transferase activity, phosphotransferases (GO:0016868);;	--	--	[G]	Carbohydrate transport and metabolism	Phosphoglucomutase/phosphomannomutase, alpha/beta/alpha domain I	--	G	Carbohydrate transport and metabolism	Phosphomannomutase/phosphoglucomutase [Actinidia chinensis var. chinensis]
gene-CEY00_Acc09428	1576	1670	1623	4159	3380	4708	57.4155	61.5855	55.1912	137.863	122.686	129.476	1.03e-42	1.16772	up	--	--	--	--	--	--	--	--	--	S	Function unknown	Jasmonate-induced protein [Actinidia chinensis var. chinensis]
gene-CEY00_Acc11281	25	35	29	108	64	97	0.88134	1.24317	0.960395	3.47074	2.23917	2.59864	9.3e-06	1.08534	up	--	--	Molecular Function: peptidase activity (GO:0008233);;	--	--	--	--	Peptidase of plants and bacteria	Basic secretory protease (Fragments) OS=Boswellia serrata OX=613112 PE=1 SV=1	S	Function unknown	Basic secretory protease [Actinidia chinensis var. chinensis]
gene-CEY00_Acc33660	67	67	53	214	174	215	0.631563	0.63283	0.459824	1.83282	1.62692	1.52465	5.31e-13	1.34484	up	--	--	--	K23533|1.4e-34|nta:107799167|K23533 leucine-rich repeat and immunoglobulin-like domain-containing nogo receptor-interacting protein | (RefSeq) disease resistance protein TAO1-like	--	--	--	--	--	S	Function unknown	Disease resistance protein like [Actinidia chinensis var. chinensis]
gene-CEY00_Acc28853	19	28	29	305	252	270	0.61805	0.948183	0.886199	9.34554	8.45629	6.87943	9.31e-44	2.71563	up	--	--	--	K12173|2.3e-22|gmx:100794341|K12173 BRCA1-A complex subunit BRE | (RefSeq) BRISC and BRCA1-A complex member 2	Homologous recombination (ko03440)	--	--	Thaumatin family	Thaumatin-like protein OS=Actinidia deliciosa OX=3627 GN=tlp PE=1 SV=2	S	Function unknown	Thaumatin-like protein [Actinidia chinensis var. chinensis]
gene-CEY00_Acc15359	3	2	2	131	82	93	0.071106	0.071497	0.053333	4.23692	2.88562	2.47568	5.2e-27	2.72823	up	--	--	--	--	--	--	--	VQ motif	VQ motif-containing protein 22 OS=Arabidopsis thaliana OX=3702 GN=VQ22 PE=2 SV=1	S	Function unknown	VQ motif-containing protein [Actinidia chinensis var. chinensis]
gene-CEY00_Acc32390	1588	1654	1805	652	604	745	26.9167	28.3874	28.5634	10.0488	10.2005	9.53565	1.97e-52	-1.40856	down	[QV]	Secondary metabolites biosynthesis, transport and catabolism;; Defense mechanisms	Molecular Function: monooxygenase activity (GO:0004497);; Molecular Function: iron ion binding (GO:0005506);; Molecular Function: oxidoreductase activity, acting on paired donors, with incorporation or reduction of molecular oxygen (GO:0016705);; Molecular Function: heme binding (GO:0020037);;	K13083|7.4e-241|egr:104433887|K13083 flavonoid 3',5'-hydroxylase [EC:1.14.14.81] | (RefSeq) flavonoid 3',5'-hydroxylase 2	Flavonoid biosynthesis (ko00941);; Flavone and flavonol biosynthesis (ko00944)	[Q]	Secondary metabolites biosynthesis, transport and catabolism	Cytochrome P450	Flavonoid 3',5'-hydroxylase 1 OS=Petunia hybrida OX=4102 GN=CYP75A1 PE=1 SV=1	Q	Secondary metabolites biosynthesis, transport and catabolism	Flavonoid 3',5'-hydroxylase [Actinidia chinensis var. chinensis]
gene-CEY00_Acc08492	7	21	16	79	61	72	0.10229	0.313024	0.211462	1.06497	0.900007	0.801868	1.22e-07	1.38405	up	--	--	Molecular Function: calmodulin binding (GO:0005516);; Biological Process: defense response (GO:0006952);; Biological Process: response to biotic stimulus (GO:0009607);; Cellular Component: integral component of membrane (GO:0016021);;	K08472|3.1e-193|egr:104427912|K08472 mlo protein | (RefSeq) MLO-like protein 3	--	--	--	Mlo family	MLO-like protein 3 OS=Arabidopsis thaliana OX=3702 GN=MLO3 PE=2 SV=1	G	Carbohydrate transport and metabolism	MLO-like protein [Actinidia chinensis var. chinensis]
gene-CEY00_Acc31185	3953	3697	3658	2110	1605	1841	186.99	177.053	161.497	90.82	75.6425	65.7303	3.33e-22	-1.08629	down	--	--	Biological Process: defense response (GO:0006952);;	--	--	--	--	Pathogenesis-related protein Bet v 1 family	Kirola OS=Actinidia deliciosa OX=3627 PE=1 SV=1	S	Function unknown	Kirola like [Actinidia chinensis var. chinensis]
gene-CEY00_Acc29258	0	0	0	44	40	43	0	0	0	0.92121	0.907259	0.743961	3.62e-14	2.02958	up	--	--	Molecular Function: DNA binding (GO:0003677);;	K09422|6.9e-98|vvi:100242243|K09422 transcription factor MYB, plant | (RefSeq) transcription factor MYB108	--	[K]	Transcription	Myb-like DNA-binding domain	Transcription factor MYB62 OS=Arabidopsis thaliana OX=3702 GN=MYB62 PE=2 SV=1	--	--	Transcription factor like [Actinidia chinensis var. chinensis]
gene-CEY00_Acc05626	189	178	225	79	71	114	6.04582	5.77193	6.72222	2.28942	2.25726	2.74439	1.74e-10	-1.13841	down	[H]	Coenzyme transport and metabolism	Molecular Function: methyltransferase activity (GO:0008168);; Biological Process: methylation (GO:0032259);;	--	--	[IR]	Lipid transport and metabolism;; General function prediction only	Methyltransferase domain	--	I	Lipid transport and metabolism	Methyltransferase-like protein [Actinidia chinensis var. chinensis]
gene-CEY00_Acc06791	35	40	52	183	163	195	0.885138	1.02629	1.24196	4.30019	4.19621	3.80671	4.17e-17	1.64637	up	[Q]	Secondary metabolites biosynthesis, transport and catabolism	Molecular Function: oxidoreductase activity (GO:0016491);; Molecular Function: metal ion binding (GO:0046872);;	K24028|2.6e-91|adu:107460505|K24028 salicylic acid 3-hydroxylase [EC:1.14.11.-] | (RefSeq) protein DMR6-LIKE OXYGENASE 1	--	[QR]	Secondary metabolites biosynthesis, transport and catabolism;; General function prediction only	2OG-Fe(II) oxygenase superfamily	2-oxoglutarate-dependent dioxygenase 19 OS=Oryza sativa subsp. japonica OX=39947 GN=2ODD19 PE=1 SV=1	Q	Secondary metabolites biosynthesis, transport and catabolism	Protein DMR6-LIKE OXYGENASE 1 like [Actinidia chinensis var. chinensis]
gene-CEY00_Acc08970	2043	2157	2422	4691	4362	5691	42.7553	45.6995	47.3009	89.3225	90.9549	89.914	1.82e-33	1.00262	up	[Q]	Secondary metabolites biosynthesis, transport and catabolism	Biological Process: biosynthetic process (GO:0009058);; Molecular Function: transferase activity, transferring acyl groups other than amino-acyl groups (GO:0016747);;	K00660|3.6e-211|dzi:111279241|K00660 chalcone synthase [EC:2.3.1.74] | (RefSeq) chalcone synthase 1	Flavonoid biosynthesis (ko00941);; Circadian rhythm - plant (ko04712)	--	--	Chalcone and stilbene synthases, N-terminal domain	Chalcone synthase 2 OS=Camellia sinensis OX=4442 GN=CHS2 PE=2 SV=1	H	Coenzyme transport and metabolism	Chalcone synthase [Actinidia chinensis var. chinensis]
gene-CEY00_Acc10407	313	311	343	767	667	923	2.70089	2.71647	2.76126	6.03357	5.74485	6.02296	6.63e-24	1.10421	up	[T]	Signal transduction mechanisms	Molecular Function: protein kinase activity (GO:0004672);; Molecular Function: ATP binding (GO:0005524);; Cellular Component: integral component of membrane (GO:0016021);;	K13415|5.1e-48|pda:103696970|K13415 protein brassinosteroid insensitive 1 [EC:2.7.10.1 2.7.11.1] | (RefSeq) brassinosteroid LRR receptor kinase BRI1-like	Plant hormone signal transduction (ko04075)	--	--	Leucine rich repeat	Probable LRR receptor-like serine/threonine-protein kinase At4g36180 OS=Arabidopsis thaliana OX=3702 GN=At4g36180 PE=1 SV=1	T	Signal transduction mechanisms	LRR receptor-like serine/threonine-protein kinase [Actinidia chinensis var. chinensis]
gene-CEY00_Acc19465	471	461	500	1716	1585	2102	7.08505	7.02078	7.01351	23.4922	23.7683	23.876	2.77e-82	1.73124	up	[IQ]	Lipid transport and metabolism;; Secondary metabolites biosynthesis, transport and catabolism	Biological Process: cell morphogenesis (GO:0000902);; Molecular Function: molecular_function (GO:0003674);; Molecular Function: catalytic activity (GO:0003824);; Cellular Component: cellular_component (GO:0005575);; Cellular Component: intracellular (GO:0005622);; Cellular Component: cell (GO:0005623);; Cellular Component: cytoplasm (GO:0005737);; Biological Process: cellular aromatic compound me…	K14487|0.0e+00|rcu:8287873|K14487 auxin responsive GH3 gene family | (RefSeq) indole-3-acetic acid-amido synthetase GH3.6	Plant hormone signal transduction (ko04075)	--	--	GH3 auxin-responsive promoter	Indole-3-acetic acid-amido synthetase GH3.6 OS=Arabidopsis thaliana OX=3702 GN=GH3.6 PE=1 SV=1	S	Function unknown	Indole-3-acetic acid-amido synthetase [Actinidia chinensis var. chinensis]
gene-CEY00_Acc14115	39	50	50	126	143	175	0.856962	1.11083	1.0252	2.54744	3.17009	2.93816	4.19e-10	1.28062	up	--	--	Molecular Function: peroxidase activity (GO:0004601);; Cellular Component: extracellular region (GO:0005576);; Biological Process: response to oxidative stress (GO:0006979);; Molecular Function: heme binding (GO:0020037);; Biological Process: hydrogen peroxide catabolic process (GO:0042744);; Molecular Function: metal ion binding (GO:0046872);;	K00430|2.5e-152|dcr:108194458|K00430 peroxidase [EC:1.11.1.7] | (RefSeq) peroxidase 11	Phenylpropanoid biosynthesis (ko00940)	--	--	Peroxidase	Peroxidase 11 OS=Arabidopsis thaliana OX=3702 GN=PER11 PE=1 SV=1	Q	Secondary metabolites biosynthesis, transport and catabolism	Peroxidase [Actinidia chinensis var. chinensis]
gene-CEY00_Acc11382	45	28	37	520	291	297	1.54622	0.957642	1.19003	16.4971	10.1246	7.83087	2.59e-32	2.51676	up	--	--	--	--	--	--	--	Extensin-like region	--	--	--	Histidine-rich glycoprotein [Actinidia chinensis var. chinensis]
Actinidia_chinensis_newGene_5156	181	176	174	77	78	99	1.55433	1.60826	1.33197	0.895678	0.639933	0.641836	3.9e-09	-1.04669	down	--	--	Molecular Function: nucleic acid binding (GO:0003676);; Molecular Function: zinc ion binding (GO:0008270);; Biological Process: DNA integration (GO:0015074);;	K15601|3.5e-55|psom:113331285|K15601 [histone H3]-dimethyl-L-lysine9 demethylase [EC:1.14.11.65] | (RefSeq) lysine-specific demethylase JMJ25-like	--	[R]	General function prediction only	Integrase core domain	Retrovirus-related Pol polyprotein from transposon RE1 OS=Arabidopsis thaliana OX=3702 GN=RE1 PE=2 SV=1	L	Replication, recombination and repair	hypothetical protein F0562_034198 [Nyssa sinensis]
gene-CEY00_Acc09332	9138	9323	9944	34285	27091	32955	171.907	177.542	174.613	586.876	507.809	467.996	1.17e-66	1.56144	up	[G]	Carbohydrate transport and metabolism	Molecular Function: hydrolase activity, hydrolyzing O-glycosyl compounds (GO:0004553);; Biological Process: carbohydrate metabolic process (GO:0005975);;	K01188|5.7e-209|vvi:100254458|K01188 beta-glucosidase [EC:3.2.1.21] | (RefSeq) beta-glucosidase 12-like	Cyanoamino acid metabolism (ko00460);; Starch and sucrose metabolism (ko00500);; Phenylpropanoid biosynthesis (ko00940)	[G]	Carbohydrate transport and metabolism	Glycosyl hydrolase family 1	Beta-glucosidase 12 OS=Oryza sativa subsp. indica OX=39946 GN=BGLU12 PE=3 SV=1	G	Carbohydrate transport and metabolism	Beta-glucosidase [Actinidia chinensis var. chinensis]
gene-CEY00_Acc23046	98	98	78	241	200	277	1.88893	1.90377	1.39888	4.23562	3.85076	4.03205	9.3e-11	1.1153	up	--	--	Molecular Function: DNA binding (GO:0003677);; Cellular Component: nucleus (GO:0005634);;	K09422|2.6e-80|jre:109000849|K09422 transcription factor MYB, plant | (RefSeq) transcription factor MYB52-like	--	[K]	Transcription	Myb-like DNA-binding domain	Transcription factor CSA OS=Oryza sativa subsp. japonica OX=39947 GN=CSA PE=2 SV=2	K	Transcription	Transcription factor like [Actinidia chinensis var. chinensis]
gene-CEY00_Acc19137	97	98	123	377	446	480	2.94578	3.01913	3.4949	10.461	13.5568	11.0563	7.38e-29	1.73038	up	--	--	Cellular Component: cellular_component (GO:0005575);; Cellular Component: extracellular region (GO:0005576);; Cellular Component: cell wall (GO:0005618);; Cellular Component: intracellular (GO:0005622);; Cellular Component: cell (GO:0005623);; Cellular Component: cytoplasm (GO:0005737);; Cellular Component: vacuole (GO:0005773);; Cellular Component: vacuolar membrane (GO:0005774);; Cellular Compo…	--	--	--	--	--	EP1-like glycoprotein 3 OS=Arabidopsis thaliana OX=3702 GN=At1g78850 PE=1 SV=1	S	Function unknown	Epidermis-specific secreted glycoprotein [Actinidia chinensis var. chinensis]
gene-CEY00_Acc18615	25	43	29	173	133	198	0.943382	1.6639	1.04216	6.06997	5.1239	5.77082	9.92e-18	1.79695	up	--	--	Molecular Function: endopeptidase inhibitor activity (GO:0004866);;	--	--	--	--	Trypsin and protease inhibitor	Miraculin OS=Synsepalum dulcificum OX=3743 PE=1 SV=3	S	Function unknown	Miraculin like [Actinidia chinensis var. chinensis]
gene-CEY00_Acc29921	73	69	61	28	15	36	1.19672	1.14777	0.928697	0.405749	0.236475	0.441046	2.2e-05	-1.07676	down	--	--	Molecular Function: protein dimerization activity (GO:0046983);;	K16189|6.1e-57|psom:113281592|K16189 phytochrome-interacting factor 4 | (RefSeq) transcription factor PIF4-like isoform X1	Plant hormone signal transduction (ko04075)	--	--	Helix-loop-helix DNA-binding domain	Transcription factor PIF1 OS=Arabidopsis thaliana OX=3702 GN=PIF1 PE=1 SV=1	K	Transcription	Transcription factor like [Actinidia chinensis var. chinensis]
gene-CEY00_Acc10164	57	69	58	237	180	188	1.65054	2.01668	1.54439	6.25228	5.20165	4.11675	9.78e-12	1.34621	up	--	--	Cellular Component: nucleus (GO:0005634);; Biological Process: regulation of transcription, DNA-templated (GO:0006355);; Molecular Function: sequence-specific DNA binding (GO:0043565);;	K09338|2.3e-86|vvi:100265773|K09338 homeobox-leucine zipper protein | (RefSeq) homeobox-leucine zipper protein HOX11	--	[K]	Transcription	Homeodomain	Homeobox-leucine zipper protein HAT14 OS=Arabidopsis thaliana OX=3702 GN=HAT14 PE=2 SV=3	K	Transcription	Homeobox-leucine zipper protein [Actinidia chinensis var. chinensis]
gene-CEY00_Acc27730	123	130	124	498	318	382	2.40403	2.56726	2.2581	8.87021	6.20765	5.6398	2.02e-15	1.36781	up	--	--	Molecular Function: aspartic-type endopeptidase activity (GO:0004190);;	K22683|4.8e-39|gmx:100808163|K22683 aspartyl protease family protein [EC:3.4.23.-] | (RefSeq) aspartyl protease family protein 2	--	[O]	Posttranslational modification, protein turnover, chaperones	Xylanase inhibitor N-terminal	Aspartic proteinase PCS1 OS=Arabidopsis thaliana OX=3702 GN=PCS1 PE=2 SV=1	O	Posttranslational modification, protein turnover, chaperones	Aspartic proteinase [Actinidia chinensis var. chinensis]
gene-CEY00_Acc31318	11	19	14	80	47	65	0.272285	0.497367	0.335954	1.89805	1.2104	1.28102	1.22e-06	1.28357	up	--	--	Molecular Function: DNA binding (GO:0003677);;	K09422|1.2e-86|qsu:112040952|K09422 transcription factor MYB, plant | (RefSeq) transcription factor MYB62-like	--	[K]	Transcription	Myb-like DNA-binding domain	Transcription factor MYB62 OS=Arabidopsis thaliana OX=3702 GN=MYB62 PE=2 SV=1	--	--	Transcription factor like [Actinidia chinensis var. chinensis]
gene-CEY00_Acc06866	118	106	104	393	385	512	5.55789	5.03671	4.56649	16.9014	18.1384	18.3003	1.36e-32	1.6951	up	[S]	Function unknown	Cellular Component: extracellular region (GO:0005576);;	K13449|1.9e-65|vvi:100246419|K13449 pathogenesis-related protein 1 | (RefSeq) PR-1, PR1; pathogenesis-related protein 1	MAPK signaling pathway - plant (ko04016);; Plant hormone signal transduction (ko04075);; Plant-pathogen interaction (ko04626)	[S]	Function unknown	Cysteine-rich secretory protein family	Pathogenesis-related protein PR-1 type OS=Sambucus nigra OX=4202 PE=2 SV=1	S	Function unknown	Pathogenesis-related protein PR-1 type like [Actinidia chinensis var. chinensis]
gene-CEY00_Acc10128	85	85	120	222	243	350	1.61052	1.63013	2.13129	3.84611	4.60158	5.02736	2.13e-11	1.19009	up	[T]	Signal transduction mechanisms	Molecular Function: magnesium ion binding (GO:0000287);; Molecular Function: pyruvate kinase activity (GO:0004743);; Molecular Function: kinase activity (GO:0016301);; Molecular Function: potassium ion binding (GO:0030955);;	K00873|1.9e-244|vvi:100265797|K00873 pyruvate kinase [EC:2.7.1.40] | (RefSeq) pyruvate kinase, cytosolic isozyme	Glycolysis / Gluconeogenesis (ko00010);; Purine metabolism (ko00230);; Pyruvate metabolism (ko00620);; Carbon metabolism (ko01200);; Biosynthesis of amino acids (ko01230)	[G]	Carbohydrate transport and metabolism	Pyruvate kinase, barrel domain	Pyruvate kinase, cytosolic isozyme OS=Nicotiana tabacum OX=4097 PE=2 SV=1	G	Carbohydrate transport and metabolism	Pyruvate kinase [Actinidia chinensis var. chinensis]
gene-CEY00_Acc16462	37	34	62	245	235	253	0.811802	0.753873	1.27385	4.93209	5.16412	4.21791	3.52e-24	1.96207	up	[Q]	Secondary metabolites biosynthesis, transport and catabolism	Molecular Function: oxidoreductase activity (GO:0016491);; Molecular Function: metal ion binding (GO:0046872);;	K13229|2.0e-78|sita:101778204|K13229 2,4-dihydroxy-1,4-benzoxazin-3-one-glucoside dioxygenase [EC:1.14.11.59] | (RefSeq) DIBOA-glucoside dioxygenase BX6	Benzoxazinoid biosynthesis (ko00402)	[QR]	Secondary metabolites biosynthesis, transport and catabolism;; General function prediction only	2OG-Fe(II) oxygenase superfamily	1-aminocyclopropane-1-carboxylate oxidase homolog 1 OS=Arabidopsis thaliana OX=3702 GN=At1g06620 PE=2 SV=1	Q	Secondary metabolites biosynthesis, transport and catabolism	1-aminocyclopropane-1-carboxylate oxidase [Actinidia chinensis var. chinensis]
gene-CEY00_Acc12057	109	64	80	1037	1205	811	2.41738	1.4251	1.64682	20.9542	26.654	13.5973	3.19e-20	2.29373	up	[O]	Posttranslational modification, protein turnover, chaperones	Molecular Function: cysteine-type peptidase activity (GO:0008234);;	K16290|4.8e-88|nnu:104606845|K16290 xylem cysteine proteinase [EC:3.4.22.-] | (RefSeq) cysteine protease XCP1	--	[O]	Posttranslational modification, protein turnover, chaperones	Papain family cysteine protease	Actinidain OS=Actinidia deliciosa OX=3627 PE=1 SV=1	O	Posttranslational modification, protein turnover, chaperones	Actinidain like [Actinidia chinensis var. chinensis]
gene-CEY00_Acc09334	15	14	14	54	40	52	0.268987	0.253502	0.226005	0.90716	0.72417	0.725902	0.000129279	1.04393	up	[G]	Carbohydrate transport and metabolism	Molecular Function: hydrolase activity, hydrolyzing O-glycosyl compounds (GO:0004553);; Biological Process: carbohydrate metabolic process (GO:0005975);;	K01188|7.5e-217|vvi:100254458|K01188 beta-glucosidase [EC:3.2.1.21] | (RefSeq) beta-glucosidase 12-like	Cyanoamino acid metabolism (ko00460);; Starch and sucrose metabolism (ko00500);; Phenylpropanoid biosynthesis (ko00940)	[G]	Carbohydrate transport and metabolism	Glycosyl hydrolase family 1	Beta-glucosidase 12 OS=Oryza sativa subsp. indica OX=39946 GN=BGLU12 PE=3 SV=1	G	Carbohydrate transport and metabolism	Beta-glucosidase [Actinidia chinensis var. chinensis]
gene-CEY00_Acc23373	37	29	29	129	90	98	0.576077	0.454749	0.428017	1.85514	1.42479	1.17504	1.62e-07	1.23175	up	[QV]	Secondary metabolites biosynthesis, transport and catabolism;; Defense mechanisms	Molecular Function: monooxygenase activity (GO:0004497);; Molecular Function: iron ion binding (GO:0005506);; Cellular Component: integral component of membrane (GO:0016021);; Molecular Function: oxidoreductase activity, acting on paired donors, with incorporation or reduction of molecular oxygen (GO:0016705);; Molecular Function: heme binding (GO:0020037);;	K07425|3.3e-162|ccaj:109816127|K07425 long-chain fatty acid omega-monooxygenase [EC:1.14.14.80] | (RefSeq) cytochrome P450 CYP72A219-like isoform X1	Fatty acid degradation (ko00071);; Arachidonic acid metabolism (ko00590)	[QI]	Secondary metabolites biosynthesis, transport and catabolism;; Lipid transport and metabolism	Cytochrome P450	Cytochrome P450 72A15 OS=Arabidopsis thaliana OX=3702 GN=CYP72A15 PE=2 SV=1	Q	Secondary metabolites biosynthesis, transport and catabolism	11-oxo-beta-amyrin 30-oxidase [Actinidia chinensis var. chinensis]
Actinidia_chinensis_newGene_4034	51	89	62	25	19	29	2.52643	4.5099	2.90879	1.1142	0.943317	1.09795	1.76e-05	-1.1102	down	--	--	Biological Process: proteasome assembly (GO:0043248);;	K11599|1.8e-20|jre:108984544|K11599 proteasome maturation protein | (RefSeq) cyclin-B1-2-like	Proteasome (ko03050)	[O]	Posttranslational modification, protein turnover, chaperones	Proteasome maturation factor UMP1	--	O	Posttranslational modification, protein turnover, chaperones	cyclin-B1-2-like [Juglans regia]
gene-CEY00_Acc04996	18	38	41	101	71	104	0.360004	0.801305	0.796299	1.90646	1.46192	1.6208	5.97e-05	1.00708	up	[D]	Cell cycle control, cell division, chromosome partitioning	Molecular Function: ubiquitin-protein transferase activity (GO:0004842);;	--	--	--	--	U-box domain	U-box domain-containing protein 28 OS=Arabidopsis thaliana OX=3702 GN=PUB28 PE=1 SV=1	H	Coenzyme transport and metabolism	U-box domain-containing protein [Actinidia chinensis var. chinensis]
gene-CEY00_Acc29041	60	64	57	150	156	214	0.645805	0.695621	0.575055	1.48311	1.69294	1.75838	4.74e-10	1.18858	up	[R]	General function prediction only	Biological Process: defense response (GO:0006952);; Molecular Function: ADP binding (GO:0043531);;	K13457|5.8e-260|tcc:18606852|K13457 disease resistance protein RPM1 | (RefSeq) disease resistance protein RPM1	Plant-pathogen interaction (ko04626)	[T]	Signal transduction mechanisms	NB-ARC domain	Disease resistance protein RPM1 OS=Arabidopsis thaliana OX=3702 GN=RPM1 PE=1 SV=1	T	Signal transduction mechanisms	Disease resistance protein [Actinidia chinensis var. chinensis]
gene-CEY00_Acc10936	1039	950	987	481	430	586	7.89253	7.3079	7.00433	3.32689	3.25578	3.36306	8.62e-27	-1.07692	down	[T]	Signal transduction mechanisms	Cellular Component: integral component of membrane (GO:0016021);; Molecular Function: oxidoreductase activity (GO:0016491);;	K00521|2.1e-289|tcc:18586305|K00521 ferric-chelate reductase [EC:1.16.1.7] | (RefSeq) ferric reduction oxidase 7, chloroplastic	--	[PQ]	Inorganic ion transport and metabolism;; Secondary metabolites biosynthesis, transport and catabolism	FAD-binding domain	Ferric reduction oxidase 6 OS=Arabidopsis thaliana OX=3702 GN=FRO6 PE=2 SV=1	--	--	Ferric reduction oxidase [Actinidia chinensis var. chinensis]
gene-CEY00_Acc22911	336	335	427	186	132	193	5.527	5.5853	6.56552	2.79018	2.15524	2.40002	1.51e-13	-1.12178	down	[G]	Carbohydrate transport and metabolism	Molecular Function: polygalacturonase activity (GO:0004650);; Cellular Component: extracellular region (GO:0005576);; Biological Process: carbohydrate metabolic process (GO:0005975);; Biological Process: cell wall organization (GO:0071555);;	K01213|7.4e-150|aip:107645968|K01213 galacturan 1,4-alpha-galacturonidase [EC:3.2.1.67] | (RefSeq) polygalacturonase At1g48100-like	Pentose and glucuronate interconversions (ko00040)	--	--	Glycosyl hydrolases family 28	Polygalacturonase At1g48100 OS=Arabidopsis thaliana OX=3702 GN=At1g48100 PE=2 SV=1	G	Carbohydrate transport and metabolism	Polygalacturonase [Actinidia chinensis var. chinensis]
gene-CEY00_Acc01374	22	19	20	72	56	67	0.768788	0.641484	0.641731	2.27884	1.93455	1.75893	2.1e-05	1.09108	up	--	--	Cellular Component: integral component of membrane (GO:0016021);;	--	--	--	--	Late embryogenesis abundant protein	--	S	Function unknown	Late embryogenesis abundant protein [Actinidia chinensis var. chinensis]
gene-CEY00_Acc23803	9	10	11	64	55	107	0.25076	0.273413	0.297095	1.7002	1.5946	2.35701	7.67e-12	1.75085	up	--	--	--	--	--	[R]	General function prediction only	C2H2-type zinc finger	Zinc finger protein ZAT6 OS=Arabidopsis thaliana OX=3702 GN=ZAT6 PE=2 SV=1	S	Function unknown	Zinc finger protein [Actinidia chinensis var. chinensis]
gene-CEY00_Acc30746	119	109	176	51	57	69	3.04075	2.81601	4.21523	1.1804	1.44146	1.33092	6.96e-07	-1.06733	down	[K]	Transcription	--	K07735|7.3e-103|gab:108453995|K07735 putative transcriptional regulator | (RefSeq) UPF0301 protein BF2109-like	--	--	--	Uncharacterized ACR, COG1678	--	S	Function unknown	UPF0301 protein like [Actinidia chinensis var. chinensis]
gene-CEY00_Acc26605	155	162	203	74	66	89	3.28303	3.46906	4.00315	1.41952	1.38546	1.41189	9.59e-10	-1.13286	down	--	--	Cellular Component: nucleus (GO:0005634);; Molecular Function: zinc ion binding (GO:0008270);;	K12135|7.8e-10|csat:104769830|K12135 zinc finger protein CONSTANS | (RefSeq) zinc finger protein CONSTANS-like	Circadian rhythm - plant (ko04712)	[K]	Transcription	CCT motif	Zinc finger protein CONSTANS-LIKE 16 OS=Arabidopsis thaliana OX=3702 GN=COL16 PE=1 SV=2	K	Transcription	Zinc finger protein like [Actinidia chinensis var. chinensis]
gene-CEY00_Acc01592	1071	1001	886	462	405	680	17.5667	16.6274	13.5714	6.88593	6.61532	8.41647	1.65e-15	-1.01396	down	--	--	Biological Process: reproduction (GO:0000003);; Biological Process: response to acid chemical (GO:0001101);; Biological Process: defense response to insect (GO:0002213);; Biological Process: immune system process (GO:0002376);; Biological Process: developmental process involved in reproduction (GO:0003006);; Biological Process: proteolysis (GO:0006508);; Biological Process: ubiquitin-dependent pr…	K13463|6.5e-169|tcc:18585944|K13463 coronatine-insensitive protein 1 | (RefSeq) coronatine-insensitive protein 1	Plant hormone signal transduction (ko04075)	[R]	General function prediction only	Transport inhibitor response 1 protein domain	Coronatine-insensitive protein 1 OS=Arabidopsis thaliana OX=3702 GN=COI1 PE=1 SV=1	S	Function unknown	Coronatine-insensitive protein [Actinidia chinensis var. chinensis]
gene-CEY00_Acc03953	434	372	433	985	1011	1184	10.6387	9.22359	9.90688	21.9873	24.7021	21.9261	2.14e-27	1.18386	up	--	--	Molecular Function: hydrolase activity, hydrolyzing O-glycosyl compounds (GO:0004553);; Biological Process: carbohydrate metabolic process (GO:0005975);;	K19893|5.1e-55|vvi:100251609|K19893 glucan endo-1,3-beta-glucosidase 5/6 [EC:3.2.1.39] | (RefSeq) glucan endo-1,3-beta-glucosidase 6	Starch and sucrose metabolism (ko00500)	--	--	Glycosyl hydrolases family 17	Glucan endo-1,3-beta-glucosidase, acidic isoform PR-Q' OS=Nicotiana tabacum OX=4097 PE=1 SV=1	G	Carbohydrate transport and metabolism	Glucan endo-1,3-beta-glucosidase [Actinidia chinensis var. chinensis]
gene-CEY00_Acc04386	332	267	326	109	75	133	22.6625	18.429	20.7673	6.72776	5.06184	6.82167	1.48e-20	-1.50355	down	--	--	Cellular Component: chloroplast (GO:0009507);;	K12198|3.9e-24|sita:101765827|K12198 charged multivesicular body protein 5 | (RefSeq) vacuolar protein sorting-associated protein 60.1	Endocytosis (ko04144)	--	--	Light regulated protein Lir1	Light-regulated protein 1, chloroplastic OS=Arabidopsis thaliana OX=3702 GN=LIR1 PE=1 SV=1	S	Function unknown	Light-regulated protein [Actinidia chinensis var. chinensis]
gene-CEY00_Acc24937	73	45	52	181	127	153	1.50363	0.943928	1.00699	3.42463	2.63773	2.40318	6.79e-07	1.07336	up	--	--	Molecular Function: protein binding (GO:0005515);;	K01188|4.5e-13|sita:101778196|K01188 beta-glucosidase [EC:3.2.1.21] | (RefSeq) beta-glucosidase 12	Cyanoamino acid metabolism (ko00460);; Starch and sucrose metabolism (ko00500);; Phenylpropanoid biosynthesis (ko00940)	--	--	Leucine Rich repeats (2 copies)	Polygalacturonase inhibitor OS=Pyrus communis OX=23211 GN=PGIP PE=1 SV=1	--	--	Polygalacturonase inhibitor 1 like [Actinidia chinensis var. chinensis]
gene-CEY00_Acc00453	125	132	131	348	260	317	2.24303	2.39685	2.20146	5.70612	4.66811	4.30191	2.71e-10	1.02187	up	--	--	Molecular Function: DNA binding (GO:0003677);; Cellular Component: nucleus (GO:0005634);; Cellular Component: host cell nucleus (GO:0042025);; Molecular Function: metal ion binding (GO:0046872);;	K13415|5.1e-19|mdm:103413440|K13415 protein brassinosteroid insensitive 1 [EC:2.7.10.1 2.7.11.1] | (RefSeq) uncharacterized protein LOC103413440 isoform X1	Plant hormone signal transduction (ko04075)	--	--	SBP domain	Squamosa promoter-binding-like protein 7 OS=Oryza sativa subsp. japonica OX=39947 GN=SPL7 PE=2 SV=2	S	Function unknown	Squamosa promoter-binding-like protein [Actinidia chinensis var. chinensis]
gene-CEY00_Acc04291	5	6	10	148	143	188	0.072783	0.090026	0.156871	2.36361	2.50243	2.49613	1.29e-39	3.0059	up	[G]	Carbohydrate transport and metabolism	Biological Process: carbohydrate transport (GO:0008643);; Cellular Component: integral component of membrane (GO:0016021);; Molecular Function: transmembrane transporter activity (GO:0022857);;	K24193|1.3e-256|oeu:111369468|K24193 MFS transporter, SP family, sugar:H+ symporter | (RefSeq) sugar transport protein 13-like	--	[R]	General function prediction only	Sugar (and other) transporter	Sugar transport protein 13 OS=Arabidopsis thaliana OX=3702 GN=STP13 PE=1 SV=2	U	Intracellular trafficking, secretion, and vesicular transport	Sugar transport protein [Actinidia chinensis var. chinensis]
gene-CEY00_Acc18941	12	16	9	58	41	40	0.450551	0.585403	0.319161	2.00423	1.52776	1.13193	0.000166153	1.0543	up	--	--	Molecular Function: electron carrier activity (GO:0009055);; Molecular Function: protein disulfide oxidoreductase activity (GO:0015035);;	K03676|5.6e-35|mesc:110605518|K03676 glutaredoxin 3 | (RefSeq) glutaredoxin-C9-like	--	[O]	Posttranslational modification, protein turnover, chaperones	Glutaredoxin	Glutaredoxin-C9 OS=Arabidopsis thaliana OX=3702 GN=GRXC9 PE=1 SV=1	O	Posttranslational modification, protein turnover, chaperones	Glutaredoxin-C9 like [Actinidia chinensis var. chinensis]
gene-CEY00_Acc11534	33	35	29	167	91	128	0.553837	0.607191	0.448959	2.59885	1.54177	1.65474	7.33e-10	1.42025	up	--	--	Cellular Component: integral component of membrane (GO:0016021);;	K14209|4.9e-08|peq:110033165|K14209 solute carrier family 36 (proton-coupled amino acid transporter) | (RefSeq) amino acid transporter ANTL3-like	--	[E]	Amino acid transport and metabolism	Transmembrane amino acid transporter protein	Amino acid permease 3 OS=Arabidopsis thaliana OX=3702 GN=AAP3 PE=1 SV=2	E	Amino acid transport and metabolism	Amino acid permease [Actinidia chinensis var. chinensis]
gene-CEY00_Acc04212	1992	1861	1871	676	809	1013	64.4407	60.9624	56.4945	19.8949	26.0636	24.7324	1.91e-30	-1.2621	down	--	--	Cellular Component: nucleus (GO:0005634);; Biological Process: regulation of transcription, DNA-templated (GO:0006355);; Biological Process: auxin-activated signaling pathway (GO:0009734);;	K14484|5.3e-98|vvi:100254530|K14484 auxin-responsive protein IAA | (RefSeq) auxin-responsive protein IAA14	Plant hormone signal transduction (ko04075)	--	--	AUX/IAA family	Auxin-responsive protein IAA14 OS=Arabidopsis thaliana OX=3702 GN=IAA14 PE=1 SV=2	K	Transcription	Auxin-responsive protein [Actinidia chinensis var. chinensis]
gene-CEY00_Acc22763	1882	1832	1929	358	485	549	53.2891	52.5033	50.965	9.21238	13.6716	11.7318	6.52e-64	-2.01737	down	--	--	Cellular Component: nucleus (GO:0005634);; Biological Process: regulation of transcription, DNA-templated (GO:0006355);; Biological Process: auxin-activated signaling pathway (GO:0009734);;	K14484|1.1e-95|sind:105171637|K14484 auxin-responsive protein IAA | (RefSeq) auxin-responsive protein IAA14	Plant hormone signal transduction (ko04075)	--	--	AUX/IAA family	Auxin-responsive protein IAA14 OS=Arabidopsis thaliana OX=3702 GN=IAA14 PE=1 SV=2	K	Transcription	Auxin-responsive protein [Actinidia chinensis var. chinensis]
gene-CEY00_Acc13679	4519	4032	4544	1395	1992	2560	285.599	257.966	268.011	80.1883	125.398	122.121	2.39e-18	-1.18075	down	--	--	Molecular Function: molecular_function (GO:0003674);; Molecular Function: binding (GO:0005488);; Molecular Function: copper ion binding (GO:0005507);; Biological Process: cellular ion homeostasis (GO:0006873);; Biological Process: cellular metal ion homeostasis (GO:0006875);; Biological Process: cellular copper ion homeostasis (GO:0006878);; Biological Process: biological_process (GO:0008150);; M…	--	--	--	--	--	Metallothionein-like protein type 3 OS=Actinidia deliciosa OX=3627 GN=pKIWI503 PE=2 SV=1	S	Function unknown	Metallothionein-like protein [Actinidia chinensis var. chinensis]
gene-CEY00_Acc23835	494	463	424	1373	1036	1397	9.23302	8.75435	7.40145	23.3508	19.2949	19.7189	4.78e-28	1.2674	up	--	--	Molecular Function: ATP binding (GO:0005524);; Cellular Component: nucleus (GO:0005634);; Biological Process: transcription, DNA-templated (GO:0006351);; Biological Process: regulation of transcription, DNA-templated (GO:0006355);; Biological Process: developmental process (GO:0032502);;	K22382|9.5e-13|oeu:111408549|K22382 WD repeat-containing protein 26 | (RefSeq) WD repeat-containing protein 26 homolog	--	--	--	WRC	Growth-regulating factor 6 OS=Oryza sativa subsp. japonica OX=39947 GN=GRF6 PE=2 SV=2	K	Transcription	Growth-regulating factor like [Actinidia chinensis var. chinensis]
gene-CEY00_Acc27340	38	64	74	216	152	175	1.39649	2.37093	2.53872	7.26067	5.6158	4.8853	1.97e-08	1.21663	up	--	--	--	--	--	--	--	Probable lipid transfer	--	S	Function unknown	hypothetical protein CEY00_Acc27340 [Actinidia chinensis var. chinensis]
gene-CEY00_Acc13984	70	68	86	188	150	247	1.77713	1.76175	2.04834	4.35701	3.82362	4.75774	5.7e-09	1.08156	up	--	--	Molecular Function: methyltransferase activity (GO:0008168);; Biological Process: methylation (GO:0032259);;	K22546|4.6e-64|ath:AT3G44860|K22546 juvenile hormone-III synthase [EC:2.1.1.325] | (RefSeq) FAMT; farnesoic acid carboxyl-O-methyltransferase	--	--	--	SAM dependent carboxyl methyltransferase	Loganic acid O-methyltransferase OS=Catharanthus roseus OX=4058 GN=LAMT PE=1 SV=1	S	Function unknown	S-adenosylmethionine-dependent methyltransferase [Actinidia chinensis var. chinensis]
gene-CEY00_Acc02298	41	26	26	121	105	117	0.806879	0.511464	0.465452	2.16986	2.06229	1.74823	2.19e-09	1.36149	up	[HR]	Coenzyme transport and metabolism;; General function prediction only	--	K13544|1.4e-42|thj:104804464|K13544 pheophorbidase [EC:3.1.1.82] | (RefSeq) pheophorbidase isoform X1	Porphyrin and chlorophyll metabolism (ko00860)	--	--	Alpha/beta hydrolase family	Putative methylesterase 11, chloroplastic OS=Arabidopsis thaliana OX=3702 GN=MES11 PE=1 SV=1	S	Function unknown	Methylesterase 11 precursor [Actinidia chinensis var. chinensis]
gene-CEY00_Acc25970	197	201	203	598	605	803	6.35696	6.57331	6.09925	17.5688	19.4695	19.5762	1.06e-35	1.51631	up	--	--	Biological Process: response to auxin (GO:0009733);;	K14488|2.9e-46|vvi:100244862|K14488 SAUR family protein | (RefSeq) auxin-responsive protein SAUR50	Plant hormone signal transduction (ko04075)	--	--	Auxin responsive protein	Auxin-responsive protein SAUR50 OS=Helianthus annuus OX=4232 PE=3 SV=1	S	Function unknown	Auxin-responsive protein [Actinidia chinensis var. chinensis]
gene-CEY00_Acc28738	123	70	108	537	369	444	2.83432	1.6402	2.33819	11.3265	8.51101	7.77008	2.45e-23	1.77644	up	[Q]	Secondary metabolites biosynthesis, transport and catabolism	Molecular Function: oxidoreductase activity (GO:0016491);; Molecular Function: metal ion binding (GO:0046872);;	K24028|4.8e-162|jre:108992398|K24028 salicylic acid 3-hydroxylase [EC:1.14.11.-] | (RefSeq) protein DMR6-LIKE OXYGENASE 2-like	--	[QR]	Secondary metabolites biosynthesis, transport and catabolism;; General function prediction only	2OG-Fe(II) oxygenase superfamily	Protein DMR6-LIKE OXYGENASE 2 OS=Arabidopsis thaliana OX=3702 GN=DLO2 PE=2 SV=1	Q	Secondary metabolites biosynthesis, transport and catabolism	Protein DMR6-LIKE OXYGENASE 2 like [Actinidia chinensis var. chinensis]
gene-CEY00_Acc28739	59	81	59	319	219	316	1.19517	1.68386	1.11645	5.955	4.48311	4.90092	6.29e-21	1.69886	up	[Q]	Secondary metabolites biosynthesis, transport and catabolism	Molecular Function: oxidoreductase activity (GO:0016491);; Molecular Function: metal ion binding (GO:0046872);;	K24028|4.8e-162|jre:108992398|K24028 salicylic acid 3-hydroxylase [EC:1.14.11.-] | (RefSeq) protein DMR6-LIKE OXYGENASE 2-like	--	[QR]	Secondary metabolites biosynthesis, transport and catabolism;; General function prediction only	2OG-Fe(II) oxygenase superfamily	Protein DMR6-LIKE OXYGENASE 2 OS=Arabidopsis thaliana OX=3702 GN=DLO2 PE=2 SV=1	Q	Secondary metabolites biosynthesis, transport and catabolism	Protein DMR6-LIKE OXYGENASE 2 like [Actinidia chinensis var. chinensis]
gene-CEY00_Acc12040	725	871	907	361	389	445	11.9613	14.5389	13.9728	5.40976	6.39158	5.5376	1.23e-19	-1.11829	down	--	--	Molecular Function: transcription factor activity, sequence-specific DNA binding (GO:0003700);; Biological Process: positive regulation of transcription, DNA-templated (GO:0045893);;	K14432|6.5e-145|vvi:100232889|K14432 ABA responsive element binding factor | (RefSeq) GRIP55; ripening-related bZIP protein-like	Plant hormone signal transduction (ko04075)	--	--	bZIP transcription factor	ABSCISIC ACID-INSENSITIVE 5-like protein 5 OS=Arabidopsis thaliana OX=3702 GN=ABF2 PE=1 SV=1	K	Transcription	ABSCISIC ACID-INSENSITIVE 5-like protein [Actinidia chinensis var. chinensis]
gene-CEY00_Acc13221	42	39	36	5	9	17	1.51946	1.42609	1.19181	0.14984	0.32501	0.460778	3.76e-05	-1.15279	down	--	--	Cellular Component: integral component of membrane (GO:0016021);;	--	--	--	--	--	--	--	--	Location of vulva defective 1 like [Actinidia chinensis var. chinensis]
gene-CEY00_Acc29872	229	212	194	90	73	93	4.0729	3.8277	3.23198	1.45752	1.2959	1.24439	3.35e-13	-1.26456	down	--	--	Molecular Function: DNA binding (GO:0003677);; Cellular Component: nucleus (GO:0005634);; Biological Process: regulation of transcription, DNA-templated (GO:0006355);;	K16222|7.9e-59|csat:104726841|K16222 Dof zinc finger protein DOF5.5 | (RefSeq) cyclic dof factor 1-like	Circadian rhythm - plant (ko04712)	--	--	Dof domain, zinc finger	Cyclic dof factor 3 OS=Arabidopsis thaliana OX=3702 GN=CDF3 PE=1 SV=2	K	Transcription	Cyclic dof factor like [Actinidia chinensis var. chinensis]
gene-CEY00_Acc26209	41	46	25	172	205	249	0.710346	0.80522	0.410408	2.75252	3.58663	3.29507	9e-21	1.90941	up	[V]	Defense mechanisms	Molecular Function: antiporter activity (GO:0015297);; Cellular Component: integral component of membrane (GO:0016021);; Molecular Function: xenobiotic transporter activity (GO:0042910);;	K03327|2.7e-206|jre:109019248|K03327 multidrug resistance protein, MATE family | (RefSeq) protein DETOXIFICATION 41-like	--	[R]	General function prediction only	MatE	Protein DETOXIFICATION 41 OS=Arabidopsis thaliana OX=3702 GN=DTX41 PE=2 SV=1	V	Defense mechanisms	Protein DETOXIFICATION like [Actinidia chinensis var. chinensis]
gene-CEY00_Acc01860	27	18	15	220	162	160	0.522852	0.342202	0.264342	3.86623	3.10969	2.33134	8.9e-25	2.2938	up	[M]	Cell wall/membrane/envelope biogenesis	Molecular Function: protein serine/threonine kinase activity (GO:0004674);; Molecular Function: ATP binding (GO:0005524);;	K13435|1.1e-71|spen:107018783|K13435 serine/threonine-protein kinase Pto | (RefSeq) receptor-like protein kinase HERK 1 isoform X2	Plant-pathogen interaction (ko04626)	[T]	Signal transduction mechanisms	Protein tyrosine and serine/threonine kinase	Receptor-like protein kinase FERONIA OS=Arabidopsis thaliana OX=3702 GN=FER PE=1 SV=1	T	Signal transduction mechanisms	Receptor-like protein kinase [Actinidia chinensis var. chinensis]
gene-CEY00_Acc15623	20	8	12	56	47	41	0.229673	0.085221	0.131228	0.601853	0.554872	0.366848	0.000270868	1.024	up	[T]	Signal transduction mechanisms	Molecular Function: solute:proton antiporter activity (GO:0015299);; Cellular Component: integral component of membrane (GO:0016021);;	--	--	[P]	Inorganic ion transport and metabolism	Sodium/hydrogen exchanger family	Cation/H(+) antiporter 18 OS=Arabidopsis thaliana OX=3702 GN=CHX18 PE=2 SV=1	P	Inorganic ion transport and metabolism	Cation/H(+) antiporter like [Actinidia chinensis var. chinensis]
gene-CEY00_Acc06437	71	73	77	193	179	190	1.98742	2.09402	2.01066	4.97224	5.02705	4.05063	8.38e-09	1.06821	up	[J]	Translation, ribosomal structure and biogenesis	Molecular Function: structural constituent of ribosome (GO:0003735);; Cellular Component: ribosome (GO:0005840);; Biological Process: translation (GO:0006412);;	K02902|4.1e-92|jre:108988738|K02902 large subunit ribosomal protein L28 | (RefSeq) uncharacterized protein LOC108988738	Ribosome (ko03010)	[J]	Translation, ribosomal structure and biogenesis	Ribosomal L28 family	--	J	Translation, ribosomal structure and biogenesis	54S ribosomal protein [Actinidia chinensis var. chinensis]
gene-CEY00_Acc33611	7	11	18	56	68	96	0.166033	0.296541	0.444984	1.36881	1.80656	1.9574	1.15e-09	1.57582	up	--	--	Cellular Component: cellular_component (GO:0005575);; Cellular Component: extracellular region (GO:0005576);; Cellular Component: cell wall (GO:0005618);; Cellular Component: intracellular (GO:0005622);; Cellular Component: cell (GO:0005623);; Cellular Component: cytoplasm (GO:0005737);; Cellular Component: vacuole (GO:0005773);; Cellular Component: vacuolar membrane (GO:0005774);; Cellular Compo…	--	--	--	--	--	EP1-like glycoprotein 3 OS=Arabidopsis thaliana OX=3702 GN=At1g78850 PE=1 SV=1	S	Function unknown	Epidermis-specific secreted glycoprotein [Actinidia chinensis var. chinensis]
gene-CEY00_Acc24038	148	113	104	64	44	51	4.663	3.59533	3.06707	1.82743	1.3682	1.21376	2.02e-06	-1.05505	down	[P]	Inorganic ion transport and metabolism	Molecular Function: manganese ion transmembrane transporter activity (GO:0005384);; Cellular Component: integral component of membrane (GO:0016021);; Biological Process: cellular manganese ion homeostasis (GO:0030026);;	K22736|3.5e-78|zju:107406772|K22736 vacuolar iron transporter family protein | (RefSeq) vacuolar iron transporter homolog 4-like	--	[S]	Function unknown	VIT family	Vacuolar iron transporter homolog 3 OS=Arabidopsis thaliana OX=3702 GN=At3g43630 PE=2 SV=1	S	Function unknown	Vacuolar iron transporter like [Actinidia chinensis var. chinensis]
Actinidia_chinensis_newGene_1393	174	159	141	590	373	438	9.83705	9.12672	7.43999	30.6222	21.1298	18.8174	2.2e-13	1.2753	up	--	--	--	--	--	--	--	Polyketide cyclase / dehydrase and lipid transport	--	S	Function unknown	Lachrymatory-factor synthase [Actinidia chinensis var. chinensis]
gene-CEY00_Acc28514	39	48	58	163	139	158	2.51507	3.14832	3.47107	9.63191	8.98313	7.72363	3.73e-10	1.2816	up	--	--	Biological Process: regulation of systemic acquired resistance (GO:0010112);;	--	--	--	--	NPR1 interacting	--	--	--	NRR repressor like [Actinidia chinensis var. chinensis]
gene-CEY00_Acc07652	89	97	110	312	200	282	3.24074	3.58555	3.74093	10.4062	7.30059	7.819	2.09e-10	1.13726	up	--	--	Molecular Function: RNA polymerase II regulatory region sequence-specific DNA binding (GO:0000977);; Molecular Function: transcription factor activity, sequence-specific DNA binding (GO:0003700);; Cellular Component: nucleus (GO:0005634);; Biological Process: positive regulation of transcription from RNA polymerase II promoter (GO:0045944);; Molecular Function: protein dimerization activity (GO:0…	K09264|2.7e-35|aof:109822847|K09264 MADS-box transcription factor, plant | (RefSeq) MADS-box transcription factor 3-like isoform X1	--	[K]	Transcription	SRF-type transcription factor (DNA-binding and dimerisation domain)	MADS-box protein SOC1 OS=Arabidopsis thaliana OX=3702 GN=SOC1 PE=1 SV=1	K	Transcription	SOC1f [Actinidia chinensis]
gene-CEY00_Acc05674	6585	6113	7548	2148	2791	3909	195.216	183.476	208.876	57.9495	82.4235	87.4812	5.65e-22	-1.24387	down	[P]	Inorganic ion transport and metabolism	Molecular Function: carbonate dehydratase activity (GO:0004089);; Molecular Function: zinc ion binding (GO:0008270);; Biological Process: carbon utilization (GO:0015976);;	K01673|3.3e-130|hbr:110660904|K01673 carbonic anhydrase [EC:4.2.1.1] | (RefSeq) carbonic anhydrase 2-like isoform X1	Nitrogen metabolism (ko00910)	[P]	Inorganic ion transport and metabolism	Carbonic anhydrase	Carbonic anhydrase, chloroplastic OS=Nicotiana tabacum OX=4097 PE=2 SV=1	P	Inorganic ion transport and metabolism	Carbonic anhydrase [Actinidia chinensis var. chinensis]
gene-CEY00_Acc30983	324	319	311	728	697	887	7.50854	7.46778	6.72433	15.3525	16.0819	15.5126	3.7e-23	1.0978	up	--	--	Molecular Function: DNA binding (GO:0003677);; Cellular Component: nucleus (GO:0005634);;	K09422|1.7e-105|vvi:100233128|K09422 transcription factor MYB, plant | (RefSeq) SREBP; sucrose responsive element binding protein	--	[K]	Transcription	Myb-like DNA-binding domain	Transcription factor MYB44 OS=Arabidopsis thaliana OX=3702 GN=MYB44 PE=1 SV=1	K	Transcription	Transcription factor like [Actinidia chinensis var. chinensis]
gene-CEY00_Acc12691	229	156	196	1142	970	1251	6.65653	4.59206	5.31621	30.3021	28.1633	27.5312	3.74e-73	2.25638	up	[R]	General function prediction only	Molecular Function: acid phosphatase activity (GO:0003993);;	K20728|5.8e-56|thj:104814965|K20728 vegetative storage protein 2 | (RefSeq) vegetative storage protein 2-like	MAPK signaling pathway - plant (ko04016)	--	--	HAD superfamily, subfamily IIIB (Acid phosphatase)	Acid phosphatase 1 OS=Solanum lycopersicum OX=4081 GN=APS1 PE=2 SV=1	S	Function unknown	Acid phosphatase [Actinidia chinensis var. chinensis]
gene-CEY00_Acc05753	1170	1143	1149	586	475	647	23.5767	23.323	21.6017	10.7342	9.52535	9.84407	5.54e-29	-1.10416	down	--	--	Molecular Function: DNA binding (GO:0003677);; Cellular Component: nucleus (GO:0005634);;	K09422|4.9e-139|nnu:104598084|K09422 transcription factor MYB, plant | (RefSeq) transcription factor MYB34-like	--	[K]	Transcription	Myb-like DNA-binding domain	Transcription factor MYB106 OS=Arabidopsis thaliana OX=3702 GN=MYB106 PE=2 SV=1	--	--	Transcription factor like [Actinidia chinensis var. chinensis]
gene-CEY00_Acc23738	56	51	64	195	128	186	1.24192	1.14907	1.32533	3.95051	2.84389	3.13117	1.19e-09	1.21411	up	[G]	Carbohydrate transport and metabolism	Molecular Function: alpha-amylase activity (GO:0004556);; Molecular Function: calcium ion binding (GO:0005509);; Biological Process: carbohydrate metabolic process (GO:0005975);; Biological Process: response to abscisic acid (GO:0009737);; Biological Process: response to gibberellin (GO:0009739);; Cellular Component: apoplast (GO:0048046);; Molecular Function: alpha-amylase activity (releasing ma…	K01176|5.0e-214|oeu:111409082|K01176 alpha-amylase [EC:3.2.1.1] | (RefSeq) alpha-amylase	Starch and sucrose metabolism (ko00500)	[G]	Carbohydrate transport and metabolism	Alpha-amylase C-terminal beta-sheet domain	Alpha-amylase OS=Vigna mungo OX=3915 GN=AMY1.1 PE=2 SV=1	G	Carbohydrate transport and metabolism	Alpha-amylase [Actinidia chinensis var. chinensis]
gene-CEY00_Acc01513	291	244	266	95	55	73	8.06615	6.83618	6.86512	2.3812	1.50026	1.52302	2.01e-21	-1.7016	down	--	--	Cellular Component: extracellular region (GO:0005576);; Cellular Component: cell wall (GO:0005618);; Biological Process: plant-type cell wall organization (GO:0009664);; Cellular Component: membrane (GO:0016020);;	K20628|5.0e-126|gab:108450287|K20628 expansin | (RefSeq) expansin-A8-like	--	--	--	Expansin C-terminal domain	Expansin-A8 OS=Arabidopsis thaliana OX=3702 GN=EXPA8 PE=2 SV=1	S	Function unknown	Expansin-A8 like [Actinidia chinensis var. chinensis]
gene-CEY00_Acc06584	84	85	91	272	253	290	2.14001	2.20465	2.1719	6.36638	6.47271	5.62944	3.87e-17	1.3689	up	[HR]	Coenzyme transport and metabolism;; General function prediction only	Molecular Function: catalytic activity (GO:0003824);;	K08726|7.4e-122|jcu:105643456|K08726 soluble epoxide hydrolase / lipid-phosphate phosphatase [EC:3.3.2.10 3.1.3.76] | (RefSeq) uncharacterized protein LOC105643456	Arachidonic acid metabolism (ko00590);; Peroxisome (ko04146)	[I]	Lipid transport and metabolism	alpha/beta hydrolase fold	--	I	Lipid transport and metabolism	Lipid-phosphate phosphatase [Actinidia chinensis var. chinensis]
gene-CEY00_Acc27322	821	780	974	299	305	370	24.84	23.9034	27.5159	8.2208	9.18255	8.4425	1.07e-35	-1.44409	down	[E]	Amino acid transport and metabolism	--	--	--	--	--	Aluminium induced protein	Stem-specific protein TSJT1 OS=Nicotiana tabacum OX=4097 GN=TSJT1 PE=2 SV=1	S	Function unknown	Stem-specific protein [Actinidia chinensis var. chinensis]
gene-CEY00_Acc08286	82	89	73	177	178	241	4.20417	4.61038	3.50145	8.27948	9.10827	9.33563	2.52e-08	1.01155	up	--	--	Molecular Function: electron carrier activity (GO:0009055);; Molecular Function: protein disulfide oxidoreductase activity (GO:0015035);;	K03676|6.0e-54|hbr:110659868|K03676 glutaredoxin 3 | (RefSeq) putative glutaredoxin-C14	--	[O]	Posttranslational modification, protein turnover, chaperones	Glutaredoxin	Glutaredoxin-C3 OS=Oryza sativa subsp. japonica OX=39947 GN=GRXC3 PE=2 SV=1	O	Posttranslational modification, protein turnover, chaperones	Glutaredoxin-C3 like [Actinidia chinensis var. chinensis]
gene-CEY00_Acc08904	105	80	99	30	36	52	1.0005	0.766118	0.872211	0.258088	0.334458	0.373315	1.85e-06	-1.0938	down	[T]	Signal transduction mechanisms	Molecular Function: protein kinase activity (GO:0004672);; Molecular Function: ATP binding (GO:0005524);; Cellular Component: integral component of membrane (GO:0016021);;	K00924|7.8e-77|cit:102610563|K00924 kinase [EC:2.7.1.-] | (RefSeq) receptor protein kinase CLAVATA1	--	--	--	Protein kinase domain	Probable leucine-rich repeat receptor-like protein kinase At5g63930 OS=Arabidopsis thaliana OX=3702 GN=At5g63930 PE=1 SV=1	T	Signal transduction mechanisms	Leucine-rich repeat receptor-like protein kinase [Actinidia chinensis var. chinensis]
gene-CEY00_Acc25179	5396	5533	5718	18136	14324	18699	141.805	147.193	140.256	433.717	375.099	370.975	2.01e-68	1.45547	up	[IR]	Lipid transport and metabolism;; General function prediction only	Molecular Function: hydrolase activity, acting on ester bonds (GO:0016788);;	K00679|2.6e-46|cic:CICLE_v10027727mg|K00679 phospholipid:diacylglycerol acyltransferase [EC:2.3.1.158] | (RefSeq) hypothetical protein	Glycerolipid metabolism (ko00561)	--	--	GDSL-like Lipase/Acylhydrolase	GDSL esterase/lipase At1g29670 OS=Arabidopsis thaliana OX=3702 GN=At1g29670 PE=2 SV=1	S	Function unknown	GDSL esterase/lipase [Actinidia chinensis var. chinensis]

## Sheet: Table S3
Table S3 The top 20 significantly enriched pathways in differentially expressed genes.
KEGG_A_class	KEGG_B_class	ID	Pathway	GeneRatio	BgRatio	enrich_factor	pvalue	qvalue	geneID	gene_number	Contained
Metabolism	Biosynthesis of other secondary metabolites	ko00940	Phenylpropanoid biosynthesis	0.0694	0.0258	2.69	0.000207788	0.00946112	gene-CEY00_Acc03651;gene-CEY00_Acc06449;gene-CEY00_Acc06537;gene-CEY00_Acc06935;gene-CEY00_Acc09332;gene-CEY00_Acc09334;gene-CEY00_Acc10081;gene-CEY00_Acc10282;gene-CEY00_Acc11474;gene-CEY00_Acc12443;gene-CEY00_Acc14115;gene-CEY00_Acc14798;gene-CEY00_Acc20424;gene-CEY00_Acc24937;gene-CEY00_Acc27278;gene-CEY00_Acc30960;gene-CEY00_Acc31596	17	up&down
Metabolism	Biosynthesis of other secondary metabolites	ko00943	Isoflavonoid biosynthesis	0.0204	0.0025	8.17	0.000321106	0.00946112	gene-CEY00_Acc05800;gene-CEY00_Acc05801;gene-CEY00_Acc10635;gene-CEY00_Acc12073;gene-CEY00_Acc33364	5	up&down
Metabolism	Energy metabolism	ko00196	Photosynthesis - antenna proteins	0.0204	0.0026	7.92	0.000374503	0.00946112	gene-CEY00_Acc06597;gene-CEY00_Acc20748;gene-CEY00_Acc21328;gene-CEY00_Acc25199;gene-CEY00_Acc26692	5	down
Metabolism	Lipid metabolism	ko00073	Cutin, suberine and wax biosynthesis	0.0286	0.006	4.73	0.000678739	0.0128603	gene-CEY00_Acc07934;gene-CEY00_Acc16500;gene-CEY00_Acc17995;gene-CEY00_Acc28299;gene-CEY00_Acc29641;gene-CEY00_Acc30065;gene-CEY00_Acc31796	7	up&down
Metabolism	Biosynthesis of other secondary metabolites	ko00944	Flavone and flavonol biosynthesis	0.0163	0.0024	6.76	0.00271052	0.0410858	gene-CEY00_Acc01293;gene-CEY00_Acc05800;gene-CEY00_Acc05801;gene-CEY00_Acc32390	4	up&down
Environmental Information Processing	Signal transduction	ko04075	Plant hormone signal transduction	0.1306	0.0827	1.58	0.00652943	0.082477	gene-CEY00_Acc00453;gene-CEY00_Acc00550;gene-CEY00_Acc01592;gene-CEY00_Acc04212;gene-CEY00_Acc04712;gene-CEY00_Acc06864;gene-CEY00_Acc06866;gene-CEY00_Acc08023;gene-CEY00_Acc08702;gene-CEY00_Acc09801;gene-CEY00_Acc09945;gene-CEY00_Acc10239;gene-CEY00_Acc10407;gene-CEY00_Acc11285;gene-CEY00_Acc11415;gene-CEY00_Acc11788;gene-CEY00_Acc12040;gene-CEY00_Acc12686;gene-CEY00_Acc13210;gene-CEY00_Acc13467…	32	up&down
Organismal Systems	Environmental adaptation	ko04626	Plant-pathogen interaction	0.1265	0.0843	1.5	0.0147327	0.154574	Actinidia_chinensis_newGene_1336;gene-CEY00_Acc01838;gene-CEY00_Acc01860;gene-CEY00_Acc01897;gene-CEY00_Acc02337;gene-CEY00_Acc02780;gene-CEY00_Acc02911;gene-CEY00_Acc02912;gene-CEY00_Acc06864;gene-CEY00_Acc06866;gene-CEY00_Acc07326;gene-CEY00_Acc09988;gene-CEY00_Acc12224;gene-CEY00_Acc12414;gene-CEY00_Acc14394;gene-CEY00_Acc14979;gene-CEY00_Acc15612;gene-CEY00_Acc17293;gene-CEY00_Acc18281;gene-C…	31	up&down
Metabolism	Amino acid metabolism	ko00380	Tryptophan metabolism	0.0286	0.0107	2.67	0.0163185	0.154574	gene-CEY00_Acc09158;gene-CEY00_Acc10053;gene-CEY00_Acc13622;gene-CEY00_Acc13728;gene-CEY00_Acc16343;gene-CEY00_Acc19207;gene-CEY00_Acc32453	7	up&down
Metabolism	Lipid metabolism	ko00561	Glycerolipid metabolism	0.0367	0.0162	2.27	0.0183557	0.154574	gene-CEY00_Acc06063;gene-CEY00_Acc06512;gene-CEY00_Acc07928;gene-CEY00_Acc25179;gene-CEY00_Acc27061;gene-CEY00_Acc27732;gene-CEY00_Acc30095;gene-CEY00_Acc30867;gene-CEY00_Acc32453	9	up&down
--	--	ko04016	MAPK signaling pathway - plant	0.0816	0.0499	1.64	0.020826	0.157839	gene-CEY00_Acc01838;gene-CEY00_Acc02337;gene-CEY00_Acc05263;gene-CEY00_Acc06864;gene-CEY00_Acc06866;gene-CEY00_Acc08702;gene-CEY00_Acc09945;gene-CEY00_Acc09988;gene-CEY00_Acc10239;gene-CEY00_Acc12691;gene-CEY00_Acc14979;gene-CEY00_Acc17732;gene-CEY00_Acc18281;gene-CEY00_Acc21162;gene-CEY00_Acc21375;gene-CEY00_Acc22438;gene-CEY00_Acc22439;gene-CEY00_Acc24397;gene-CEY00_Acc29873;gene-CEY00_Acc31852	20	up&down
Metabolism	Carbohydrate metabolism	ko00500	Starch and sucrose metabolism	0.0612	0.0358	1.71	0.0302491	0.208415	gene-CEY00_Acc03929;gene-CEY00_Acc03953;gene-CEY00_Acc09332;gene-CEY00_Acc09334;gene-CEY00_Acc14850;gene-CEY00_Acc14955;gene-CEY00_Acc15786;gene-CEY00_Acc19908;gene-CEY00_Acc23128;gene-CEY00_Acc23738;gene-CEY00_Acc24937;gene-CEY00_Acc27132;gene-CEY00_Acc27134;gene-CEY00_Acc31596;gene-CEY00_Acc32106	15	up&down
Organismal Systems	Environmental adaptation	ko04712	Circadian rhythm - plant	0.0327	0.0156	2.09	0.0386946	0.226277	gene-CEY00_Acc06345;gene-CEY00_Acc08970;gene-CEY00_Acc18278;gene-CEY00_Acc21847;gene-CEY00_Acc22180;gene-CEY00_Acc22501;gene-CEY00_Acc26605;gene-CEY00_Acc29872	8	up&down
Metabolism	Biosynthesis of other secondary metabolites	ko00402	Benzoxazinoid biosynthesis	0.0082	0.0013	6.33	0.0388128	0.226277	gene-CEY00_Acc16462;gene-CEY00_Acc31751	2	up
Metabolism	Metabolism of other amino acids	ko00460	Cyanoamino acid metabolism	0.0204	0.008	2.56	0.0461484	0.249826	gene-CEY00_Acc09332;gene-CEY00_Acc09334;gene-CEY00_Acc24009;gene-CEY00_Acc24937;gene-CEY00_Acc31596	5	up&down
Metabolism	Lipid metabolism	ko00062	Fatty acid elongation	0.0163	0.0057	2.85	0.0515603	0.260515	gene-CEY00_Acc02911;gene-CEY00_Acc02912;gene-CEY00_Acc07326;gene-CEY00_Acc12224	4	up&down
Metabolism	Amino acid metabolism	ko00280	Valine, leucine and isoleucine degradation	0.0204	0.0095	2.15	0.0842262	0.398966	gene-CEY00_Acc04900;gene-CEY00_Acc04901;gene-CEY00_Acc18145;gene-CEY00_Acc23932;gene-CEY00_Acc32453	5	up&down
Metabolism	Lipid metabolism	ko00071	Fatty acid degradation	0.0163	0.007	2.33	0.0931322	0.415203	gene-CEY00_Acc16500;gene-CEY00_Acc23373;gene-CEY00_Acc31796;gene-CEY00_Acc32453	4	up&down
Metabolism	Metabolism of terpenoids and polyketides	ko00908	Zeatin biosynthesis	0.0163	0.0073	2.25	0.102287	0.430682	gene-CEY00_Acc04606;gene-CEY00_Acc08453;gene-CEY00_Acc08456;gene-CEY00_Acc20480	4	up&down
Metabolism	Biosynthesis of other secondary metabolites	ko00945	Stilbenoid, diarylheptanoid and gingerol biosynthesis	0.0122	0.0049	2.49	0.119197	0.448792	gene-CEY00_Acc10081;gene-CEY00_Acc12443;gene-CEY00_Acc15046	3	up
Metabolism	Metabolism of terpenoids and polyketides	ko00909	Sesquiterpenoid and triterpenoid biosynthesis	0.0082	0.0025	3.27	0.124344	0.448792	gene-CEY00_Acc05591;gene-CEY00_Acc09772	2	up&down

## Sheet: Table S4
Table S4 The 71 differentially expressed transcription factors of the transcriptome
Transcription factor family	Gene_id	HR3_Count	HR2_Count	HR1_Count	HS3_Count	HS2_Count	HS1_Count	HR3_FPKM	HR2_FPKM	HR1_FPKM	HS3_FPKM	HS2_FPKM	HS1_FPKM	FDR	log2FC	regulated	COG_class	COG_class_annotation	GO_annotation	KEGG_annotation	KEGG_pathway_annotation	KOG_class	KOG_class_annotation		Pfam_annotation	Swiss-Prot_annotation	eggNOG_class	eggNOG_class_annotation	NR_annotation
AP2	gene-CEY00_Acc12235	14	6	6	35	42	46	0.290953	0.128589	0.120715	0.698959	0.909024	0.754111	4.58e-05	1.14562	up	--	--	Molecular Function: DNA binding (GO:0003677);; Molecular Function: transcription factor activity, sequence-specific DNA binding (GO:0003700);; Cellular Component: nucleus (GO:0005634);;	K12900|1.3e-29|lang:109341833|K12900 FUS-interacting serine-arginine-rich protein 1 | (RefSeq) serine/arginine-rich SC35-like splicing factor SCL30A	Spliceosome (ko03040)	--	--	AP2	AP2 domain	Ethylene-responsive transcription factor ERF110 OS=Arabidopsis thaliana OX=3702 GN=ERF110 PE=2 SV=2	K	Transcription	Ethylene-responsive transcription factor [Actinidia chinensis var. chinensis]
AP2	gene-CEY00_Acc03601	35	54	52	120	138	117	0.921895	1.4366	1.2704	2.85888	3.60917	2.32858	6.92e-06	1.02875	up	--	--	Molecular Function: DNA binding (GO:0003677);; Molecular Function: transcription factor activity, sequence-specific DNA binding (GO:0003700);; Cellular Component: nucleus (GO:0005634);;	K09286|2.0e-67|sind:105160656|K09286 EREBP-like factor | (RefSeq) ethylene-responsive transcription factor 5-like	--	--	--	AP2	AP2 domain	Ethylene-responsive transcription factor 5 OS=Nicotiana tabacum OX=4097 GN=ERF5 PE=2 SV=1	K	Transcription	Ethylene-responsive transcription factor 5 like [Actinidia chinensis var. chinensis]
AP2	gene-CEY00_Acc17293	14	5	14	83	102	107	0.630013	0.236704	0.578114	3.52824	4.74345	3.7809	3.48e-16	2.01093	up	--	--	Molecular Function: DNA binding (GO:0003677);; Molecular Function: transcription factor activity, sequence-specific DNA binding (GO:0003700);; Cellular Component: nucleus (GO:0005634);;	K13433|4.1e-43|qsu:112020158|K13433 pathogenesis-related genes transcriptional activator PTI5 | (RefSeq) pathogenesis-related genes transcriptional activator PTI5-like	Plant-pathogen interaction (ko04626)	--	--	AP2	AP2 domain	Pathogenesis-related genes transcriptional activator PTI5 OS=Solanum lycopersicum OX=4081 GN=PTI5 PE=2 SV=1	K	Transcription	Pathogenesis-related transcriptional activator like [Actinidia chinensis var. chinensis]
AP2	gene-CEY00_Acc11606	0	2	4	37	35	57	0	0.036106	0.08741	0.780867	0.798916	0.991467	1.03e-10	1.75287	up	--	--	Molecular Function: DNA binding (GO:0003677);; Molecular Function: transcription factor activity, sequence-specific DNA binding (GO:0003700);; Cellular Component: nucleus (GO:0005634);;	K12900|8.8e-31|lang:109341833|K12900 FUS-interacting serine-arginine-rich protein 1 | (RefSeq) serine/arginine-rich SC35-like splicing factor SCL30A	Spliceosome (ko03040)	--	--	AP2	AP2 domain	Ethylene-responsive transcription factor ERF110 OS=Arabidopsis thaliana OX=3702 GN=ERF110 PE=2 SV=2	K	Transcription	Ethylene-responsive transcription factor [Actinidia chinensis var. chinensis]
AP2	gene-CEY00_Acc26999	120	105	110	353	296	401	2.0431	1.8076	1.73985	5.483	5.02826	5.16337	6.45e-21	1.38934	up	--	--	Molecular Function: DNA binding (GO:0003677);; Molecular Function: transcription factor activity, sequence-specific DNA binding (GO:0003700);; Cellular Component: nucleus (GO:0005634);;	K09285|5.0e-155|tcc:18596215|K09285 AP2-like factor, ANT lineage | (RefSeq) AP2-like ethylene-responsive transcription factor AIL1	--	--	--	AP2	AP2 domain	AP2-like ethylene-responsive transcription factor AIL1 OS=Arabidopsis thaliana OX=3702 GN=AIL1 PE=2 SV=1	K	Transcription	AP2-like ethylene-responsive transcription factor [Actinidia chinensis var. chinensis]
AP2	gene-CEY00_Acc15612	279	324	305	687	680	1015	6.09352	7.16597	6.22452	13.695	14.8406	16.7806	4.85e-21	1.17882	up	--	--	Molecular Function: DNA binding (GO:0003677);; Molecular Function: transcription factor activity, sequence-specific DNA binding (GO:0003700);; Cellular Component: nucleus (GO:0005634);;	K13434|4.3e-35|mdm:103447258|K13434 pathogenesis-related genes transcriptional activator PTI6 | (RefSeq) pathogenesis-related genes transcriptional activator PTI6-like	Plant-pathogen interaction (ko04626)	--	--	AP2	AP2 domain	Ethylene-responsive transcription factor CRF2 OS=Arabidopsis thaliana OX=3702 GN=CRF2 PE=1 SV=1	K	Transcription	Ethylene-responsive transcription factor [Actinidia chinensis var. chinensis]
AP2	gene-CEY00_Acc08308	68	60	49	216	125	189	1.3417	1.20497	0.897282	3.91504	2.47289	2.84029	1.53e-08	1.18979	up	--	--	Molecular Function: DNA binding (GO:0003677);; Molecular Function: transcription factor activity, sequence-specific DNA binding (GO:0003700);; Cellular Component: nucleus (GO:0005634);;	K12900|2.0e-28|lang:109341833|K12900 FUS-interacting serine-arginine-rich protein 1 | (RefSeq) serine/arginine-rich SC35-like splicing factor SCL30A	Spliceosome (ko03040)	--	--	AP2	AP2 domain	Ethylene-responsive transcription factor ERF113 OS=Arabidopsis thaliana OX=3702 GN=ERF113 PE=2 SV=1	K	Transcription	Ethylene-responsive transcription factor [Actinidia chinensis var. chinensis]
ARR	gene-CEY00_Acc24383	72	76	101	236	177	200	2.01769	2.15398	2.65906	6.0834	4.98102	4.27047	1.62e-07	1.01543	up	[TK]	Signal transduction mechanisms;; Transcription	Biological Process: phosphorelay signal transduction system (GO:0000160);;	K14492|2.9e-64|zju:107406325|K14492 two-component response regulator ARR-A family | (RefSeq) two-component response regulator ORR9-like	Plant hormone signal transduction (ko04075)	[K]	Transcription	ARR	Response regulator receiver domain	Two-component response regulator ORR4 OS=Oryza sativa subsp. indica OX=39946 GN=RR4 PE=2 SV=1	K	Transcription	Two-component response regulator like [Actinidia chinensis var. chinensis]
ARR	gene-CEY00_Acc13210	173	156	148	464	331	383	5.90696	5.36624	4.71107	14.4065	11.2417	9.87016	7.09e-11	1.0672	up	[T]	Signal transduction mechanisms	Biological Process: phosphorelay signal transduction system (GO:0000160);;	K14492|1.2e-75|tcc:18598779|K14492 two-component response regulator ARR-A family | (RefSeq) two-component response regulator ARR9	Plant hormone signal transduction (ko04075)	[K]	Transcription	ARR	Response regulator receiver domain	Two-component response regulator ARR9 OS=Arabidopsis thaliana OX=3702 GN=ARR9 PE=1 SV=1	K	Transcription	Two-component response regulator like [Actinidia chinensis var. chinensis]
B3	gene-CEY00_Acc28540	19	12	13	110	69	101	0.390232	0.258306	0.245632	2.12997	1.46964	1.62026	7.7e-13	1.75447	up	--	--	Molecular Function: DNA binding (GO:0003677);; Molecular Function: transcription factor activity, sequence-specific DNA binding (GO:0003700);; Cellular Component: nucleus (GO:0005634);;	K09287|2.8e-141|vvi:100262843|K09287 RAV-like factor | (RefSeq) AP2/ERF and B3 domain-containing transcription factor RAV1	--	--	--	B3	B3 DNA binding domain	AP2/ERF and B3 domain-containing transcription repressor TEM1 OS=Arabidopsis thaliana OX=3702 GN=TEM1 PE=1 SV=1	K	Transcription	AP2/ERF and B3 domain-containing transcription repressor like [Actinidia chinensis var. chinensis]
bHLH	gene-CEY00_Acc18978	21	36	32	104	96	113	0.728078	1.30001	1.04701	3.35525	3.40072	3.05029	1.91e-08	1.2963	up	--	--	Molecular Function: DNA binding (GO:0003677);; Biological Process: regulation of transcription from RNA polymerase II promoter (GO:0006357);; Molecular Function: protein dimerization activity (GO:0046983);;	--	--	--	--	bHLH	Helix-loop-helix DNA-binding domain	Transcription factor bHLH162 OS=Arabidopsis thaliana OX=3702 GN=BHLH162 PE=1 SV=1	K	Transcription	Transcription factor bHLH36 like [Actinidia chinensis var. chinensis]
bHLH	gene-CEY00_Acc29257	103	117	118	61	42	49	3.09038	3.55817	3.29555	1.66184	1.2324	1.10461	2.07e-06	-1.03177	down	--	--	Biological Process: regulation of transcription, DNA-templated (GO:0006355);; Molecular Function: protein dimerization activity (GO:0046983);;	K18878|1.9e-28|cann:107866053|K18878 BHLH transcription factor Upa20 | (RefSeq) Upa20; transcription factor bHLH137-like	Plant-pathogen interaction (ko04626)	--	--	bHLH	Helix-loop-helix DNA-binding domain	Transcription factor BEE 3 OS=Arabidopsis thaliana OX=3702 GN=BEE3 PE=2 SV=1	K	Transcription	Transcription factor BEE like [Actinidia chinensis var. chinensis]
bHLH	gene-CEY00_Acc10239	23	17	11	65	63	60	0.511425	0.385098	0.214965	1.33319	1.41948	1.01201	1.2e-05	1.16102	up	--	--	Molecular Function: protein dimerization activity (GO:0046983);;	K13422|4.5e-14|ats:109750771|K13422 transcription factor MYC2 | (RefSeq) LOC109750771; transcription factor MYC2-like	MAPK signaling pathway - plant (ko04016);; Plant hormone signal transduction (ko04075)	--	--	bHLH	Helix-loop-helix DNA-binding domain	Transcription factor bHLH25 OS=Arabidopsis thaliana OX=3702 GN=BHLH25 PE=2 SV=2	K	Transcription	Transcription factor bHLH25 like [Actinidia chinensis var. chinensis]
bHLH	gene-CEY00_Acc29921	73	69	61	28	15	36	1.19672	1.14777	0.928697	0.405749	0.236475	0.441046	2.2e-05	-1.07676	down	--	--	Molecular Function: protein dimerization activity (GO:0046983);;	K16189|6.1e-57|psom:113281592|K16189 phytochrome-interacting factor 4 | (RefSeq) transcription factor PIF4-like isoform X1	Plant hormone signal transduction (ko04075)	--	--	bHLH	Helix-loop-helix DNA-binding domain	Transcription factor PIF1 OS=Arabidopsis thaliana OX=3702 GN=PIF1 PE=1 SV=1	K	Transcription	Transcription factor like [Actinidia chinensis var. chinensis]
bZIP	gene-CEY00_Acc11788	578	499	643	307	190	345	10.4625	9.14092	10.8595	5.05879	3.41793	4.71316	3.56e-13	-1.07177	down	--	--	Molecular Function: transcription factor activity, sequence-specific DNA binding (GO:0003700);; Biological Process: positive regulation of transcription, DNA-templated (GO:0045893);;	K14432|6.8e-155|vvi:100232889|K14432 ABA responsive element binding factor | (RefSeq) GRIP55; ripening-related bZIP protein-like	Plant hormone signal transduction (ko04075)	--	--	bZIP	bZIP transcription factor	ABSCISIC ACID-INSENSITIVE 5-like protein 5 OS=Arabidopsis thaliana OX=3702 GN=ABF2 PE=1 SV=1	K	Transcription	ABSCISIC ACID-INSENSITIVE 5-like protein [Actinidia chinensis var. chinensis]
bZIP	gene-CEY00_Acc12040	725	871	907	361	389	445	11.9613	14.5389	13.9728	5.40976	6.39158	5.5376	1.23e-19	-1.11829	down	--	--	Molecular Function: transcription factor activity, sequence-specific DNA binding (GO:0003700);; Biological Process: positive regulation of transcription, DNA-templated (GO:0045893);;	K14432|6.5e-145|vvi:100232889|K14432 ABA responsive element binding factor | (RefSeq) GRIP55; ripening-related bZIP protein-like	Plant hormone signal transduction (ko04075)	--	--	bZIP	bZIP transcription factor	ABSCISIC ACID-INSENSITIVE 5-like protein 5 OS=Arabidopsis thaliana OX=3702 GN=ABF2 PE=1 SV=1	K	Transcription	ABSCISIC ACID-INSENSITIVE 5-like protein [Actinidia chinensis var. chinensis]
C2H2	gene-CEY00_Acc12085	27	35	34	116	117	115	0.844107	1.11494	1.00626	3.34312	3.684	2.74537	9.33e-10	1.3657	up	--	--	--	--	--	[R]	General function prediction only	C2H2	C2H2-type zinc finger	Zinc finger protein ZAT10 OS=Arabidopsis thaliana OX=3702 GN=ZAT10 PE=2 SV=1	S	Function unknown	Zinc finger protein [Actinidia chinensis var. chinensis]
C2H2	gene-CEY00_Acc04777	52	45	48	150	127	134	1.57476	1.36253	1.33777	4.14247	3.83167	3.05149	4.98e-08	1.14244	up	--	--	--	--	--	[R]	General function prediction only	C2H2	C2H2-type zinc finger	Zinc finger protein ZAT6 OS=Arabidopsis thaliana OX=3702 GN=ZAT6 PE=2 SV=1	S	Function unknown	Zinc finger protein [Actinidia chinensis var. chinensis]
C2H2	gene-CEY00_Acc23803	9	10	11	64	55	107	0.25076	0.273413	0.297095	1.7002	1.5946	2.35701	7.67e-12	1.75085	up	--	--	--	--	--	[R]	General function prediction only	C2H2	C2H2-type zinc finger	Zinc finger protein ZAT6 OS=Arabidopsis thaliana OX=3702 GN=ZAT6 PE=2 SV=1	S	Function unknown	Zinc finger protein [Actinidia chinensis var. chinensis]
GRF	gene-CEY00_Acc12098	2519	2487	2510	7056	4606	6163	38.582	38.5557	35.8793	98.345	70.2929	71.2651	3.93e-19	1.06364	up	--	--	Molecular Function: ATP binding (GO:0005524);; Cellular Component: nucleus (GO:0005634);; Biological Process: transcription, DNA-templated (GO:0006351);; Biological Process: regulation of transcription, DNA-templated (GO:0006355);; Biological Process: developmental process (GO:0032502);;	K22382|4.0e-11|oeu:111408549|K22382 WD repeat-containing protein 26 | (RefSeq) WD repeat-containing protein 26 homolog	--	--	--	GRF	WRC	Growth-regulating factor 6 OS=Oryza sativa subsp. japonica OX=39947 GN=GRF6 PE=2 SV=2	K	Transcription	Growth-regulating factor like [Actinidia chinensis var. chinensis]
GRF	gene-CEY00_Acc20346	110	102	88	252	201	273	2.81419	2.62942	2.0997	5.8525	5.12598	5.27113	2.28e-09	1.02028	up	--	--	Molecular Function: ATP binding (GO:0005524);; Cellular Component: nucleus (GO:0005634);; Biological Process: transcription, DNA-templated (GO:0006351);; Biological Process: regulation of transcription, DNA-templated (GO:0006355);; Biological Process: developmental process (GO:0032502);;	K22382|3.2e-11|oeu:111408549|K22382 WD repeat-containing protein 26 | (RefSeq) WD repeat-containing protein 26 homolog	--	--	--	GRF	WRC	Growth-regulating factor 4 OS=Oryza sativa subsp. japonica OX=39947 GN=GRF4 PE=1 SV=1	K	Transcription	Growth-regulating factor like [Actinidia chinensis var. chinensis]
GRF	gene-CEY00_Acc23374	831	930	948	2532	1822	2288	16.1293	18.28	17.1847	44.7443	35.2541	33.5494	2.49e-21	1.11294	up	--	--	Molecular Function: ATP binding (GO:0005524);; Cellular Component: nucleus (GO:0005634);; Biological Process: transcription, DNA-templated (GO:0006351);; Biological Process: regulation of transcription, DNA-templated (GO:0006355);; Biological Process: developmental process (GO:0032502);;	K22382|4.2e-11|oeu:111408549|K22382 WD repeat-containing protein 26 | (RefSeq) WD repeat-containing protein 26 homolog	--	--	--	GRF	WRC	Growth-regulating factor 3 OS=Oryza sativa subsp. japonica OX=39947 GN=GRF3 PE=3 SV=2	K	Transcription	Growth-regulating factor like [Actinidia chinensis var. chinensis]
GRF	gene-CEY00_Acc04802	605	589	577	1574	1080	1593	9.25733	9.11863	8.22839	21.9186	16.4563	18.395	6.3e-20	1.07287	up	--	--	Molecular Function: ATP binding (GO:0005524);; Cellular Component: nucleus (GO:0005634);; Biological Process: transcription, DNA-templated (GO:0006351);; Biological Process: regulation of transcription, DNA-templated (GO:0006355);; Biological Process: developmental process (GO:0032502);;	K22382|1.6e-12|oeu:111408549|K22382 WD repeat-containing protein 26 | (RefSeq) WD repeat-containing protein 26 homolog	--	--	--	GRF	WRC	Growth-regulating factor 6 OS=Oryza sativa subsp. japonica OX=39947 GN=GRF6 PE=2 SV=2	K	Transcription	Growth-regulating factor like [Actinidia chinensis var. chinensis]
GRF	gene-CEY00_Acc23835	494	463	424	1373	1036	1397	9.23302	8.75435	7.40145	23.3508	19.2949	19.7189	4.78e-28	1.2674	up	--	--	Molecular Function: ATP binding (GO:0005524);; Cellular Component: nucleus (GO:0005634);; Biological Process: transcription, DNA-templated (GO:0006351);; Biological Process: regulation of transcription, DNA-templated (GO:0006355);; Biological Process: developmental process (GO:0032502);;	K22382|9.5e-13|oeu:111408549|K22382 WD repeat-containing protein 26 | (RefSeq) WD repeat-containing protein 26 homolog	--	--	--	GRF	WRC	Growth-regulating factor 6 OS=Oryza sativa subsp. japonica OX=39947 GN=GRF6 PE=2 SV=2	K	Transcription	Growth-regulating factor like [Actinidia chinensis var. chinensis]
HD-ZIP	gene-CEY00_Acc00969	68	97	70	27	32	22	2.52541	3.61906	2.40002	0.89966	1.15502	0.605429	3.71e-06	-1.16611	down	--	--	Cellular Component: nucleus (GO:0005634);; Biological Process: regulation of transcription, DNA-templated (GO:0006355);; Molecular Function: sequence-specific DNA binding (GO:0043565);;	K09338|9.4e-73|ccav:112513454|K09338 homeobox-leucine zipper protein | (RefSeq) homeobox-leucine zipper protein ATHB-40	--	[K]	Transcription	HD-ZIP	Homeodomain	Homeobox-leucine zipper protein ATHB-40 OS=Arabidopsis thaliana OX=3702 GN=ATHB-40 PE=2 SV=3	K	Transcription	Homeobox-leucine zipper protein like [Actinidia chinensis var. chinensis]
HD-ZIP	gene-CEY00_Acc31410	31	47	48	12	12	14	0.751911	1.1693	1.08793	0.249923	0.28612	0.258897	5.87e-05	-1.11055	down	--	--	Cellular Component: nucleus (GO:0005634);; Biological Process: regulation of transcription, DNA-templated (GO:0006355);; Molecular Function: sequence-specific DNA binding (GO:0043565);;	K09338|2.1e-65|ccaj:109808273|K09338 homeobox-leucine zipper protein | (RefSeq) homeobox-leucine zipper protein HAT5-like	--	[K]	Transcription	HD-ZIP	Homeodomain	Homeobox-leucine zipper protein HAT5 OS=Arabidopsis thaliana OX=3702 GN=HAT5 PE=1 SV=1	K	Transcription	Homeobox-leucine zipper protein [Actinidia chinensis var. chinensis]
HD-ZIP	gene-CEY00_Acc09622	713	681	710	1685	1614	2221	6.68095	6.46404	6.21128	14.3777	15.0761	15.7214	3.54e-41	1.22103	up	--	--	Molecular Function: DNA binding (GO:0003677);; Cellular Component: nucleus (GO:0005634);; Molecular Function: lipid binding (GO:0008289);;	K09338|0.0e+00|sind:105175372|K09338 homeobox-leucine zipper protein | (RefSeq) homeobox-leucine zipper protein MERISTEM L1	--	--	--	HD-ZIP	START domain	Homeobox-leucine zipper protein PROTODERMAL FACTOR 2 OS=Arabidopsis thaliana OX=3702 GN=PDF2 PE=1 SV=1	K	Transcription	Homeobox-leucine zipper protein like [Actinidia chinensis var. chinensis]
HD-ZIP	gene-CEY00_Acc10164	57	69	58	237	180	188	1.65054	2.01668	1.54439	6.25228	5.20165	4.11675	9.78e-12	1.34621	up	--	--	Cellular Component: nucleus (GO:0005634);; Biological Process: regulation of transcription, DNA-templated (GO:0006355);; Molecular Function: sequence-specific DNA binding (GO:0043565);;	K09338|2.3e-86|vvi:100265773|K09338 homeobox-leucine zipper protein | (RefSeq) homeobox-leucine zipper protein HOX11	--	[K]	Transcription	HD-ZIP	Homeodomain	Homeobox-leucine zipper protein HAT14 OS=Arabidopsis thaliana OX=3702 GN=HAT14 PE=2 SV=3	K	Transcription	Homeobox-leucine zipper protein [Actinidia chinensis var. chinensis]
HSF	gene-CEY00_Acc23145	50	42	47	197	206	215	1.42421	1.21268	1.23554	5.13796	5.86654	4.63982	4.97e-20	1.72757	up	--	--	Molecular Function: transcription factor activity, sequence-specific DNA binding (GO:0003700);; Cellular Component: nucleus (GO:0005634);; Cellular Component: host cell nucleus (GO:0042025);; Molecular Function: sequence-specific DNA binding (GO:0043565);;	K09419|8.3e-94|qsu:112013936|K09419 heat shock transcription factor, other eukaryote | (RefSeq) heat stress transcription factor B-3-like isoform X1	--	[K]	Transcription	HSF	HSF-type DNA-binding	Heat stress transcription factor B-3 OS=Arabidopsis thaliana OX=3702 GN=HSFB3 PE=1 SV=1	K	Transcription	Heat stress transcription factor B-3 like [Actinidia chinensis var. chinensis]
KNOX	gene-CEY00_Acc31137	29	33	18	105	107	148	1.38135	1.56813	0.765725	4.55573	5.11224	5.33873	8.63e-12	1.55197	up	--	--	Molecular Function: DNA binding (GO:0003677);; Cellular Component: nucleus (GO:0005634);; Cellular Component: cytoplasm (GO:0005737);; Biological Process: leaf proximal/distal pattern formation (GO:0010589);; Biological Process: positive regulation of transcription, DNA-templated (GO:0045893);;	--	--	--	--	KNOX	KNOX2 domain	Protein KNATM OS=Arabidopsis thaliana OX=3702 GN=KNATM PE=1 SV=1	K	Transcription	Homeobox protein knotted-1-like [Actinidia chinensis var. chinensis]
MYB	gene-CEY00_Acc14121	29	37	36	228	131	179	0.658764	0.868929	0.772062	4.85753	3.06443	3.17546	7.01e-17	1.79497	up	--	--	Molecular Function: DNA binding (GO:0003677);; Cellular Component: nucleus (GO:0005634);;	K09422|7.5e-93|tcc:18610359|K09422 transcription factor MYB, plant | (RefSeq) protein ODORANT1	--	[K]	Transcription	MYB	Myb-like DNA-binding domain	Transcription factor MYB106 OS=Arabidopsis thaliana OX=3702 GN=MYB106 PE=2 SV=1	--	--	Transcription factor like [Actinidia chinensis var. chinensis]
MYB	gene-CEY00_Acc23700	25	32	33	93	78	79	0.444019	0.580714	0.553575	1.54237	1.40876	1.08789	3.23e-05	1.01709	up	--	--	Molecular Function: DNA binding (GO:0003677);; Cellular Component: nucleus (GO:0005634);;	K14491|7.6e-07|hbr:110641592|K14491 two-component response regulator ARR-B family | (RefSeq) uncharacterized protein LOC110641592	Plant hormone signal transduction (ko04075)	--	--	MYB	Myb-like DNA-binding domain	Probable transcription factor KAN4 OS=Arabidopsis thaliana OX=3702 GN=KAN4 PE=1 SV=1	K	Transcription	Transcription factor KAN4 [Actinidia chinensis var. chinensis]
MYB	gene-CEY00_Acc07326	4589	4029	4330	932	1290	1389	240.8	213.994	212.063	44.4868	67.4291	55.0244	1.89e-51	-1.8425	down	--	--	Molecular Function: DNA binding (GO:0003677);; Cellular Component: nucleus (GO:0005634);;	K15397|1.1e-24|cpep:111776416|K15397 3-ketoacyl-CoA synthase [EC:2.3.1.199] | (RefSeq) 3-ketoacyl-CoA synthase 17-like	Fatty acid elongation (ko00062);; Plant-pathogen interaction (ko04626)	[O]	Posttranslational modification, protein turnover, chaperones	MYB	Myb-like DNA-binding domain	Protein RADIALIS-like 1 OS=Arabidopsis thaliana OX=3702 GN=RL1 PE=2 SV=1	K	Transcription	Protein RADIALIS-like [Actinidia chinensis var. chinensis]
MYB	gene-CEY00_Acc28493	25	26	26	88	55	87	0.540119	0.580978	0.537218	1.78052	1.21497	1.4564	2.29e-05	1.05551	up	--	--	Molecular Function: DNA binding (GO:0003677);;	K09422|7.8e-86|qsu:112040952|K09422 transcription factor MYB, plant | (RefSeq) transcription factor MYB62-like	--	[K]	Transcription	MYB	Myb-like DNA-binding domain	Transcription factor MYB62 OS=Arabidopsis thaliana OX=3702 GN=MYB62 PE=2 SV=1	--	--	Transcription factor like [Actinidia chinensis var. chinensis]
MYB	gene-CEY00_Acc31512	6	11	10	100	56	68	0.114096	0.218039	0.168342	1.77528	1.09496	1.00613	1.31e-11	1.7639	up	--	--	Molecular Function: DNA binding (GO:0003677);; Cellular Component: nucleus (GO:0005634);;	K09422|5.1e-85|vvi:100253313|K09422 transcription factor MYB, plant | (RefSeq) transcription factor RAX1	--	[K]	Transcription	MYB	Myb-like DNA-binding domain	Transcription factor CSA OS=Oryza sativa subsp. japonica OX=39947 GN=CSA PE=2 SV=2	--	--	Transcription factor like [Actinidia chinensis var. chinensis]
MYB	gene-CEY00_Acc05745	19	18	41	146	75	113	0.524414	0.509233	1.09201	3.79587	2.12014	2.42528	5.48e-08	1.3704	up	--	--	Molecular Function: DNA binding (GO:0003677);; Cellular Component: nucleus (GO:0005634);;	K09422|7.7e-113|vvi:100257755|K09422 transcription factor MYB, plant | (RefSeq) myb-related protein 306	--	[K]	Transcription	MYB	Myb-like DNA-binding domain	Myb-related protein 306 OS=Antirrhinum majus OX=4151 GN=MYB306 PE=2 SV=1	--	--	Myb-related protein [Actinidia chinensis var. chinensis]
MYB	gene-CEY00_Acc22749	41	30	26	119	73	103	0.702151	0.511225	0.41567	1.85617	1.24715	1.32055	4.77e-06	1.10599	up	--	--	Biological Process: reproduction (GO:0000003);; Biological Process: developmental process involved in reproduction (GO:0003006);; Molecular Function: molecular_function (GO:0003674);; Molecular Function: nucleic acid binding (GO:0003676);; Molecular Function: DNA binding (GO:0003677);; Molecular Function: transcription factor activity, sequence-specific DNA binding (GO:0003700);; Molecular Functi…	K01051|2.6e-12|var:108341535|K01051 pectinesterase [EC:3.1.1.11] | (RefSeq) probable pectinesterase/pectinesterase inhibitor 58	Pentose and glucuronate interconversions (ko00040)	[K]	Transcription	MYB	Myb/SANT-like DNA-binding domain	Trihelix transcription factor PTL OS=Arabidopsis thaliana OX=3702 GN=PTL PE=1 SV=1	K	Transcription	Trihelix transcription factor PTL like [Actinidia chinensis var. chinensis]
MYB	gene-CEY00_Acc29258	0	0	0	44	40	43	0	0	0	0.92121	0.907259	0.743961	3.62e-14	2.02958	up	--	--	Molecular Function: DNA binding (GO:0003677);;	K09422|6.9e-98|vvi:100242243|K09422 transcription factor MYB, plant | (RefSeq) transcription factor MYB108	--	[K]	Transcription	MYB	Myb-like DNA-binding domain	Transcription factor MYB62 OS=Arabidopsis thaliana OX=3702 GN=MYB62 PE=2 SV=1	--	--	Transcription factor like [Actinidia chinensis var. chinensis]
MYB	gene-CEY00_Acc23046	98	98	78	241	200	277	1.88893	1.90377	1.39888	4.23562	3.85076	4.03205	9.3e-11	1.1153	up	--	--	Molecular Function: DNA binding (GO:0003677);; Cellular Component: nucleus (GO:0005634);;	K09422|2.6e-80|jre:109000849|K09422 transcription factor MYB, plant | (RefSeq) transcription factor MYB52-like	--	[K]	Transcription	MYB	Myb-like DNA-binding domain	Transcription factor CSA OS=Oryza sativa subsp. japonica OX=39947 GN=CSA PE=2 SV=2	K	Transcription	Transcription factor like [Actinidia chinensis var. chinensis]
MYB	gene-CEY00_Acc31318	11	19	14	80	47	65	0.272285	0.497367	0.335954	1.89805	1.2104	1.28102	1.22e-06	1.28357	up	--	--	Molecular Function: DNA binding (GO:0003677);;	K09422|1.2e-86|qsu:112040952|K09422 transcription factor MYB, plant | (RefSeq) transcription factor MYB62-like	--	[K]	Transcription	MYB	Myb-like DNA-binding domain	Transcription factor MYB62 OS=Arabidopsis thaliana OX=3702 GN=MYB62 PE=2 SV=1	--	--	Transcription factor like [Actinidia chinensis var. chinensis]
MYB	gene-CEY00_Acc30983	324	319	311	728	697	887	7.50854	7.46778	6.72433	15.3525	16.0819	15.5126	3.7e-23	1.0978	up	--	--	Molecular Function: DNA binding (GO:0003677);; Cellular Component: nucleus (GO:0005634);;	K09422|1.7e-105|vvi:100233128|K09422 transcription factor MYB, plant | (RefSeq) SREBP; sucrose responsive element binding protein	--	[K]	Transcription	MYB	Myb-like DNA-binding domain	Transcription factor MYB44 OS=Arabidopsis thaliana OX=3702 GN=MYB44 PE=1 SV=1	K	Transcription	Transcription factor like [Actinidia chinensis var. chinensis]
MYB	gene-CEY00_Acc05753	1170	1143	1149	586	475	647	23.5767	23.323	21.6017	10.7342	9.52535	9.84407	5.54e-29	-1.10416	down	--	--	Molecular Function: DNA binding (GO:0003677);; Cellular Component: nucleus (GO:0005634);;	K09422|4.9e-139|nnu:104598084|K09422 transcription factor MYB, plant | (RefSeq) transcription factor MYB34-like	--	[K]	Transcription	MYB	Myb-like DNA-binding domain	Transcription factor MYB106 OS=Arabidopsis thaliana OX=3702 GN=MYB106 PE=2 SV=1	--	--	Transcription factor like [Actinidia chinensis var. chinensis]
NAC	gene-CEY00_Acc31505	9	4	7	78	39	64	0.226789	0.090314	0.167458	1.85887	1.00948	1.27399	3.31e-10	1.67996	up	--	--	Molecular Function: DNA binding (GO:0003677);; Cellular Component: nucleus (GO:0005634);; Biological Process: regulation of transcription, DNA-templated (GO:0006355);;	K00521|5.1e-42|cmos:111447866|K00521 ferric-chelate reductase [EC:1.16.1.7] | (RefSeq) ferric reduction oxidase 7, chloroplastic-like	--	--	--	NAC	No apical meristem (NAM) protein	NAC domain-containing protein 1 OS=Solanum lycopersicum OX=4081 GN=NAP1 PE=2 SV=1	K	Transcription	NAC transcription factor [Actinidia chinensis var. chinensis]
NAC	gene-CEY00_Acc05460	65	56	59	214	132	224	1.78856	1.5638	1.53313	5.42164	3.65513	4.69606	6.16e-11	1.28629	up	--	--	Molecular Function: DNA binding (GO:0003677);; Cellular Component: nucleus (GO:0005634);; Biological Process: regulation of transcription, DNA-templated (GO:0006355);;	K00521|3.5e-41|cmos:111447866|K00521 ferric-chelate reductase [EC:1.16.1.7] | (RefSeq) ferric reduction oxidase 7, chloroplastic-like	--	--	--	NAC	No apical meristem (NAM) protein	NAC domain-containing protein 2 OS=Arabidopsis thaliana OX=3702 GN=NAC002 PE=1 SV=2	K	Transcription	NAC domain-containing protein [Actinidia chinensis var. chinensis]
NAC	gene-CEY00_Acc24103	125	79	73	365	316	444	2.59587	1.67152	1.42264	6.93921	6.57614	7.00021	9.74e-22	1.65655	up	--	--	Molecular Function: DNA binding (GO:0003677);; Cellular Component: nucleus (GO:0005634);; Biological Process: regulation of transcription, DNA-templated (GO:0006355);;	K00521|5.7e-44|cmos:111447866|K00521 ferric-chelate reductase [EC:1.16.1.7] | (RefSeq) ferric reduction oxidase 7, chloroplastic-like	--	--	--	NAC	No apical meristem (NAM) protein	NAC domain-containing protein 2 OS=Arabidopsis thaliana OX=3702 GN=NAC002 PE=1 SV=2	K	Transcription	NAC domain-containing protein [Actinidia chinensis var. chinensis]
NAC	gene-CEY00_Acc05057	59	73	91	292	301	345	1.55731	1.95059	2.25867	7.0748	7.99923	6.93605	1.85e-24	1.72318	up	--	--	Molecular Function: DNA binding (GO:0003677);; Cellular Component: nucleus (GO:0005634);; Biological Process: regulation of transcription, DNA-templated (GO:0006355);;	K00521|1.6e-43|cmos:111447866|K00521 ferric-chelate reductase [EC:1.16.1.7] | (RefSeq) ferric reduction oxidase 7, chloroplastic-like	--	--	--	NAC	No apical meristem (NAM) protein	NAC domain-containing protein 2 OS=Arabidopsis thaliana OX=3702 GN=NAC002 PE=1 SV=2	K	Transcription	NAC domain-containing protein [Actinidia chinensis var. chinensis]
SRF	gene-CEY00_Acc04856	74	69	88	221	155	189	1.8204	1.702	2.01644	4.96175	3.81218	3.51361	2.61e-07	1.00261	up	--	--	Molecular Function: RNA polymerase II regulatory region sequence-specific DNA binding (GO:0000977);; Molecular Function: transcription factor activity, sequence-specific DNA binding (GO:0003700);; Cellular Component: nucleus (GO:0005634);; Biological Process: positive regulation of transcription from RNA polymerase II promoter (GO:0045944);; Molecular Function: protein dimerization activity (GO:0…	K09264|2.7e-33|smo:SELMODRAFT_450937|K09264 MADS-box transcription factor, plant | (RefSeq) MADS6-2; MADS-domain transcription factor	--	[K]	Transcription	SRF	SRF-type transcription factor (DNA-binding and dimerisation domain)	MADS-box protein AGL24 OS=Arabidopsis thaliana OX=3702 GN=AGL24 PE=1 SV=1	K	Transcription	SVP2 [Actinidia chinensis]
SRF	gene-CEY00_Acc07652	89	97	110	312	200	282	3.24074	3.58555	3.74093	10.4062	7.30059	7.819	2.09e-10	1.13726	up	--	--	Molecular Function: RNA polymerase II regulatory region sequence-specific DNA binding (GO:0000977);; Molecular Function: transcription factor activity, sequence-specific DNA binding (GO:0003700);; Cellular Component: nucleus (GO:0005634);; Biological Process: positive regulation of transcription from RNA polymerase II promoter (GO:0045944);; Molecular Function: protein dimerization activity (GO:0…	K09264|2.7e-35|aof:109822847|K09264 MADS-box transcription factor, plant | (RefSeq) MADS-box transcription factor 3-like isoform X1	--	[K]	Transcription	SRF	SRF-type transcription factor (DNA-binding and dimerisation domain)	MADS-box protein SOC1 OS=Arabidopsis thaliana OX=3702 GN=SOC1 PE=1 SV=1	K	Transcription	SOC1f [Actinidia chinensis]
TCP	gene-CEY00_Acc13889	35	38	41	101	87	122	1.04597	1.15668	1.15897	2.814	2.63794	2.80622	2.41e-06	1.04989	up	--	--	Molecular Function: transcription factor activity, sequence-specific DNA binding (GO:0003700);;	--	--	--	--	TCP	TCP family transcription factor	Transcription factor TCP4 OS=Arabidopsis thaliana OX=3702 GN=TCP4 PE=1 SV=1	K	Transcription	Transcription factor like [Actinidia chinensis var. chinensis]
WRKY	gene-CEY00_Acc22141	41	65	32	174	161	110	0.906954	1.47242	0.666535	3.56603	3.60645	1.87397	2.26e-06	1.16507	up	--	--	Molecular Function: transcription factor activity, sequence-specific DNA binding (GO:0003700);; Cellular Component: nucleus (GO:0005634);; Molecular Function: sequence-specific DNA binding (GO:0043565);;	K18834|8.5e-17|jre:108994063|K18834 WRKY transcription factor 1 | (RefSeq) WRKY transcription factor 1	Plant-pathogen interaction (ko04626)	--	--	WRKY	WRKY DNA -binding domain	Probable WRKY transcription factor 40 OS=Arabidopsis thaliana OX=3702 GN=WRKY40 PE=1 SV=1	K	Transcription	WRKY transcription factor [Actinidia chinensis var. chinensis]
WRKY	gene-CEY00_Acc22439	25	32	22	120	83	148	0.653427	0.854894	0.537111	2.8623	2.18285	2.9351	2.35e-11	1.52688	up	--	--	Molecular Function: transcription factor activity, sequence-specific DNA binding (GO:0003700);; Cellular Component: nucleus (GO:0005634);; Molecular Function: sequence-specific DNA binding (GO:0043565);;	K13424|4.4e-20|csat:104768914|K13424 WRKY transcription factor 33 | (RefSeq) probable WRKY transcription factor 26 isoform X1	MAPK signaling pathway - plant (ko04016);; Plant-pathogen interaction (ko04626)	--	--	WRKY	WRKY DNA -binding domain	Probable WRKY transcription factor 40 OS=Arabidopsis thaliana OX=3702 GN=WRKY40 PE=1 SV=1	K	Transcription	WRKY transcription factor 40 [Actinidia chinensis var. chinensis]
WRKY	gene-CEY00_Acc12414	7	2	14	89	67	80	0.212234	0.060742	0.391051	2.44098	2.0054	1.8188	1.49e-13	1.91716	up	--	--	Molecular Function: transcription factor activity, sequence-specific DNA binding (GO:0003700);; Cellular Component: nucleus (GO:0005634);; Molecular Function: sequence-specific DNA binding (GO:0043565);;	K18834|1.5e-16|mtr:MTR_5g097490|K18834 WRKY transcription factor 1 | (RefSeq) WRKY family transcription factor	Plant-pathogen interaction (ko04626)	--	--	WRKY	WRKY DNA -binding domain	WRKY transcription factor WRKY71 OS=Oryza sativa subsp. indica OX=39946 GN=WRKY71 PE=1 SV=1	K	Transcription	WRKY transcription factor [Actinidia chinensis var. chinensis]
WRKY	gene-CEY00_Acc22438	1061	933	1127	2968	2076	2397	30.2571	26.9179	29.9935	77.0085	58.964	51.5859	2.58e-16	1.06874	up	--	--	Molecular Function: transcription factor activity, sequence-specific DNA binding (GO:0003700);; Cellular Component: nucleus (GO:0005634);; Molecular Function: sequence-specific DNA binding (GO:0043565);;	K13424|5.2e-18|ccaj:109816325|K13424 WRKY transcription factor 33 | (RefSeq) probable WRKY transcription factor 33	MAPK signaling pathway - plant (ko04016);; Plant-pathogen interaction (ko04626)	--	--	WRKY	WRKY DNA -binding domain	Probable WRKY transcription factor 40 OS=Arabidopsis thaliana OX=3702 GN=WRKY40 PE=1 SV=1	K	Transcription	WRKY transcription factor 40 [Actinidia chinensis var. chinensis]
WRKY	gene-CEY00_Acc31852	72	83	76	349	194	248	1.10832	1.29697	1.09552	4.95183	3.01456	2.91642	5.04e-12	1.38184	up	--	--	Molecular Function: transcription factor activity, sequence-specific DNA binding (GO:0003700);; Cellular Component: nucleus (GO:0005634);; Molecular Function: sequence-specific DNA binding (GO:0043565);;	K13424|5.5e-200|vvi:100243352|K13424 WRKY transcription factor 33 | (RefSeq) WRKY transcription factor WRKY24	MAPK signaling pathway - plant (ko04016);; Plant-pathogen interaction (ko04626)	--	--	WRKY	WRKY DNA -binding domain	WRKY transcription factor WRKY24 OS=Oryza sativa subsp. indica OX=39946 GN=WRKY24 PE=2 SV=1	K	Transcription	WRKY transcription factor [Actinidia chinensis var. chinensis]
WRKY	gene-CEY00_Acc14979	69	113	87	259	193	266	1.07816	1.77851	1.26647	3.68431	2.99871	3.1382	4.79e-09	1.10736	up	--	--	Molecular Function: transcription factor activity, sequence-specific DNA binding (GO:0003700);; Cellular Component: nucleus (GO:0005634);; Molecular Function: sequence-specific DNA binding (GO:0043565);;	K13424|1.8e-22|nnu:104602496|K13424 WRKY transcription factor 33 | (RefSeq) WRKY transcription factor WRKY24-like	MAPK signaling pathway - plant (ko04016);; Plant-pathogen interaction (ko04626)	--	--	WRKY	WRKY DNA -binding domain	WRKY transcription factor 6 OS=Arabidopsis thaliana OX=3702 GN=WRKY6 PE=1 SV=1	K	Transcription	WRKY transcription factor [Actinidia chinensis var. chinensis]
WRKY	gene-CEY00_Acc19793	215	207	250	575	439	541	3.60204	3.51638	3.91912	8.79497	7.34283	6.85579	4.45e-13	1.01223	up	--	--	Molecular Function: transcription factor activity, sequence-specific DNA binding (GO:0003700);; Cellular Component: nucleus (GO:0005634);; Molecular Function: sequence-specific DNA binding (GO:0043565);;	K16225|2.4e-17|csat:104760397|K16225 probable WRKY transcription factor 52 | (RefSeq) disease resistance protein RRS1-like	Plant-pathogen interaction (ko04626)	--	--	WRKY	WRKY DNA -binding domain	Probable WRKY transcription factor 53 OS=Arabidopsis thaliana OX=3702 GN=WRKY53 PE=1 SV=1	K	Transcription	WRKY transcription factor 53 [Actinidia chinensis var. chinensis]
WRKY	gene-CEY00_Acc01838	37	42	32	178	133	121	0.606448	0.693345	0.480321	2.67447	2.19806	1.50759	2.11e-10	1.43427	up	--	--	Molecular Function: transcription factor activity, sequence-specific DNA binding (GO:0003700);; Cellular Component: nucleus (GO:0005634);; Molecular Function: sequence-specific DNA binding (GO:0043565);;	K13424|1.3e-134|hbr:110633735|K13424 WRKY transcription factor 33 | (RefSeq) probable WRKY transcription factor 33	MAPK signaling pathway - plant (ko04016);; Plant-pathogen interaction (ko04626)	--	--	WRKY	WRKY DNA -binding domain	WRKY transcription factor WRKY24 OS=Oryza sativa subsp. japonica OX=39947 GN=WRKY24 PE=2 SV=1	K	Transcription	WRKY transcription factor 33 [Actinidia chinensis var. chinensis]
[truncated: 14 more rows]

## Sheet: Table S5
Table S5 The 44 hormone-related differentially expressed genes of the transcriptome.
[truncated: 45 more rows]

[truncated: 2 more sheets: Table S6, Table S7]
